# Supplementary material for: Metal- and additive-free β-C(sp2)–H decarboxylative alkylsulfonylation of enamides from phenyliodine(iii) dicarboxylates and sulfur dioxide
Source: Royal Society of Chemistry journal article supplement (doi:10.1039/d4cc02865a), 2024-01-01

# Metal- and additive-free $\beta$ -C(sp<sup>2</sup>)-H decarboxylative alkylsulfonylation of enamides from phenyliodine(III) dicarboxylates and sulfur dioxide

Wenyan Li,<sup>a</sup> Cenxin Wang,<sup>a</sup> Tonghao Zhu,<sup>\*b</sup> Gang Liu<sup>\*a</sup> and Jie Wu<sup>\*b,c,d</sup>

<sup>a</sup> Jiangxi Key Laboratory of Organic Chemistry, Jiangxi Science and Technology Normal University, Nanchang  
330013, China.

<sup>b</sup> School of Pharmaceutical and Chemical Engineering & Institute for Advanced Studies, Taizhou University, 1139  
Shifu Avenue, Taizhou 318000, China.

<sup>c</sup> State Key Laboratory of Organometallic Chemistry, Shanghai Institute of Organic Chemistry, Chinese Academy  
of Sciences, Shanghai, 200032, China.

<sup>d</sup> School of Chemistry and Chemical Engineering, Henan Normal University, Xinxiang, 453007, China.

E-mail: zhuth@tzc.edu.cn; liugang0926@163.com; jie\_wu@fudan.edu.cn

|                                                                                |         |
|--------------------------------------------------------------------------------|---------|
| 1. General Information                                                         | S1      |
| 2. General procedures for the synthesis of alkylsulfonylated products          | S2-S3   |
| 3. 1mmol-scale synthesis of <b>3aa</b>                                         | S3      |
| 4. Optimization of reaction conditions                                         | S4      |
| 5. Characterization data for products                                          | S5-S23  |
| 6. <sup>1</sup> H, <sup>19</sup> F and <sup>13</sup> C NMR spectra of products | S24-S72 |

### ***General Information***

All reactions were carried out in oven dried Schlenk tubes under nitrogen atmosphere. Unless otherwise stated, all commercial reagents were used as received. All solvents were dried and distilled according to standard procedures.  $^1\text{H}$ ,  $^{19}\text{F}$ ,  $^{13}\text{C}$  NMR spectra were recorded in  $\text{CDCl}_3$  on Bruker Avance 400 MHz spectrometers. High resolution mass spectra (HRMS) were obtained using a commercial apparatus (ESI Source). Electrospray-ionisation HRMS data were acquired on a Q-ToF mass spectrometer (Waters SYNAPT G2-Si) LC-MS TOF. NMR spectra were taken using  $\text{CDCl}_3$  ( $^1\text{H}$ ,  $\delta = 7.26$ ) and  $\text{CDCl}_3$  ( $^{13}\text{C}$ , CPD  $\delta = 77.0$ ) as the internal standards, respectively. Column chromatography was generally performed on silica gel (300-400 mesh) and reactions were monitored by thin layer chromatography (TLC) using UV light to visualize the course of the reactions.

*General procedures for the synthesis of alkylsulfonylated enamides and alkylsulfonylated pyrrolidones*

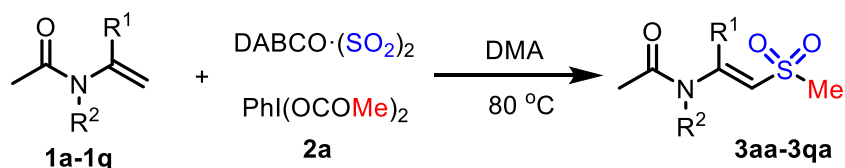

Enamides **1a-1q** (0.3 mmol), phenyliodine(III) dicarboxylate **2a** (0.75 mmol, 2.5 equiv) and DABCO ( $\text{SO}_2$ )<sub>2</sub> (0.45 mmol, 1.5 equiv) were added sequentially into Schlenk tube under nitrogen. DMA (1.5 mL) was added rapidly by syringe. The resulting mixture was allowed to stir in the oil bath at  $80\text{ }^\circ\text{C}$  for 1 hour. Then, the reaction mixture was poured into saturated sodium bicarbonate solution and the aqueous layer was extracted with DCM (10 mL x 3). The combined organic layer was dried over sodium sulfate, and concentrated under reduced pressure. The residue was purified by flash column chromatography to provide the target product **3aa-3qa**.

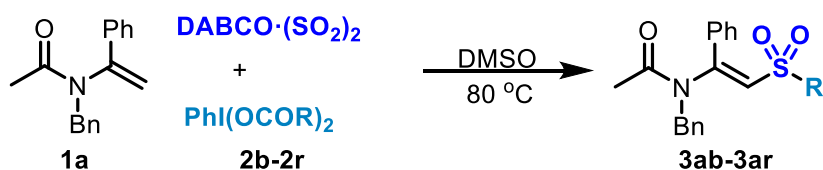

*N*-Acetyl-*N*-(1-phenylvinyl)methacrylamide **1a** (0.3 mmol), phenyliodine(III) dicarboxylates **2b-2r** (0.75 mmol, 2.5 equiv) and DABCO ( $\text{SO}_2$ )<sub>2</sub> (0.45 mmol, 1.5 equiv) were added sequentially into Schlenk tube under nitrogen. DMA (1.5 mL) was added rapidly by syringe. The resulting mixture was allowed to stir in the oil bath at  $80\text{ }^\circ\text{C}$  for 1 hour. Then, the reaction mixture was poured into saturated sodium bicarbonate solution and the aqueous layer was extracted with DCM (10 mL x 3). The combined organic layer was dried over sodium sulfate, and concentrated under reduced pressure. The residue was purified by flash column chromatography to provide the target product **3ab-3ar**.

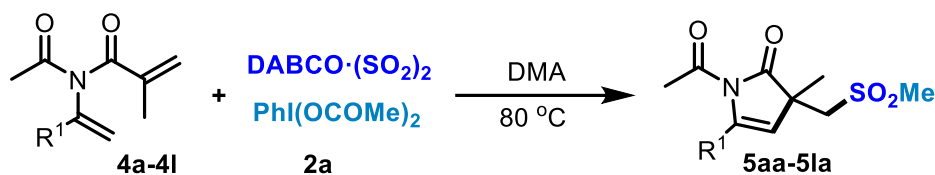

*N*-Methacryloyl enamides **4a-4l** (0.3 mmol), phenyliodine(III) dicarboxylate **2a** (0.75 mmol, 2.5 equiv) and DABCO (SO<sub>2</sub>)<sub>2</sub> (0.45 mmol, 1.5 equiv) were added sequentially into Schlenk tube under nitrogen. DMA (1.5 mL) was added rapidly by syringe. The resulting mixture was allowed to stir in the oil bath at 80 °C for 1 hour. Then the reaction mixture was poured into saturated sodium bicarbonate solution and the aqueous layer was extracted with DCM (10 mL x 3). The combined organic layer was dried over sodium sulfate, and concentrated under reduced pressure. The residue was purified by flash column chromatography to obtain the target product **5aa-5la**.

#### *Immol-scale synthesis of 3aa*

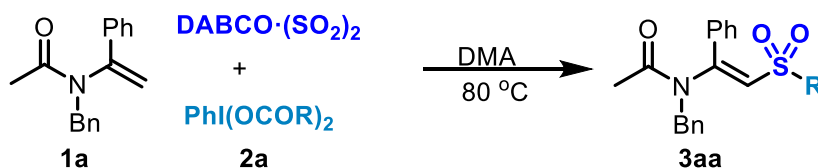

*N*-Acetyl-*N*-(1-phenylvinyl)methacrylamide **1a** (1.0 mmol), phenyliodine(III) dicarboxylate **2a** (2.5 mmol, 2.5 equiv) and DABCO (SO<sub>2</sub>)<sub>2</sub> (1.5 mmol, 1.5 equiv) were added sequentially into Schlenk tube under nitrogen. DMA (5.0 mL) was added rapidly by syringe. The resulting mixture was allowed to stir in the oil bath at 80 °C for 1 hour. Then, the reaction mixture was poured into saturated sodium bicarbonate solution and the aqueous layer was extracted with DCM (50 mL x 3). The combined organic layer was dried over sodium sulfate, and concentrated under reduced pressure. The residue was purified by column chromatography (PE/EA = 2-1) to obtain the target product **3aa** in 75% yield.

*Optimization of reaction conditions*

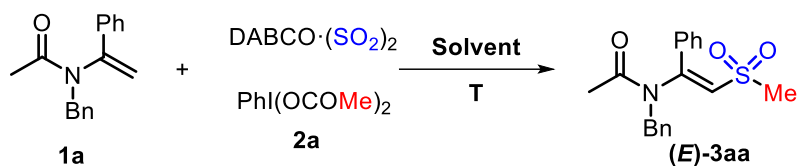

| Entry     | DABSO (equiv) | PhI(OCOMe) <sub>2</sub> (equiv) | Solvent     | T (° C)   | Yield (%) |
|-----------|---------------|---------------------------------|-------------|-----------|-----------|
| 1         | 1.5           | 1.5                             | MeCN        | 80        | 52        |
| 2         | 1.5           | 1.5                             | DMF         | 80        | 47        |
| 3         | 1.5           | 1.5                             | DMA         | 80        | 62        |
| 4         | 1.5           | 1.5                             | NMP         | 80        | 49        |
| 5         | 1.5           | 1.5                             | DMSO        | 80        | 47        |
| 6         | 1.5           | 1.5                             | EA          | 80        | trace     |
| 7         | 1.5           | 1.5                             | DCE         | 80        | trace     |
| 8         | 1.5           | 1.5                             | Toluene     | 80        | trace     |
| 9         | 1.5           | 1.5                             | 1,4-dioxane | 80        | trace     |
| 10        | 1.2           | 1.5                             | DMA         | 80        | 41        |
| 11        | 2.0           | 1.5                             | DMA         | 80        | 42        |
| 12        | 1.5           | 1.2                             | DMA         | 80        | 31        |
| 13        | 1.5           | 2.0                             | DMA         | 80        | 75        |
| <b>14</b> | <b>1.5</b>    | <b>2.5</b>                      | <b>DMA</b>  | <b>80</b> | <b>81</b> |
| 15        | 1.5           | 3.0                             | DMA         | 80        | 76        |
| 16        | 1.5           | 2.5                             | DMA         | 60        | 28        |
| 17        | 1.5           | 2.5                             | DMA         | 100       | 65        |

### Characterization data for products

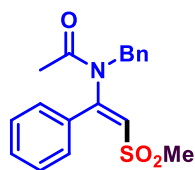

(*E*)-*N*-benzyl-*N*-(2-(methylsulfonyl)-1-phenylvinyl)acetamide (**3aa**): 78.1 mg, 79% yield, white solid. Purification by flash chromatography (PE/EA = 2-1).  $^1\text{H NMR}$  (400 MHz,  $\text{CDCl}_3$ )  $\delta$  ppm 7.57-7.43 (m, 5H), 7.36 – 7.23 (m, 3H), 7.20- 7.12 (m, 2H), 6.21 (s, 1H), 4.62 (s, 2H), 2.67 (s, 3H), 2.20 (s, 3H);  $^{13}\text{C NMR}$  (100 MHz,  $\text{CDCl}_3$ )  $\delta$  ppm 170.2, 151.9, 136.2, 132.1, 131.7, 129.8, 128.74, 128.70, 128.4, 127.9, 127.5, 50.5, 43.2, 23.2; **HRMS (ESI)**  $m/z$ :  $[\text{M}+\text{Na}]^+$  calcd for  $\text{C}_{18}\text{H}_{19}\text{NNaO}_3\text{S}^+$  352.0983, found 352.0988.

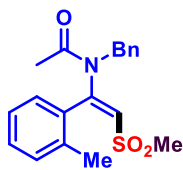

(*E*)-*N*-benzyl-*N*-(2-(methylsulfonyl)-1-(*o*-tolyl)vinyl)acetamide (**3ba**): 34.0 mg, 33% yield, white solid. Purification by flash chromatography (PE/EA = 2-1).  $^1\text{H NMR}$  (400 MHz,  $\text{CDCl}_3$ )  $\delta$  ppm 7.39 (td,  $J = 7.5, 1.6$  Hz, 1H), 7.35 – 7.17 (m, 6H), 7.09 – 7.02 (m, 2H), 6.49 (s, 1H), 4.55 (s, 2H), 2.70 (s, 3H), 2.34 (s, 3H), 2.25 (s, 3H);  $^{13}\text{C NMR}$  (100 MHz,  $\text{CDCl}_3$ )  $\delta$  ppm 170.8, 152.2, 137.0, 136.4, 131.3, 131.2, 130.9, 130.8, 128.7, 127.6, 127.0, 125.7, 125.3, 50.1, 43.8, 23.7, 19.7; **HRMS (ESI)**  $m/z$ :  $[\text{M}+\text{Na}]^+$  calcd for  $\text{C}_{19}\text{H}_{21}\text{NNaO}_3\text{S}^+$  366.1140, found 366.1149.

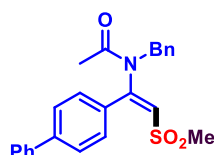

(*E*)-*N*-(1-([1,1'-biphenyl]-4-yl)-2-(methylsulfonyl)vinyl)-*N*-benzylacetamide (**3ca**): 98.6 mg, 81% yield, white solid. Purification by flash chromatography (PE/EA = 2-1).  $^1\text{H NMR}$  (400 MHz,  $\text{CDCl}_3$ )  $\delta$  ppm 7.69 (d,  $J = 8.3$  Hz, 2H), 7.65-7.60 (m, 2H), 7.57

(d,  $J = 8.2$  Hz, 2H), 7.47 (t,  $J = 7.4$  Hz, 2H), 7.43 – 7.37 (m, 1H), 7.36 – 7.24 (m, 3H), 7.23 – 7.16 (m, 2H), 6.21 (s, 1H), 4.67 (s, 2H), 2.72 (s, 3H), 2.22 (s, 3H);  $^{13}\text{C}$  NMR (100 MHz,  $\text{CDCl}_3$ )  $\delta$  ppm 170.3, 151.7, 144.5, 139.5, 136.4, 130.9, 130.5, 129.0, 128.8, 128.6, 128.3, 128.0, 127.5, 127.4, 127.2, 50.7, 43.4, 23.3; HRMS (ESI)  $m/z$ :  $[\text{M}+\text{Na}]^+$  calcd for  $\text{C}_{24}\text{H}_{23}\text{NNaO}_3\text{S}^+$  428.1296, found 428.1298.

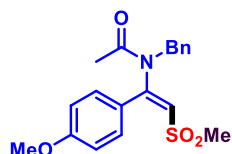

(*E*)-*N*-benzyl-*N*-(1-(4-methoxyphenyl)-2-(methylsulfonyl)vinyl)acetamide (**3da**): 87.4 mg, 81% yield, (*E/Z* = 77:23), white solid. Purification by flash chromatography (PE/EA = 1).  $^1\text{H}$  NMR (400 MHz,  $\text{CDCl}_3$ )  $\delta$  ppm 7.50 – 7.42 (m, 1.54H for *E*-isomer), 7.36 – 7.15 (m, 5H+0.46H for *Z*-isomer), 7.02 – 6.92 (m, 2H), 6.45 (s, 0.23H for *Z*-isomer), 6.10 (s, 0.77H for *E*-isomer), 5.40 (d,  $J = 14.2$  Hz, 0.23H for *Z*-isomer), 4.64 (s, 1.54H for *E*-isomer), 4.07 (d,  $J = 14.2$  Hz, 0.23H for *Z*-isomer), 3.91 – 3.83 (m, 3H), 2.69 (s, 2.31H for *E*-isomer), 2.32 (s, 0.69H for *Z*-isomer), 2.22 (s, 0.69H for *Z*-isomer), 2.16 (s, 2.31H for *E*-isomer);  $^{13}\text{C}$  NMR (100 MHz,  $\text{CDCl}_3$ ) for mixture  $\delta$  ppm 170.4, 162.5, 162.4, 151.8, 150.7, 136.4, 136.3, 131.7, 130.6, 129.2, 128.7, 128.6, 128.3, 128.0, 127.9, 126.1, 125.9, 124.1, 122.0, 114.9, 114.3, 55.6, 55.5, 50.7, 50.5, 43.3, 43.2, 23.3, 23.2; HRMS (ESI)  $m/z$ :  $[\text{M}+\text{Na}]^+$  calcd for  $\text{C}_{19}\text{H}_{21}\text{NNaO}_4\text{S}^+$  382.1089, found 382.1097.

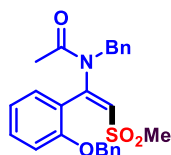

(*E*)-*N*-benzyl-*N*-(1-(2-(benzyloxy)phenyl)-2-(methylsulfonyl)vinyl)acetamide (**3ea**): yield: 86.7 mg, 66% yield, (*E/Z* = 88:12), white solid. Purification by flash chromatography (PE/EA = 2-1).  $^1\text{H}$  NMR (400 MHz,  $\text{CDCl}_3$ )  $\delta$  ppm 7.51 – 7.14 (m, 12H), 7.07 – 6.99 (m, 2H), 6.44 (s, 0.12H for *Z*-isomer), 6.09 (s, 0.88H for *E*-isomer), 5.40 (d,  $J = 14.1$  Hz, 0.12H for *Z*-isomer), 5.10 (s, 2H), 4.64 (s, 1.76H for *E*-isomer),

4.06 (d,  $J = 14.2$  Hz, 0.12H for *Z*-isomer), 2.68 (s, 2.64H for *E*-isomer), 2.31 (s, 0.36H for *Z*-isomer), 2.22 (s, 0.36H for *Z*-isomer), 2.16 (s, 2.64H for *E*-isomer);  $^{13}\text{C}$  NMR (100 MHz,  $\text{CDCl}_3$ ) for mixture  $\delta$  ppm 170.33, 170.29, 161.64, 161.56, 151.6, 150.7, 136.3, 136.2, 136.0, 135.9, 131.7, 130.6, 129.2, 128.71, 128.69, 128.5, 128.3, 128.2, 127.93, 127.88, 127.6, 127.5, 126.2, 124.3, 122.1, 115.7, 115.0, 70.3, 70.2, 50.7, 50.4, 43.23, 43.16, 23.22, 22.17; HRMS (ESI)  $m/z$ :  $[\text{M}+\text{Na}]^+$  calcd for  $\text{C}_{25}\text{H}_{25}\text{NNaO}_4\text{S}^+$  458.1402, found 458.1405.

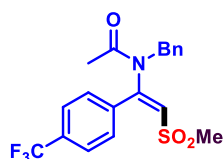

(*E*)-*N*-benzyl-*N*-(2-(methylsulfonyl)-1-(4-(trifluoromethyl)phenyl)vinyl)acetamide (**3fa**): 81.1 mg, 68% yield, white solid. Purification by flash chromatography (PE/EA = 2-1).  $^1\text{H}$  NMR (400 MHz,  $\text{CDCl}_3$ )  $\delta$  ppm 7.70 (d,  $J = 8.1$  Hz, 2H), 7.57 (d,  $J = 8.0$  Hz, 2H), 7.37 – 7.27 (m, 3H), 7.18 – 7.11 (m, 2H), 6.31 (s, 1H), 4.61 (s, 2H), 2.77 (s, 3H), 2.24 (s, 3H);  $^{13}\text{C}$  NMR (100 MHz,  $\text{CDCl}_3$ )  $\delta$  ppm 170.1, 150.5, 135.9, 135.7, 133.1 (q,  $J = 33.0$  Hz), 130.2, 128.9, 128.22, 128.18, 128.1, 125.5 (q,  $J = 3.7$  Hz), 123.43 (q,  $J = 271.3$  Hz), 50.7, 43.6, 23.2;  $^{19}\text{F}$  NMR (376 MHz,  $\text{CDCl}_3$ )  $\delta$  -62.99 (s); HRMS (ESI)  $m/z$ :  $[\text{M}+\text{Na}]^+$  calcd for  $\text{C}_{19}\text{H}_{18}\text{NNaO}_3\text{S}^+$  420.0857, found 420.0858.

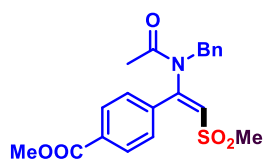

methyl (*E*)-4-(1-(*N*-benzylacetamido)-2-(methylsulfonyl)vinyl)benzoate (**3ga**): 78.2 mg, 67% yield, white solid. Purification by flash chromatography (PE/EA = 1).  $^1\text{H}$  NMR (400 MHz,  $\text{CDCl}_3$ )  $\delta$  ppm 8.11 (d,  $J = 8.3$  Hz, 2H), 7.53 (d,  $J = 8.3$  Hz, 2H), 7.36 – 7.27 (m, 3H), 7.18 – 7.10 (m, 2H), 6.29 (s, 1H), 4.61 (s, 2H), 3.95 (s, 3H), 2.74 (s, 3H), 2.23 (s, 3H);  $^{13}\text{C}$  NMR (100 MHz,  $\text{CDCl}_3$ )  $\delta$  ppm 170.2, 166.0, 151.0, 136.5, 136.0, 132.8, 129.9, 129.8, 128.9, 128.3, 128.14, 128.11, 52.5, 50.7, 43.6, 23.3; HRMS (ESI)  $m/z$ :  $[\text{M}+\text{Na}]^+$  calcd for  $\text{C}_{20}\text{H}_{21}\text{NNaO}_5\text{S}^+$  410.1038, found 410.1043.



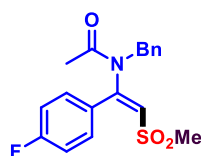

(*E*)-*N*-benzyl-*N*-(1-(4-fluorophenyl)-2-(methylsulfonyl)vinyl)acetamide (**3ha**): 67.8 mg, 65% yield, white solid. Purification by flash chromatography (PE/EA = 2-1).  $^1\text{H}$  NMR (400 MHz,  $\text{CDCl}_3$ )  $\delta$  ppm 7.52 – 7.42 (m, 2.0 Hz, 2H), 7.38 – 7.24 (m, 3H), 7.19 – 7.10 (m, 4H), 6.21 (d,  $J = 1.8$  Hz, 1H), 4.61 (s, 2H), 2.72 (s, 3H), 2.19 (s, 3H);  $^{13}\text{C}$  NMR (100 MHz,  $\text{CDCl}_3$ )  $\delta$  ppm 170.0, 164.4 (d,  $J = 252.0$  Hz), 150.8, 136.1, 132.0 (d,  $J = 8.0$  Hz), 128.7, 128.2, 128.0 (d,  $J = 4.0$  Hz), 128.8, 127.1, 115.9 (d,  $J = 22.0$  Hz), 50.4, 43.2, 23.1;  $^{19}\text{F}$  NMR (376 MHz,  $\text{CDCl}_3$ )  $\delta$  -106.55 - -106.95 (m); HRMS (ESI)  $m/z$ :  $[\text{M}+\text{Na}]^+$  calcd for  $\text{C}_{18}\text{H}_{18}\text{NNaO}_3\text{SF}^+$  370.0889, found 370.0891.

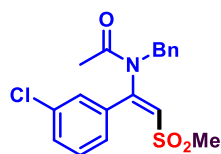

(*E*)-*N*-benzyl-*N*-(1-(3-chlorophenyl)-2-(methylsulfonyl)vinyl)acetamide (**3ia**): 51.5 mg, 47% yield, white solid. Purification by flash chromatography (PE/EA = 2-1).  $^1\text{H}$  NMR (400 MHz,  $\text{CDCl}_3$ )  $\delta$  ppm 7.52 -7.46 (m, 1H), 7.43 – 7.25 (m, 6H), 7.21 – 7.11 (m, 2H), 6.26 (s, 1H), 4.60 (s, 2H), 2.74 (s, 3H), 2.22 (s, 3H);  $^{13}\text{C}$  NMR (100 MHz,  $\text{CDCl}_3$ )  $\delta$  ppm 170.0, 150.3, 136.0, 134.6, 133.8, 131.5, 129.8, 129.1, 128.7, 128.4, 128.2, 127.93, 127.87, 50.5, 43.4, 23.1; HRMS (ESI)  $m/z$ :  $[\text{M}+\text{Na}]^+$  calcd for  $\text{C}_{18}\text{H}_{18}^{35}\text{ClNNaO}_3\text{S}^+$  386.0594, found 386.0596,  $[\text{M}+\text{Na}]^+$  calcd for  $\text{C}_{18}\text{H}_{18}^{37}\text{ClNNaO}_3\text{S}^+$  388.0559, found 388.0567.

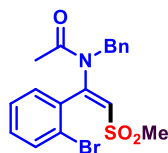

(*E*)-*N*-benzyl-*N*-(1-(2-bromophenyl)-2-(methylsulfonyl)vinyl)acetamide (**3ja**): 43.0 mg, 35% yield, light yellow solid. Purification by flash chromatography (PE/EA = 2-1).  $^1\text{H}$  NMR (400 MHz,  $\text{CDCl}_3$ )  $\delta$  ppm 7.63 (dd,  $J = 5.6, 3.6$  Hz, 1H), 7.37 – 7.25

(m, 6H), 7.05 (d,  $J = 6.8$  Hz, 2H), 6.50 (s, 1H), 4.87 – 4.21 (m, 2H), 2.80 (s, 3H), 2.40 (s, 3H);  $^{13}\text{C}$  NMR (100 MHz,  $\text{CDCl}_3$ )  $\delta$  ppm 170.9, 151.4, 136.3, 134.4, 133.2, 132.2, 132.1, 128.7, 127.6, 127.0, 126.9, 125.3, 121.8, 50.5, 43.8, 23.7. **HRMS (ESI)**  $m/z$ :  $[\text{M}+\text{Na}]^+$  calcd for  $\text{C}_{18}\text{H}_{18}^{79}\text{BrNNaO}_3\text{S}^+$  430.0088, found 430.0091,  $[\text{M}+\text{Na}]^+$  calcd for  $\text{C}_{18}\text{H}_{18}^{81}\text{BrNNaO}_3\text{S}^+$  432.0068, found 432.0074.

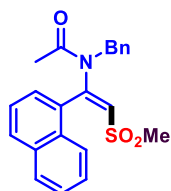

(*E*)-*N*-benzyl-*N*-(2-(methylsulfonyl)-1-(naphthalen-2-yl)vinyl)acetamide (**3ka**): 53.7 mg, 47% yield, white solid. Purification by flash chromatography (PE/EA = 2-1).  $^1\text{H}$  NMR (400 MHz,  $\text{CDCl}_3$ )  $\delta$  ppm 7.88 (dd,  $J = 7.5, 1.9$  Hz, 1H), 7.85 – 7.79 (m, 1H), 7.70 – 7.63 (m, 1H), 7.49 – 7.41 (m, 2H), 7.41 – 7.32 (m, 2H), 7.25 – 7.13 (m, 3H), 6.97 – 6.90 (m, 2H), 6.74 (s, 1H), 4.35 (br, 2H), 2.50 (s, 3H), 2.31 (s, 3H);  $^{13}\text{C}$  NMR (100 MHz,  $\text{CDCl}_3$ )  $\delta$  ppm 170.9, 150.4, 136.4, 133.2, 131.4, 130.8, 130.6, 128.9, 128.7, 128.4, 127.6, 127.5, 127.3, 126.7, 126.6, 124.7, 123.7, 50.3, 43.6, 23.8.; **HRMS (ESI)**  $m/z$ :  $[\text{M}+\text{Na}]^+$  calcd for  $\text{C}_{22}\text{H}_{21}\text{NNaO}_3\text{S}^+$  402.1140, found 402.1145.

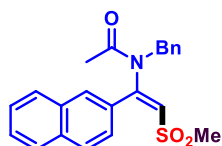

(*E*)-*N*-benzyl-*N*-(2-(methylsulfonyl)-1-(naphthalen-2-yl)vinyl)acetamide (**3la**): 89.9 mg, 79% yield, white solid. Purification by flash chromatography (PE/EA = 2-1).  $^1\text{H}$  NMR (400 MHz,  $\text{CDCl}_3$ )  $\delta$  ppm 8.03 (d,  $J = 1.8$  Hz, 1H), 7.95 – 7.85 (m, 3H), 7.64 – 7.54 (m, 2H), 7.51 (dd,  $J = 8.5, 1.8$  Hz, 1H), 7.37 – 7.25 (m, 3H), 7.22 – 7.14 (m, 2H), 6.30 (s, 1H), 4.66 (s, 2H), 2.67 (s, 3H), 2.24 (s, 3H);  $^{13}\text{C}$  NMR (100 MHz,  $\text{CDCl}_3$ )  $\delta$  ppm 170.3, 151.9, 136.3, 134.4, 132.4, 131.0, 129.3, 128.9, 128.71, 128.68, 128.4, 128.2, 127.9, 127.78, 127.77, 127.1, 125.5, 50.7, 43.2, 23.3. **HRMS (ESI)**  $m/z$ :  $[\text{M}+\text{Na}]^+$  calcd for  $\text{C}_{22}\text{H}_{21}\text{NNaO}_3\text{S}^+$  402.1140, found 402.1145.

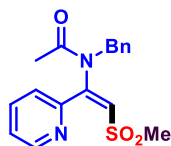

(*E*)-*N*-benzyl-*N*-(2-(methylsulfonyl)-1-(pyridin-2-yl)vinyl)acetamide (**3ma**): 50.4 mg, 51% yield (*E/Z* = 91:9), light yellow oil. Purification by flash chromatography (PE/EA = 1).  $^1\text{H NMR}$  (400 MHz,  $\text{CDCl}_3$ )  $\delta$  ppm 9.11 (d,  $J = 2.0$  Hz, 0.09H for *Z*-isomer), 8.70 (ddd,  $J = 4.8, 1.5, 0.9$  Hz, 0.91H), 8.18 (dd,  $J = 8.3, 2.3$  Hz, 0.09H for *Z*-isomer), 7.76 (td,  $J = 7.8, 1.7$  Hz, 0.91H), 7.46 – 7.09 (m, 7H), 6.50 (s, 0.09H for *Z*-isomer), 6.24 (s, 0.91H), 5.30 (s, 0.09H for *Z*-isomer), 4.71 (s, 1.82H), 3.17 (s, 2.73H), 3.12 (s, 0.27H for *Z*-isomer), 2.16 (s, 2.73H), 2.01 (s, 0.27H for *Z*-isomer);  $^{13}\text{C NMR}$  (100 MHz,  $\text{CDCl}_3$ ) for mixture  $\delta$  ppm 170.4, 170.3, 157.6, 152.2, 151.3, 149.3, 148.6, 136.9, 136.6, 136.5, 136.0, 129.0, 128.7, 128.6, 128.34, 128.30, 127.8, 127.5, 125.1, 124.5, 122.1, 119.4, 51.1, 50.5, 45.2, 44.7, 23.0, 21.9; **HRMS (ESI)**  $m/z$ :  $[\text{M}+\text{Na}]^+$  calcd for  $\text{C}_{17}\text{H}_{18}\text{N}_2\text{NaO}_3\text{S}^+$  353.0936, found 353.0940.

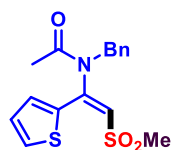

(*E*)-*N*-benzyl-*N*-(2-(methylsulfonyl)-1-(thiophen-2-yl)vinyl)acetamide (**3na**): 69.4 mg, 69% yield, light yellow solid. Purification by flash chromatography (PE/EA = 2-1).  $^1\text{H NMR}$  (400 MHz,  $\text{CDCl}_3$ )  $\delta$  ppm 7.87 (dd,  $J = 3.0, 1.4$  Hz, 1H), 7.42 (dd,  $J = 5.1, 3.0$  Hz, 1H), 7.37 – 7.17 (m, 6H), 6.13 (s, 1H), 4.71 (s, 2H), 2.69 (s, 3H), 2.10 (s, 3H);  $^{13}\text{C NMR}$  (100 MHz,  $\text{CDCl}_3$ )  $\delta$  ppm 170.0, 146.2, 136.2, 133.5, 131.6, 128.74, 128.69, 128.0, 127.8, 127.5, 127.1, 51.0, 42.7, 23.0. **HRMS (ESI)**  $m/z$ :  $[\text{M}+\text{Na}]^+$  calcd for  $\text{C}_{16}\text{H}_{17}\text{NNaO}_3\text{S}_2^+$  358.0548, found 358.0554.

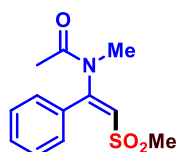

(*E*)-*N*-methyl-*N*-(2-(methylsulfonyl)-1-phenylvinyl)acetamide (**3oa**): 32.9 mg, 43% yield, light yellow oil. Purification by flash chromatography (PE/EA = 3-1).  $^1\text{H NMR}$

(400 MHz, CDCl<sub>3</sub>)  $\delta$  ppm 7.64 – 7.40 (m, 5H), 6.42 (s, 1H), 3.02 (s, 3H), 2.80 (s, 3H), 2.17 (s, 3H); <sup>13</sup>C NMR (100 MHz, CDCl<sub>3</sub>)  $\delta$  ppm 170.5, 153.4, 132.2, 131.6, 129.6, 128.7, 125.5, 43.4, 36.0, 23.0, HRMS (ESI) m/z: [M+Na]<sup>+</sup> calcd for C<sub>12</sub>H<sub>15</sub>NNaO<sub>3</sub>S<sup>+</sup> 276.0665, found 276.0706.

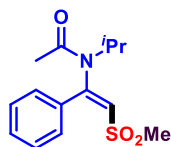

(*E*)-*N*-isopropyl-*N*-(2-(methylsulfonyl)-1-phenylvinyl)acetamide (**3pa**): 32.8 mg, 39% yield, light yellow oil. Purification by flash chromatography (PE/EA = 3-2). <sup>1</sup>H NMR (400 MHz, CDCl<sub>3</sub>)  $\delta$  ppm 7.65 – 7.59 (m, 2H), 7.57 – 7.51 (m, 1H), 7.51 – 7.45 (m, 2H), 6.39 (s, 1H), 4.49 – 7.35 (m, 1H), 2.79 (s, 3H), 2.20 (s, 3H), 1.10 (d, *J* = 6.9 Hz, 6H); <sup>13</sup>C NMR (100 MHz, CDCl<sub>3</sub>)  $\delta$  ppm 169.4, 151.5, 133.6, 131.8, 130.1, 129.7, 128.6, 49.7, 42.9, 23.8, 20.7. HRMS (ESI) m/z: [M+Na]<sup>+</sup> calcd for C<sub>14</sub>H<sub>19</sub>NNaO<sub>3</sub>S<sup>+</sup> 304.0983, found 304.09981.

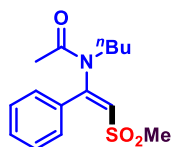

(*E*)-*N*-butyl-*N*-(2-(methylsulfonyl)-1-phenylvinyl)acetamide (**3qa**): 52.5 mg, 59% yield, light yellow oil. Purification by flash chromatography (PE/EA = 3-2). <sup>1</sup>H NMR (400 MHz, CDCl<sub>3</sub>)  $\delta$  ppm 7.52 – 7.34 (m, 5H), 6.32 (s, 1H), 3.32 – 3.21 (m, 2H), 2.72 (s, 3H), 2.17 (s, 3H), 1.44 – 1.33 (m, 2H), 1.23 – 1.11 (m, 2H), 0.78 (t, *J* = 7.3 Hz, 3H); <sup>13</sup>C NMR (100 MHz, CDCl<sub>3</sub>)  $\delta$  ppm 169.7, 152.3, 131.9, 131.5, 129.6, 128.7, 127.0, 46.6, 43.2, 30.1, 23.0, 19.8, 13.6. HRMS (ESI) m/z: [M+Na]<sup>+</sup> calcd for C<sub>15</sub>H<sub>21</sub>NNaO<sub>3</sub>S<sup>+</sup> 318.1140, found 318.1148.

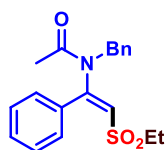

(*E*)-*N*-benzyl-*N*-(2-(ethylsulfonyl)-1-phenylvinyl)acetamide (**3ab**): 80.2 mg, 78% yield, colorless oil. Purification by flash chromatography (PE/EA = 2-1). <sup>1</sup>H NMR (400 MHz, CDCl<sub>3</sub>) δ ppm 7.52 – 7.40 (m, 5H), 7.33 – 7.23 (m, 3H), 7.18 – 7.13 (m, 2H), 6.13 (s, 1H), 4.60 (s, 2H), 2.75 (q, *J* = 7.4 Hz, 2H), 2.21 (s, 3H), 1.17 (t, *J* = 7.4 Hz, 3H); <sup>13</sup>C NMR (100 MHz, CDCl<sub>3</sub>) δ ppm 170.1, 152.2, 136.2, 132.1, 131.4, 129.6, 128.6, 128.5, 128.2, 127.7, 125.4, 50.4, 49.5, 23.0, 6.5; HRMS (ESI) *m/z*: [M+Na]<sup>+</sup> calcd for C<sub>19</sub>H<sub>21</sub>NNaO<sub>3</sub>S<sup>+</sup> 366.1140, found 366.1142.

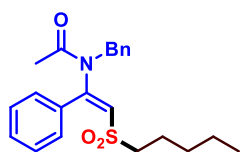

(*E*)-*N*-benzyl-*N*-(2-(pentylsulfonyl)-1-phenylvinyl)acetamide (**3ac**): 64.3 mg, 56% yield, light yellow oil. Purification by flash chromatography (PE/EA = 5-3). <sup>1</sup>H NMR (400 MHz, CDCl<sub>3</sub>) δ ppm 7.56 – 7.43 (m, 5H), 7.34 – 7.24 (m, 3H), 7.18 – 7.14 (m, 2H), 6.12 (s, 1H), 4.62 (s, 2H), 2.72 – 2.66 (m, 2H), 2.21 (s, 3H), 1.62 – 1.56 (m, 2H), 1.25 – 1.18 (m, 4H), 0.84 (t, *J* = 7.0 Hz, 3H); <sup>13</sup>C NMR (100 MHz, CDCl<sub>3</sub>) δ ppm 170.1, 151.9, 136.3, 132.2, 131.4, 129.7, 128.6, 128.5, 128.2, 127.7, 126.0, 55.1, 50.4, 30.2, 23.1, 21.9, 21.6, 13.6; HRMS (ESI) *m/z*: [M+Na]<sup>+</sup> calcd for C<sub>22</sub>H<sub>27</sub>NNaO<sub>3</sub>S<sup>+</sup> 408.1609, found 408.1606.

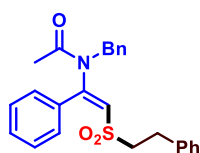

(*E*)-*N*-benzyl-*N*-(2-(phenethylsulfonyl)-1-phenylvinyl)acetamide (**3ad**): 45.5 mg, 36% yield, light yellow solid. Purification by flash chromatography (PE/EA = 4-2). <sup>1</sup>H NMR (400 MHz, CDCl<sub>3</sub>) δ ppm 7.53 – 7.43 (m, 5H), 7.32 – 7.21 (m, 6H), 7.18 – 7.14 (m, 2H), 7.04 – 6.97 (m, 2H), 6.13 (s, 1H), 4.60 (s, 2H), 3.01 – 2.95 (m, 2H), 2.93 – 2.87 (m, 2H), 2.18 (s, 3H); <sup>13</sup>C NMR (100 MHz, CDCl<sub>3</sub>) δ ppm 170.2, 152.4, 137.2, 136.2, 132.2, 131.5, 129.7, 128.8, 128.7, 128.6, 128.21, 128.17, 127.8, 126.9, 125.5, 56.5, 50.6, 28.2, 23.2; HRMS (ESI) *m/z*: [M+Na]<sup>+</sup> calcd for C<sub>25</sub>H<sub>25</sub>NNaO<sub>3</sub>S<sup>+</sup>

442.1453, found 442.4158.

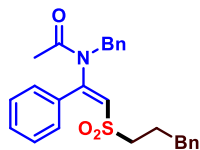

(*E*)-*N*-benzyl-*N*-(1-phenyl-2-((3-phenylpropyl)sulfonyl)vinyl)acetamide (**3ae**): 58.7 mg, 45% yield, light yellow oil. Purification by flash chromatography (PE/EA = 4-2).  $^1\text{H NMR}$  (400 MHz,  $\text{CDCl}_3$ )  $\delta$  ppm 7.48 (dd,  $J = 8.5, 4.3$  Hz, 1H), 7.40 (d,  $J = 4.3$  Hz, 4H), 7.30 – 7.20 (m, 6H), 7.16 – 7.11 (m, 2H), 7.05 – 7.00 (m, 2H), 6.09 (s, 1H), 4.59 (s, 2H), 2.70 – 2.63 (m, 2H), 2.58 (t,  $J = 7.3$  Hz, 2H), 2.15 (s, 3H), 1.98 – 1.86 (m, 2H);  $^{13}\text{C NMR}$  (100 MHz,  $\text{CDCl}_3$ )  $\delta$  ppm 170.2, 152.1, 139.6, 136.2, 132.1, 131.4, 129.6, 128.6, 128.5, 128.3, 128.2, 127.8, 126.4, 125.8, 54.3, 50.4, 33.9, 23.5, 23.1; HRMS (ESI)  $m/z$ :  $[\text{M}+\text{Na}]^+$  calcd for  $\text{C}_{26}\text{H}_{27}\text{NNaO}_3\text{S}^+$  456.1609, found 456.1608.

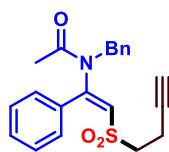

(*E*)-*N*-benzyl-*N*-(2-(but-3-yn-1-ylsulfonyl)-1-phenylvinyl)acetamide (**3af**): 14.3 mg, 13% yield, yellow oil. Purification by flash chromatography (PE/EA = 4-2).  $^1\text{H NMR}$  (400 MHz,  $\text{CDCl}_3$ )  $\delta$  ppm 7.56 – 7.50 (m, 1H), 7.46 (d,  $J = 4.3$  Hz, 4H), 7.36 – 7.28 (m, 3H), 7.18 – 7.14 (m, 2H), 6.21 (s, 1H), 4.64 (s, 2H), 2.96 (t,  $J = 7.6$  Hz, 2H), 2.54 (td,  $J = 7.6, 2.7$  Hz, 2H), 2.21 (s, 3H), 1.94 (t,  $J = 2.7$  Hz, 1H);  $^{13}\text{C NMR}$  (100 MHz,  $\text{CDCl}_3$ )  $\delta$  ppm 170.4, 153.0, 136.3, 132.1, 131.6, 129.8, 128.8, 128.6, 128.1, 127.9, 124.8, 79.4, 70.9, 53.8, 50.7, 23.4, 12.7; HRMS (ESI)  $m/z$ :  $[\text{M}+\text{Na}]^+$  calcd for  $\text{C}_{21}\text{H}_{21}\text{NNaO}_3\text{S}^+$  390.1140, found 390.1147.

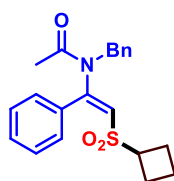

(*E*)-*N*-benzyl-*N*-(2-(cyclobutylsulfonyl)-1-phenylvinyl)acetamide (**3ag**): 77.4 mg, 70% yield, light yellow oil. Purification by flash chromatography (PE/EA = 4-2). <sup>1</sup>H NMR (400 MHz, CDCl<sub>3</sub>) δ ppm 7.54 – 7.42 (m, 5H), 7.33 – 7.25 (m, 3H), 7.15 (d, *J* = 6.7 Hz, 2H), 6.03 (s, 1H), 4.57 (s, 2H), 3.49 (quint, *J* = 8.2 Hz, 1H), 2.43 – 2.31 (m, 2H), 2.18 (s, 3H), 2.07 – 1.99 (m, 2H), 1.95 – 1.85 (m, 2H); <sup>13</sup>C NMR (100 MHz, CDCl<sub>3</sub>) δ ppm 169.9, 152.2, 136.2, 132.0, 131.3, 129.7, 128.5, 128.3, 128.1, 127.6, 124.5, 55.6, 50.2, 22.9, 21.8, 16.7; HRMS (ESI) *m/z*: [M+Na]<sup>+</sup> calcd for C<sub>21</sub>H<sub>23</sub>NNaO<sub>3</sub>S<sup>+</sup> 392.1296, found 392.1297.

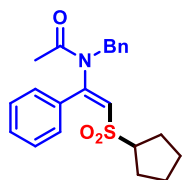

(*E*)-*N*-benzyl-*N*-(2-(cyclohexylsulfonyl)-1-phenylvinyl)acetamide (**3ah**): 42.3 mg, 37% yield, yellow oil. Purification by flash chromatography (PE/EA = 4-2). <sup>1</sup>H NMR (400 MHz, CDCl<sub>3</sub>) δ ppm 7.54 – 7.49 (m, 3H), 7.49 – 7.40 (m, 2H), 7.33 – 7.26 (m, 3H), 7.20 – 7.14 (m, 2H), 6.10 (s, 1H), 4.60 (s, 2H), 3.20 – 3.08 (m, 1H), 2.23 (s, 3H), 1.98 – 1.89 (m, 2H), 1.83 – 1.76 (m, 2H), 1.73 – 1.67 (m, 2H), 1.60 – 1.50 (m, 2H); <sup>13</sup>C NMR (100 MHz, CDCl<sub>3</sub>) δ ppm 170.2, 151.9, 136.4, 132.3, 131.4, 129.8, 128.7, 128.5, 128.3, 127.8, 125.8, 63.1, 50.6, 26.7, 26.0, 23.1; HRMS (ESI) *m/z*: [M+Na]<sup>+</sup> calcd for C<sub>22</sub>H<sub>25</sub>NNaO<sub>3</sub>S<sup>+</sup> 406.1453, found 406.1454.

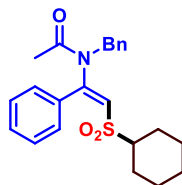

(*E*)-*N*-benzyl-*N*-(2-(cyclohexylsulfonyl)-1-phenylvinyl)acetamide (**3ai**): 75.1 mg, 63% yield, orange-yellow oil. Purification by flash chromatography (PE/EA = 4-2). <sup>1</sup>H NMR (400 MHz, CDCl<sub>3</sub>) δ ppm 7.52 – 7.40 (m, 5H), 7.34 – 7.26 (m, 3H), 7.20 – 7.14 (m, 2H), 6.06 (s, 1H), 4.62 (s, 2H), 2.52 (tt, *J* = 12.1, 3.3 Hz, 1H), 2.22 (s, 3H), 1.90 (d, *J* = 12.2 Hz, 2H), 1.84 – 1.76 (m, 2H), 1.67 – 1.59 (m, 1H), 1.31 (ddd, *J* =

24.9, 12.5, 3.3 Hz, 2H), 1.10 (s, 3H);  $^{13}\text{C}$  NMR (100 MHz,  $\text{CDCl}_3$ )  $\delta$  ppm 170.1, 151.9, 136.4, 132.2, 131.1, 129.5, 128.6, 128.2, 128.1, 127.6, 124.1, 62.8, 50.2, 24.8, 24.6, 23.0; HRMS (ESI)  $m/z$ :  $[\text{M}+\text{Na}]^+$  calcd for  $\text{C}_{23}\text{H}_{27}\text{NNaO}_3\text{S}^+$  420.1609, found 420.1613.

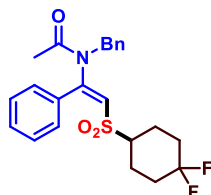

(*E*)-*N*-benzyl-*N*-(2-((4,4-difluorocyclohexyl)sulfonyl)-1-phenylvinyl)acetamide

**(3aj)**: 46.0 mg, 35% yield, light yellow oil. Purification by flash chromatography (PE/EA = 4-2).  $^1\text{H}$  NMR (400 MHz,  $\text{CDCl}_3$ )  $\delta$  ppm 7.51 (dt,  $J = 5.4, 2.9$  Hz, 1H), 7.47 -7.41 (m, 4H), 7.31 (ddd,  $J = 18.6, 11.3, 5.8$  Hz, 3H), 7.19-7.13 (m, 2H), 6.12 (s, 1H), 4.63 (s, 2H), 2.55 (t,  $J = 11.2$  Hz, 1H), 2.20 (s, 3H), 1.95 (d,  $J = 13.1$  Hz, 2H), 1.87-1.45 (m, 5H);  $^{13}\text{C}$  NMR (100 MHz,  $\text{CDCl}_3$ )  $\delta$  ppm 170.5, 152.8, 136.3, 132.1, 131.3, 129.6, 128.8, 128.4, 128.0, 127.8, 123.2, 121.6 (t,  $J = 240.0$  Hz), 60.0, 50.7, 32.0 (t,  $J = 25.0$  Hz), 23.3, 21.53 (d,  $J = 9.2$  Hz);  $^{19}\text{F}$  NMR (376 MHz,  $\text{CDCl}_3$ )  $\delta$  ppm -94.17 (d,  $J = 240.0$  Hz), -100.25 – -103.53 (m); HRMS (ESI)  $m/z$ :  $[\text{M}+\text{Na}]^+$  calcd for  $\text{C}_{23}\text{H}_{25}\text{F}_2\text{NNaO}_3\text{S}^+$  456.1421, found 456.1420.

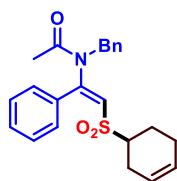

(*E*)-*N*-benzyl-*N*-(2-(cyclohex-3-en-1-ylsulfonyl)-1-phenylvinyl)acetamide (**3ak**): 32.9 mg, 28% yield, colorless oil. Purification by flash chromatography (PE/EA = 4-2).  $^1\text{H}$  NMR (400 MHz,  $\text{CDCl}_3$ )  $\delta$  ppm 7.52 – 7.41 (m, 5H), 7.35 – 7.26 (m, 3H), 7.19 – 7.15 (m, 2H), 6.09 (s, 1H), 5.69 – 5.64 (m, 1H), 5.62 – 5.56 (m, 1H), 4.68 (d,  $J = 15.1$  Hz, 1H), 4.57 (d,  $J = 15.1$  Hz, 1H), 2.86 – 2.77 (m, 1H), 2.23 – 2.14 (m, 6H), 2.05 – 1.94 (m, 2H), 1.61 – 1.49 (m, 1H);  $^{13}\text{C}$  NMR (100 MHz,  $\text{CDCl}_3$ )  $\delta$  ppm 170.3, 152.5, 136.4, 132.2, 131.3, 129.7, 128.7, 128.4, 128.2, 127.8, 126.6, 123.9, 123.3, 59.6, 50.5,



24.2, 23.8, 23.2, 21.0; **HRMS (ESI)**  $m/z$ :  $[M+Na]^+$  calcd for  $C_{23}H_{25}NNaO_3S^+$  418.1453, found 418.1459.

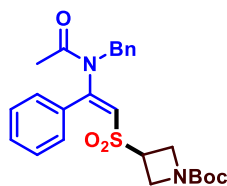

tert-butyl(*E*)-3-((2-(*N*-benzylacetamido)-2-phenylvinyl)sulfonyl)azetidine-1-carboxylate (**3al**): 76.4 mg, 54% yield, light yellow oil. Purification by flash chromatography (PE/EA = 4-2). **<sup>1</sup>H NMR (400 MHz, CDCl<sub>3</sub>)**  $\delta$  ppm 7.59 – 7.52 (m, 1H), 7.49 – 7.43 (m, 4H), 7.36 – 7.28 (m, 3H), 7.17 – 7.12 (m, 2H), 6.11 (s, 1H), 4.63 (s, 2H), 4.02 (d,  $J = 4.7$  Hz, 2H), 3.90 (t,  $J = 9.0$  Hz, 2H), 3.55 (tt,  $J = 8.4, 5.6$  Hz, 1H), 2.15 (s, 3H), 1.40 (s, 9H); **<sup>13</sup>C NMR (100 MHz, CDCl<sub>3</sub>)**  $\delta$  ppm 170.3, 155.4, 153.9, 136.1, 132.0, 131.8, 129.8, 128.8, 128.6, 128.0, 127.9, 122.7, 80.5, 50.9, 50.3, 28.1, 23.3; **HRMS (ESI)**  $m/z$ :  $[M+Na]^+$  calcd for  $C_{25}H_{30}N_2NaO_5S^+$  493.1773, found 493.1779.

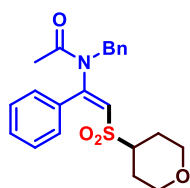

(*E*)-*N*-benzyl-*N*-(1-phenyl-2-((tetrahydro-2H-pyran-4-yl)sulfonyl)vinyl)acetamide (**3am**): 54.2 mg, 45% yield, colorless oil. Purification by flash chromatography (PE/EA = 4-2). **<sup>1</sup>H NMR (400 MHz, CDCl<sub>3</sub>)**  $\delta$  ppm 7.55 - 7.49 (m, 1H), 7.45 (d,  $J = 4.4$  Hz, 4H), 7.36 – 7.26 (m, 3H), 7.19 – 7.15 (m, 2H), 6.10 (s, 1H), 4.63 (s, 2H), 3.99 (dt,  $J = 11.5, 3.3$  Hz, 2H), 3.23 – 3.15 (m, 2H), 2.80 – 2.69 (m, 1H), 2.20 (s, 3H), 1.73 – 1.67 (m, 4H); **<sup>13</sup>C NMR (100 MHz, CDCl<sub>3</sub>)**  $\delta$  ppm 170.4, 152.7, 136.3, 132.2, 131.3, 129.6, 128.7, 128.4, 128.0, 127.8, 123.2, 66.2, 59.9, 50.6, 24.7, 23.3; **HRMS (ESI)**  $m/z$ :  $[M+Na]^+$  calcd for  $C_{22}H_{25}NNaO_4S^+$  422.1402, found 422.1407.

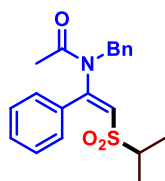

(*E*)-*N*-benzyl-*N*-(2-(isopropylsulfonyl)-1-phenylvinyl)acetamide (**3an**): 76.1 mg, 71% yield, light yellow solid. Purification by flash chromatography (PE/EA = 4-2). <sup>1</sup>H NMR (400 MHz, CDCl<sub>3</sub>) δ ppm 7.53 – 7.41 (m, 5H), 7.35 – 7.26 (m, 3H), 7.19 – 7.14 (m, 2H), 6.10 (s, 1H), 4.60 (s, 2H), 2.91 – 2.79 (m, 1H), 2.23 (s, 3H), 1.20 (d, *J* = 4.0 Hz, 6H); <sup>13</sup>C NMR (100 MHz, CDCl<sub>3</sub>) δ ppm 170.2, 152.4, 136.4, 132.2, 131.2, 129.6, 128.7, 128.3, 128.1, 127.8, 123.9, 54.9, 50.5, 23.1, 15.0; HRMS (ESI) *m/z*: [M+Na]<sup>+</sup> calcd for C<sub>20</sub>H<sub>23</sub>NNaO<sub>3</sub>S<sup>+</sup> 380.1296, found 380.1302.

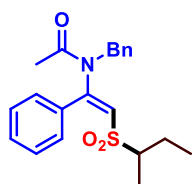

(*E*)-*N*-benzyl-*N*-(2-(sec-butylsulfonyl)-1-phenylvinyl)acetamide (**3ao**): 48.9 mg, 44% yield, colorless liquid. Purification by flash chromatography (PE/EA = 4-2). <sup>1</sup>H NMR (400 MHz, CDCl<sub>3</sub>) δ ppm 7.54 – 7.39 (m, 5H), 7.35 – 7.24 (m, 3H), 7.19 – 7.12 (m, 2H), 6.08 (s, 1H), 4.67 – 4.55 (m, 2H), 2.63 – 2.51 (m, 1H), 2.23 (s, 3H), 1.90 – 1.81 (m, 1H), 1.40 – 1.31 (m, 1H), 1.19 (d, *J* = 6.9 Hz, 3H), 0.90 (t, *J* = 7.5 Hz, 3H); <sup>13</sup>C NMR (100 MHz, CDCl<sub>3</sub>) δ ppm 170.3, 152.3, 136.5, 132.4, 131.3, 129.8, 128.8, 128.4, 128.2, 127.9, 124.5, 61.0, 50.6, 23.3, 22.1, 12.0, 11.1; HRMS (ESI) *m/z*: [M+Na]<sup>+</sup> calcd for C<sub>21</sub>H<sub>25</sub>NNaO<sub>3</sub>S<sup>+</sup> 394.1453, found 394.1454.

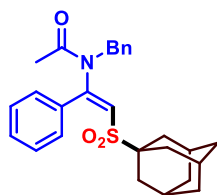

((*E*)-2-(((1*S*,3*S*,5*S*)-adamantan-1-yl)sulfonyl)-1-phenylvinyl)-*N*-benzylacetamide (**3ap**): 41.8 mg, 31% yield, colorless liquid. Purification by flash chromatography (PE/EA = 4-3). <sup>1</sup>H NMR (400 MHz, CDCl<sub>3</sub>) δ ppm 7.51 – 7.39 (m, 5H), 7.36 – 7.26 (m, 3H), 7.20 – 7.16 (m, 2H), 6.10 (s, 1H), 4.61 (s, 2H), 2.25 (s, 3H), 2.09 (s, 3H), 1.81 (d, *J* = 2.5 Hz, 6H), 1.69 (d, *J* = 12.5 Hz, 3H), 1.59 (d, *J* = 12.0 Hz, 3H); <sup>13</sup>C NMR (100 MHz, CDCl<sub>3</sub>) δ ppm 170.3, 152.7, 136.6, 132.2, 130.9, 129.7, 128.7,

128.03, 128.02, 127.7, 120.4, 60.9, 50.3, 35.6, 34.3, 28.0, 23.1; **HRMS (ESI)** m/z: [M+Na]<sup>+</sup> calcd for C<sub>27</sub>H<sub>31</sub>NNaO<sub>3</sub>S<sup>+</sup> 472.1922, found 472.1926.

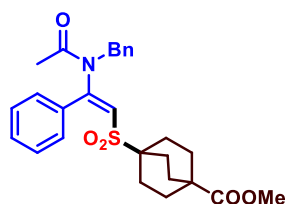

methyl(*E*)-4-((2-(*N*-benzylacetamido)-2-phenylvinyl)sulfonyl)bicyclo[2.2.2]octane-1-carboxylate (**3aq**): 43.1 mg, yield: 37%, milky white solid. Purification by flash chromatography (PE/EA = 4-2) **<sup>1</sup>H NMR (400 MHz, CDCl<sub>3</sub>)** δ ppm 7.49 – 7.39 (m, 5H), 7.34 (ddd, *J* = 8.6, 7.6, 6.1 Hz, 3H), 7.20 – 7.16 (m, 2H), 6.08 (s, 1H), 4.64 (s, 2H), 3.65 (s, 3H), 2.20 (s, 3H), 1.80 (dd, *J* = 10.6, 4.3 Hz, 6H), 1.73 (dd, *J* = 10.6, 4.3 Hz, 6H); **<sup>13</sup>C NMR (100 MHz, CDCl<sub>3</sub>)** δ ppm 176.5, 170.3, 152.7, 136.6, 132.1, 131.0, 129.7, 128.7, 128.0, 127.9, 127.7, 120.8, 59.6, 51.9, 50.6, 38.7, 27.4, 23.7, 23.1; **HRMS (ESI)** m/z: [M+Na]<sup>+</sup> calcd for C<sub>27</sub>H<sub>31</sub>NNaO<sub>5</sub>S<sup>+</sup> 504.1821, found 504.1816.

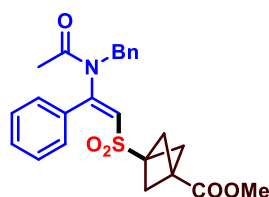

methyl(*E*)-3-((2-(*N*-benzylacetamido)-2-phenylvinyl)sulfonyl)bicyclo[1.1.1]pentane-1-carboxylate (**3ar**): 69.3 mg, 53% yield:, light yellow oil. Purification by flash chromatography (PE/EA = 4-2). **<sup>1</sup>H NMR (400 MHz, CDCl<sub>3</sub>)** δ ppm 7.51 (dq, *J* = 8.3, 4.3 Hz, 1H), 7.43 (d, *J* = 4.4 Hz, 4H), 7.36 – 7.27 (m, 3H), 7.16 – 7.12 (m, 2H), 6.10 (s, 1H), 4.60 (s, 2H), 3.68 (s, 3H), 2.24 (s, 3H), 2.21 (s, 6H); **<sup>13</sup>C NMR (100 MHz, CDCl<sub>3</sub>)** δ ppm 170.1, 168.0, 153.5, 136.2, 131.8, 131.4, 129.7, 128.7, 128.3, 128.0, 127.8, 122.4, 52.1, 51.8, 51.3, 50.3, 36.3, 23.0. **HRMS (ESI)** m/z: [M+Na]<sup>+</sup> calcd for C<sub>24</sub>H<sub>25</sub>NNaO<sub>5</sub>S<sup>+</sup> 462.1351, found 462.1350.

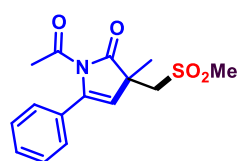

1-acetyl-3-methyl-3-((methylsulfonyl)methyl)-5-phenyl-1,3-dihydro-2*H*-pyrrol-2-one (**5aa**): 80.3 mg, 87% yield, Light white oil. Purification by flash chromatography (PE/EA = 2-1). <sup>1</sup>H NMR (400 MHz, CDCl<sub>3</sub>) δ ppm 7.35 – 7.31 (m, 3H), 7.28 – 7.24 (m, 2H), 5.64 (s, 1H), 3.54 (d, *J* = 14.3 Hz, 1H), 3.39 (d, *J* = 14.2 Hz, 1H), 2.85 (s, 3H), 2.55 (s, 3H), 1.41 (s, 3H); <sup>13</sup>C NMR (100 MHz, CDCl<sub>3</sub>) δ ppm 179.6, 169.2, 143.4, 132.5, 128.4, 127.8, 126.6, 114.8, 60.4, 47.2, 42.7, 25.9, 23.8. HRMS (ESI) *m/z*: [M+Na]<sup>+</sup> calcd for C<sub>15</sub>H<sub>17</sub>NNaO<sub>4</sub>S<sup>+</sup> 330.0776, found 330.0776.

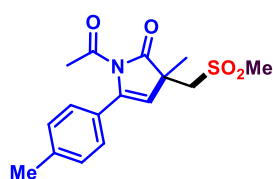

1-acetyl-3-methyl-3-((methylsulfonyl)methyl)-5-(*p*-tolyl)-1,3-dihydro-2*H*-pyrrol-2-one (**5ba**): 81.5 mg, 85% yield, light white oil. Purification by flash chromatography (PE/EA = 2-1). <sup>1</sup>H NMR (400 MHz, CDCl<sub>3</sub>) δ ppm 7.15 (s, 4H), 5.61 (s, 1H), 3.54 (d, *J* = 14.2 Hz, 1H), 3.39 (d, *J* = 14.2 Hz, 1H), 2.87 (s, 3H), 2.55 (s, 3H), 2.35 (s, 3H), 1.42 (s, 3H); <sup>13</sup>C NMR (100 MHz, CDCl<sub>3</sub>) δ ppm 179.7, 169.3, 143.5, 138.4, 129.6, 128.5, 126.6, 114.2, 60.5, 47.3, 42.8, 26.0, 23.9, 21.2. HRMS (ESI) *m/z*: [M+Na]<sup>+</sup> calcd for C<sub>16</sub>H<sub>19</sub>NNaO<sub>4</sub>S<sup>+</sup> 344.0932, found 344.0935.

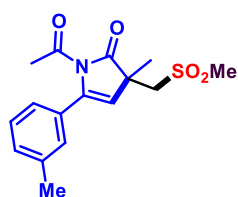

1-acetyl-3-methyl-3-((methylsulfonyl)methyl)-5-(*m*-tolyl)-1,3-dihydro-2*H*-pyrrol-2-one (**5ca**): 72.7 mg, 75% yield, colorless oil. Purification by flash chromatography (PE/EA = 2-1). <sup>1</sup>H NMR (400 MHz, CDCl<sub>3</sub>) δ ppm 7.24 (dd, *J* = 13.4, 5.8 Hz, 1H), 7.15 (d, *J* = 7.6 Hz, 1H), 7.10 – 7.03 (m, 2H), 5.64 (s, 1H), 3.56 (d, *J* = 14.2 Hz, 1H), 3.39 (d, *J* = 14.2 Hz, 1H), 2.89 (s, 3H), 2.56 (s, 3H), 2.35 (s, 3H), 1.43 (s, 3H); <sup>13</sup>C NMR (100 MHz, CDCl<sub>3</sub>) δ ppm 179.7, 169.3, 143.7, 137.6, 132.5, 129.3, 127.7, 127.3, 123.9, 114.5, 60.5, 47.4, 42.9, 26.0, 24.0, 21.3. HRMS (ESI) *m/z*: [M+Na]<sup>+</sup>

calcd for  $C_{16}H_{19}NNaO_4S^+$  344.0932, found 344.0934.

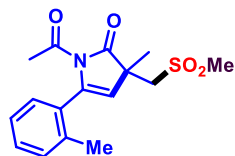

1-acetyl-3-methyl-3-((methylsulfonyl)methyl)-5-(o-tolyl)-1,3-dihydro-2*H*-pyrrol-2-one (**5da**): 72.5 mg, 75% yield, light white oil. Purification by flash chromatography (PE/EA = 2-1).  $^1H$  NMR (400 MHz,  $CDCl_3$ )  $\delta$  ppm 7.29 – 7.24 (m, 1H), 7.20 – 7.14 (m, 3H), 5.53 (s, 1H), 3.62 (d,  $J = 14.1$  Hz, 1H), 3.39 (d,  $J = 14.1$  Hz, 1H), 2.91 (s, 3H), 2.52 (s, 3H), 2.23 (s, 3H), 1.44 (s, 3H);  $^{13}C$  NMR (100 MHz,  $CDCl_3$ )  $\delta$  ppm 179.4, 168.9, 143.2, 132.9, 129.4, 128.6, 128.3, 125.3, 114.4, 60.2, 46.9, 42.8, 25.7, 24.6, 19.6. HRMS (ESI)  $m/z$ :  $[M+Na]^+$  calcd for  $C_{16}H_{19}NNaO_4S^+$  344.0932, found 344.0936.

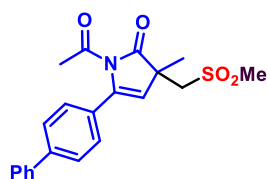

5-([1,1'-biphenyl]-4-yl)-1-acetyl-3-methyl-3-((methylsulfonyl)methyl)-1,3-dihydro-2*H*-pyrrol-2-one (**5ea**): 73.6 mg, 64% yield, colorless oil. Purification by flash chromatography (PE/EA = 2-1).  $^1H$  NMR (400 MHz,  $CDCl_3$ )  $\delta$  ppm 7.61 – 7.55 (m, 4H), 7.43 (t,  $J = 7.5$  Hz, 2H), 7.38 – 7.32 (m, 3H), 5.70 (s, 1H), 3.57 (d,  $J = 14.1$  Hz, 1H), 3.40 (d,  $J = 14.2$  Hz, 1H), 2.88 (s, 3H), 2.59 (s, 3H), 1.43 (s, 3H);  $^{13}C$  NMR (100 MHz,  $CDCl_3$ )  $\delta$  ppm 179.7, 169.4, 143.3, 141.3, 140.3, 131.5, 128.7, 127.4, 127.2, 127.0, 126.5, 114.9, 60.5, 47.4, 42.9, 26.0, 23.9. HRMS (ESI)  $m/z$ :  $[M+Na]^+$  calcd for  $C_{21}H_{21}NNaO_4S^+$  406.1089, found 406.1091.

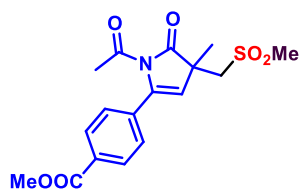

methyl-4-(1-acetyl-4-methyl-4-((methylsulfonyl)methyl)-5-oxo-4,5-dihydro-1*H*-pyrrol-2-yl)benzoate (**5fa**): 40.3 mg, yield:37%, colorless oil. Purification by flash chromatography (PE/EA = 2-1). **<sup>1</sup>H NMR (400 MHz, CDCl<sub>3</sub>)** δ ppm 8.04 – 7.99 (m, 2H), 7.38 – 7.31 (m, 2H), 5.75 (s, 1H), 3.92 (s, 3H), 3.60 (d, *J* = 14.1 Hz, 1H), 3.42 (d, *J* = 14.0 Hz, 1H), 2.92 (s, 3H), 2.58 (s, 3H), 1.46 (s, 3H); **<sup>13</sup>C NMR (100 MHz, CDCl<sub>3</sub>)** δ ppm 179.4, 169.1, 166.5, 142.7, 137.1, 129.9, 129.1, 126.8, 116.1, 60.4, 52.1, 47.5, 42.9, 25.8, 23.9; **HRMS (ESI)** *m/z*: [M+Na]<sup>+</sup> calcd for C<sub>17</sub>H<sub>19</sub>NNaO<sub>6</sub>S<sup>+</sup> 388.0831, found 388.0838.

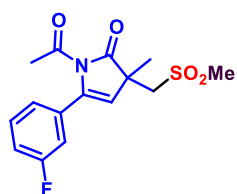

1-acetyl-5-(3-fluorophenyl)-3-methyl-3-((methylsulfonyl)methyl)-1,3-dihydro-2*H*-pyrrol-2-one(**5ga**): 44.2 mg, yield: 45%, colorless oil. Purification by flash chromatography (PE/EA = 2-1). **<sup>1</sup>H NMR (400 MHz, CDCl<sub>3</sub>)** δ ppm 7.32 – 7.27 (m, 1H), 7.07 – 6.96 (m, 3H), 5.70 (s, 1H), 3.58 (d, *J* = 14.0 Hz, 1H), 3.41 (d, *J* = 14.1 Hz, 1H), 2.91 (s, 3H), 2.57 (s, 3H), 1.45 (s, 3H); **<sup>13</sup>C NMR (100 MHz, CDCl<sub>3</sub>)** δ ppm 179.4, 169.2, 162.1 (d, *J* = 245.0 Hz), 142.4 (d, *J* = 2.0 Hz), 134.7 (d, *J* = 9.0 Hz), 129.5 (d, *J* = 8.0 Hz), 122.6 (d, *J* = 3.0 Hz), 115.6, 115.4 (d, *J* = 21.0 Hz), 114.1 (d, *J* = 23.0 Hz), 60.5, 47.4, 42.9, 25.9, 23.9; **<sup>19</sup>F NMR (376 MHz, CDCl<sub>3</sub>)** δ -113.12 – -113.24 (m); **HRMS (ESI)** *m/z*: [M+Na]<sup>+</sup> calcd for C<sub>15</sub>H<sub>16</sub>FN<sub>2</sub>O<sub>4</sub>S<sup>+</sup> 348.0682, found 348.0682.

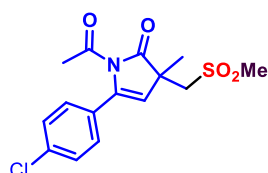

1-acetyl-5-(4-chlorophenyl)-3-methyl-3-((methylsulfonyl)methyl)-1,3-dihydro-2*H*-pyrrol-2-one (**5ha**): 45.5 mg, 44% yield, colorless oil. Purification by flash chromatography (PE/EA = 2-1). **<sup>1</sup>H NMR (400 MHz, CDCl<sub>3</sub>)** δ ppm 7.32 (d, *J* = 8.6

Hz, 2H), 7.21 (d,  $J = 8.6$  Hz, 2H), 5.67 (s, 1H), 3.59 (d,  $J = 14.0$  Hz, 1H), 3.40 (d,  $J = 14.0$  Hz, 1H), 2.92 (s, 3H), 2.57 (s, 3H), 1.46 (s, 3H);  $^{13}\text{C}$  NMR (100 MHz,  $\text{CDCl}_3$ )  $\delta$  ppm 179.5, 169.3, 142.7, 134.5, 131.2, 128.3, 128.1, 115.3, 60.5, 47.4, 43.0, 26.0, 24.0; HRMS (ESI)  $m/z$ :  $[\text{M}+\text{Na}]^+$  calcd for  $\text{C}_{15}\text{H}_{16}^{35}\text{ClNNaO}_4\text{S}^+$  364.0386, found 364.0386,  $[\text{M}+\text{Na}]^+$  calcd for  $\text{C}_{15}\text{H}_{16}^{37}\text{ClNNaO}_4\text{S}^+$  366.0352, found 366.0361.

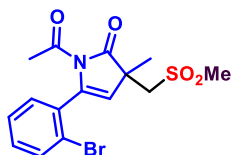

1-acetyl-5-(2-bromophenyl)-3-methyl-3-((methylsulfonyl)methyl)-1,3-dihydro-2H-pyrrol-2-one (**5ia**): 62.0 mg, 53% yield, colorless oil. Purification by flash chromatography (PE/EA = 2-1).  $^1\text{H}$  NMR (400 MHz,  $\text{CDCl}_3$ )  $\delta$  ppm 7.53 (d,  $J = 8.0$  Hz, 1H), 7.30 (dd,  $J = 12.9, 6.0$  Hz, 2H), 7.25 – 7.18 (m, 1H), 5.62 (s, 1H), 3.58 (d,  $J = 12.8$  Hz, 1H), 3.42 (d,  $J = 14.1$  Hz, 1H), 2.92 (s, 3H), 2.53 (s, 3H), 1.46 (s, 3H);  $^{13}\text{C}$  NMR (100 MHz,  $\text{CDCl}_3$ )  $\delta$  ppm 178.7, 168.6, 141.7, 134.5, 131.8, 130.0, 129.8, 127.0, 122.4, 115.7, 60.0, 47.1, 42.8, 25.3, 23.7, 14.0; HRMS (ESI)  $m/z$ :  $[\text{M}+\text{Na}]^+$  calcd for  $\text{C}_{15}\text{H}_{16}^{79}\text{BrNNaO}_4\text{S}^+$  407.9881, found 407.9884,  $[\text{M}+\text{Na}]^+$  calcd for  $\text{C}_{15}\text{H}_{16}^{81}\text{BrNNaO}_4\text{S}^+$  409.9856, found 409.9865.

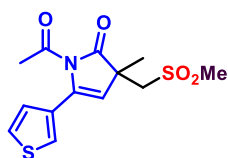

1-acetyl-3-methyl-3-((methylsulfonyl)methyl)-5-(thiophen-3-yl)-1,3-dihydro-2H-pyrrol-2-one (**5ja**): 63.9 mg, 68% yield, light white oil. Purification by flash chromatography (PE/EA = 2-1).  $^1\text{H}$  NMR (400 MHz,  $\text{CDCl}_3$ )  $\delta$  ppm 7.32 – 7.23 (m, 2H), 7.01 (dd,  $J = 5.0, 1.3$  Hz, 1H), 5.71 (s, 1H), 3.55 (d,  $J = 14.1$  Hz, 1H), 3.39 (d,  $J = 14.1$  Hz, 1H), 2.90 (s, 3H), 2.57 (s, 3H), 1.44 (s, 3H);  $^{13}\text{C}$  NMR (100 MHz,  $\text{CDCl}_3$ )  $\delta$  ppm 179.5, 169.4, 138.8, 132.8, 127.2, 124.9, 123.5, 114.5, 60.4, 47.1, 42.9, 26.1, 23.9; HRMS (ESI)  $m/z$ :  $[\text{M}+\text{Na}]^+$  calcd for  $\text{C}_{13}\text{H}_{15}\text{NNaO}_4\text{S}_2^+$  336.0340, found 336.0345.

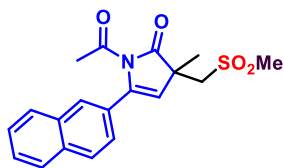

1-acetyl-3-methyl-3-((methylsulfonyl)methyl)-5-(naphthalen-2-yl)-1,3-dihydro-2*H*-pyrrol-2-one (**5ka**): 67.3 mg, 63% yield, light yellow oil. Purification by flash chromatography (PE/EA = 2-1). **<sup>1</sup>H NMR (400 MHz, CDCl<sub>3</sub>)** δ ppm 7.80 (dt, *J* = 13.8, 6.1 Hz, 4H), 7.47 (dd, *J* = 6.2, 3.2 Hz, 2H), 7.30 (dd, *J* = 8.5, 1.8 Hz, 1H), 5.70 (s, 1H), 3.54 (d, *J* = 14.1 Hz, 1H), 3.36 (d, *J* = 14.2 Hz, 1H), 2.83 (s, 3H), 2.58 (s, 3H), 1.41 (s, 3H); **<sup>13</sup>C NMR (100 MHz, CDCl<sub>3</sub>)** δ ppm 179.7, 169.3, 143.6, 133.0, 132.7, 130.3, 128.0, 127.6, 127.2, 126.4, 125.6, 115.1, 60.5, 47.4, 42.8, 26.0, 23.9; **HRMS (ESI)** *m/z*: [M+Na]<sup>+</sup> calcd for C<sub>19</sub>H<sub>19</sub>NNaO<sub>4</sub>S<sup>+</sup> 380.0932, found 380.0936.

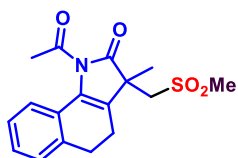

1-acetyl-3-methyl-3-((methylsulfonyl)methyl)-1,3,4,5-tetrahydro-2*H*-benzo[*g*]indol-2-one (**5la**): 66.7 mg, 67% yield, light yellow solid. Purification by flash chromatography (PE/EA = 2-1). **<sup>1</sup>H NMR (400 MHz, CDCl<sub>3</sub>)** δ ppm 7.18 – 7.15 (m, 3H), 6.92 – 6.87 (m, 1H), 3.57 (d, *J* = 14.1 Hz, 1H), 3.42 (d, *J* = 14.1 Hz, 1H), 3.03 (td, *J* = 14.3, 6.7 Hz, 1H), 2.86 – 2.79 (m, 4H), 2.65 (s, 3H), 2.48 – 2.36 (m, 1H), 2.28 – 2.18 (m, 1H), 1.27 (s, 3H); **<sup>13</sup>C NMR (100 MHz, CDCl<sub>3</sub>)** δ ppm 180.3, 169.6, 135.9, 135.2, 127.5, 127.4, 127.3, 126.8, 125.7, 124.0, 60.0, 48.4, 42.4, 27.9, 25.5, 22.3, 20.2; **HRMS (ESI)** *m/z*: [M+Na]<sup>+</sup> calcd for C<sub>17</sub>H<sub>19</sub>NNaO<sub>4</sub>S<sup>+</sup> 356.0932, found 356.0937.



*<sup>1</sup>H, <sup>13</sup>C and <sup>19</sup>F NMR spectra of products*

(*E*)-*N*-benzyl-*N*-(2-(methylsulfonyl)-1-phenylvinyl)acetamide (**3aa**)

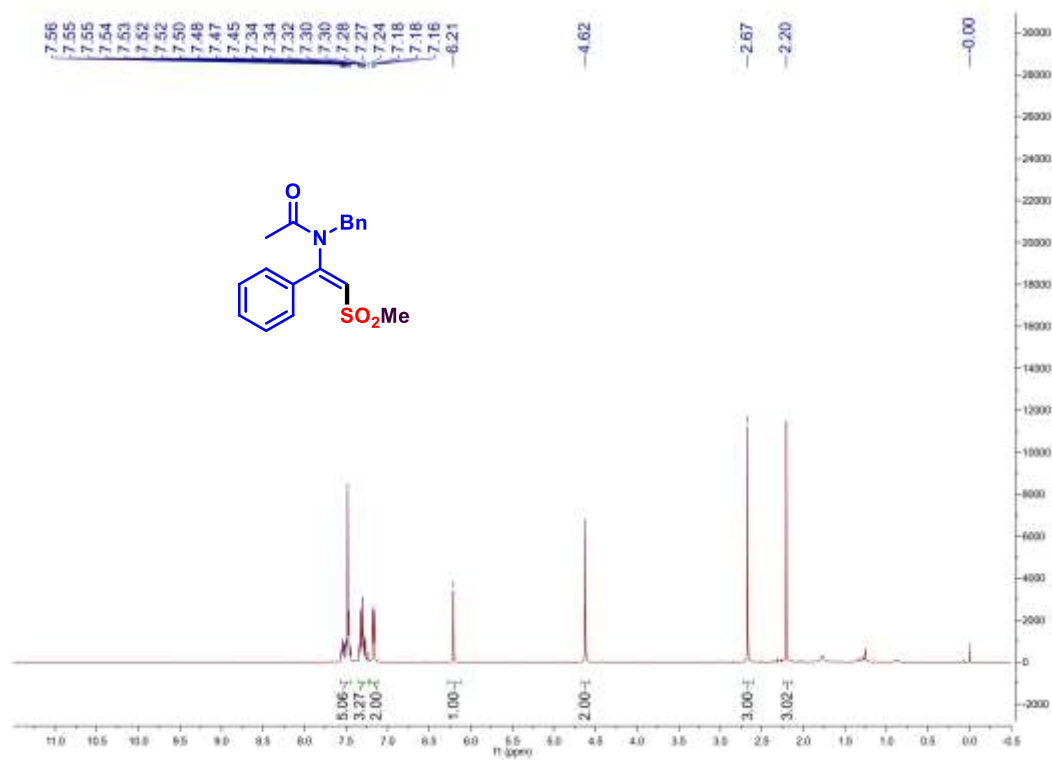

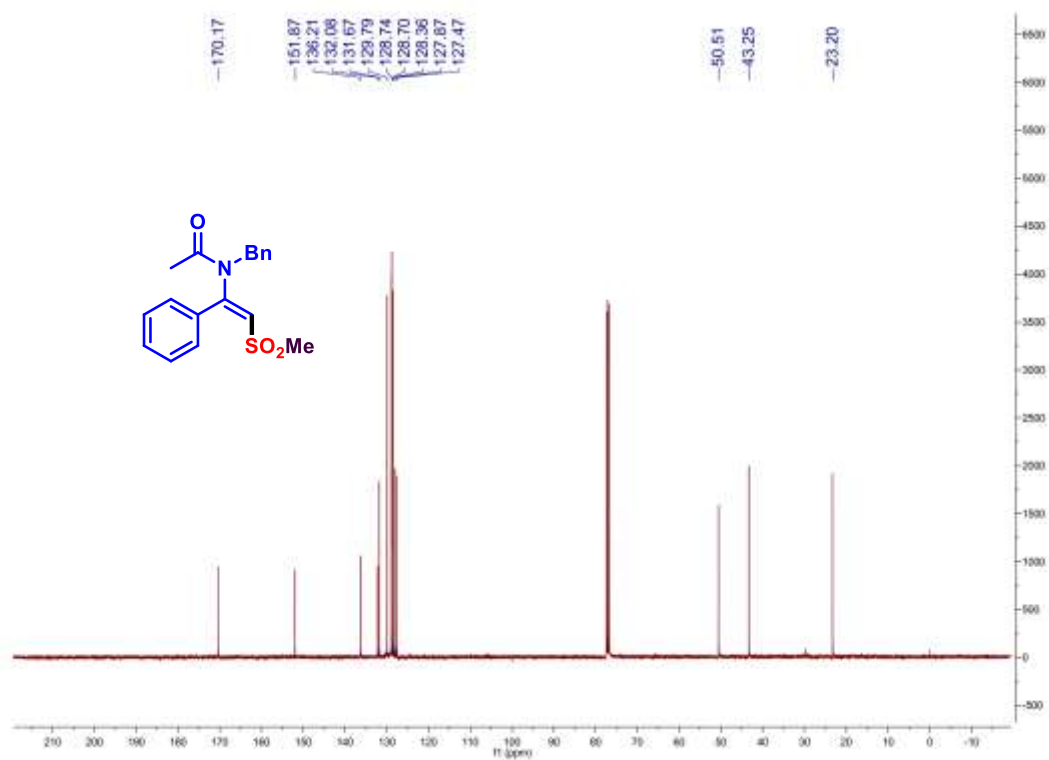

(*E*)-*N*-benzyl-*N*-(2-(methylsulfonyl)-1-(*o*-tolyl)vinyl)acetamide (**3ba**)

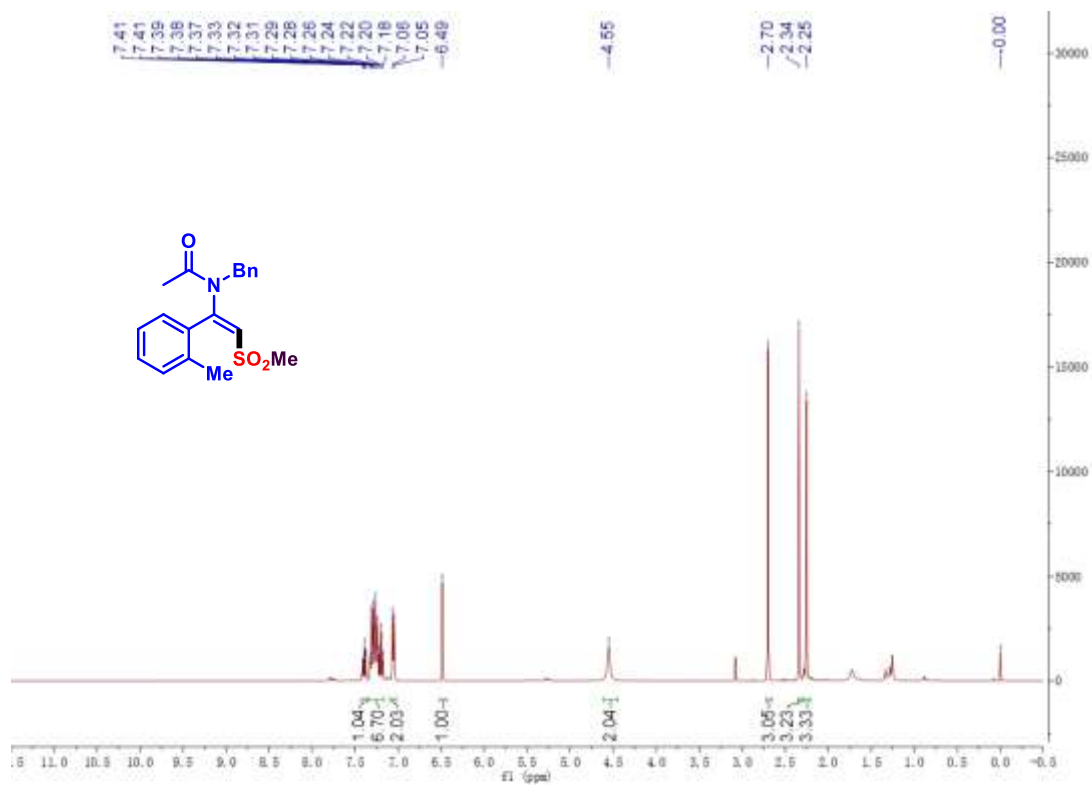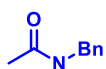

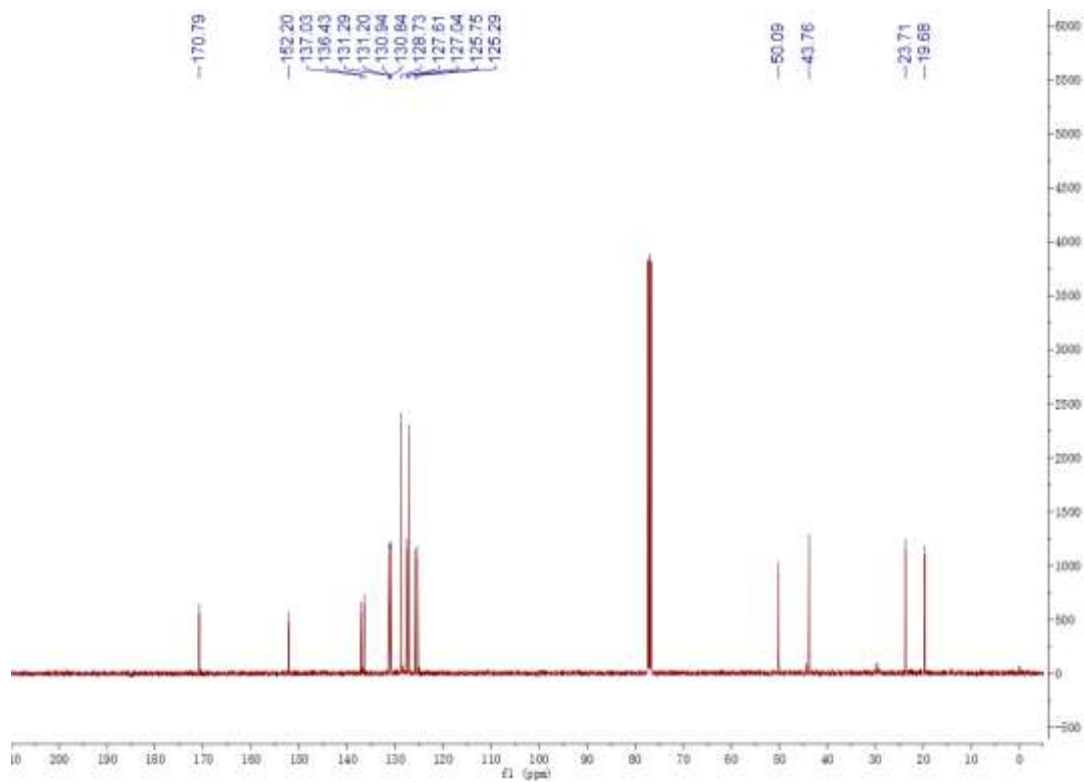

(E)-N-(1-([1,1'-biphenyl]-4-yl)-2-(methylsulfonyl)vinyl)-N-benzylacetamide (**3ca**)

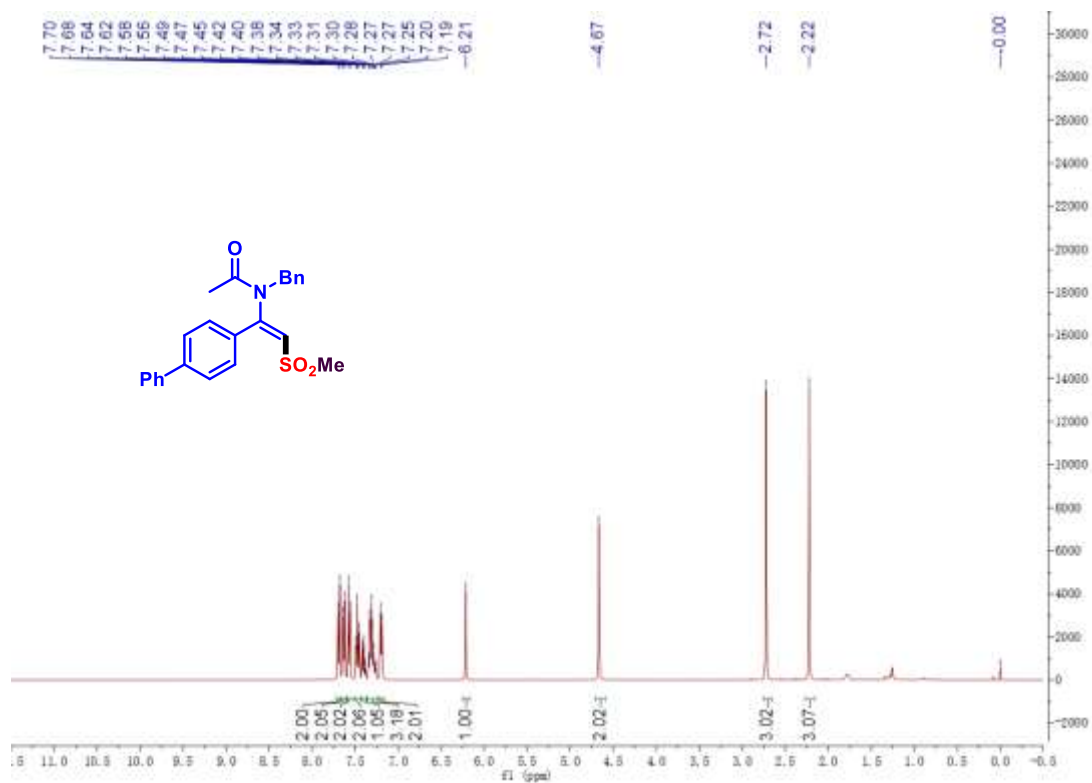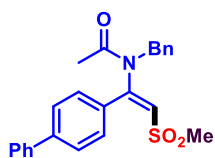

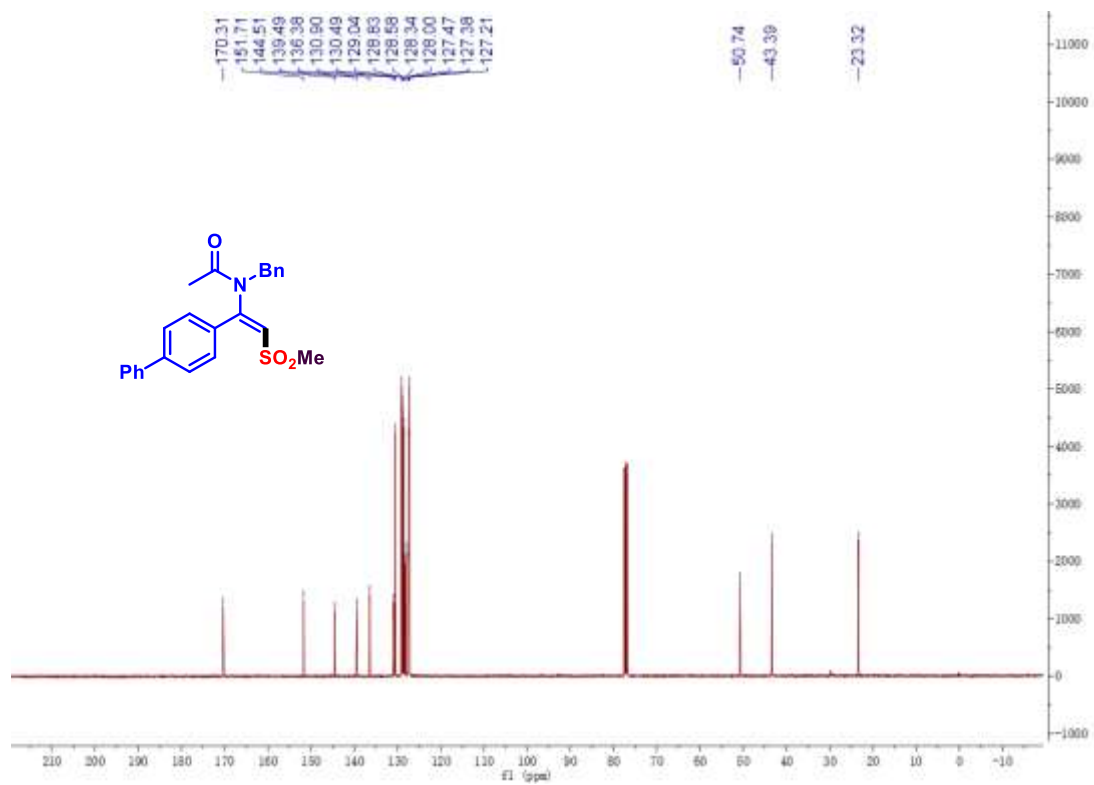

*(E)*-*N*-benzyl-*N*-(1-(4-methoxyphenyl)-2-(methylsulfonyl)vinyl)acetamide (**3da**)

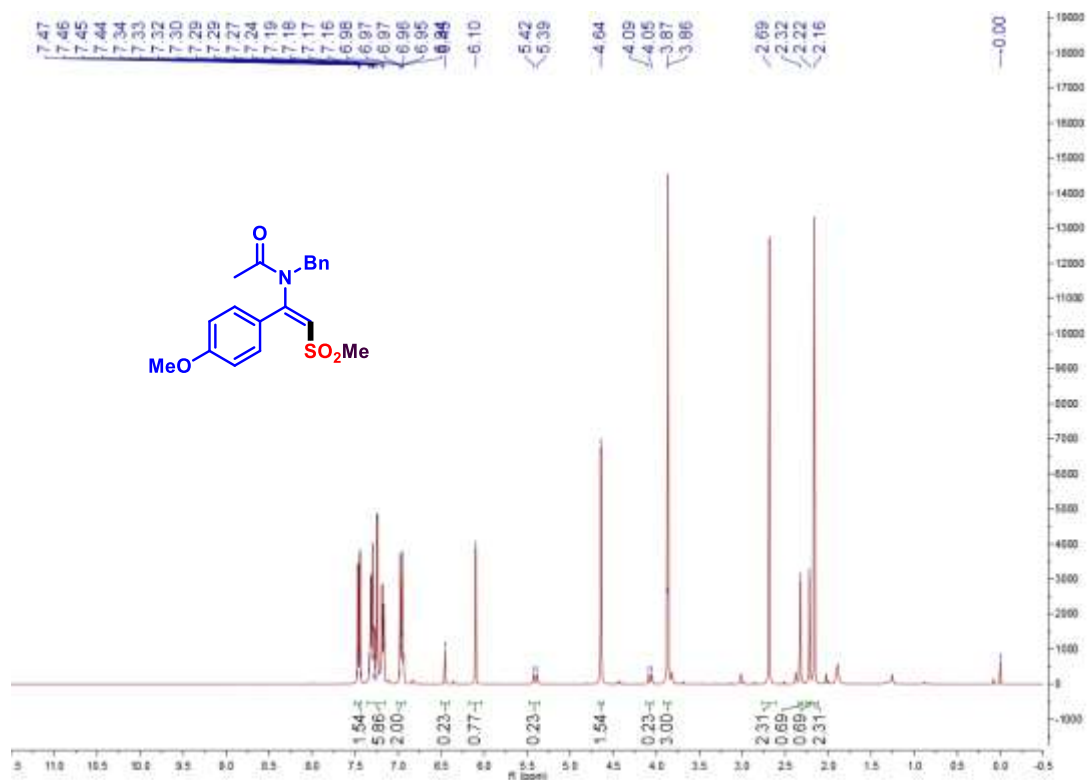

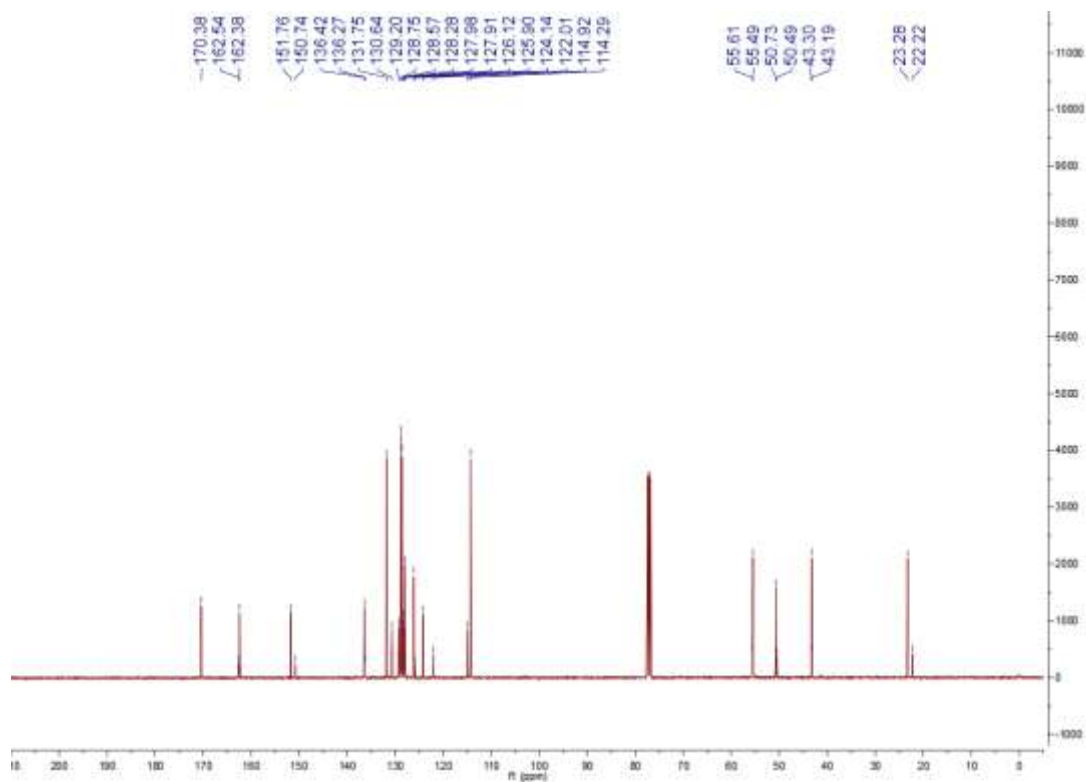

(*E*)-*N*-benzyl-*N*-(1-(2-(benzyloxy)phenyl)-2-(methylsulfonyl)vinyl)acetamide (**3ea**)

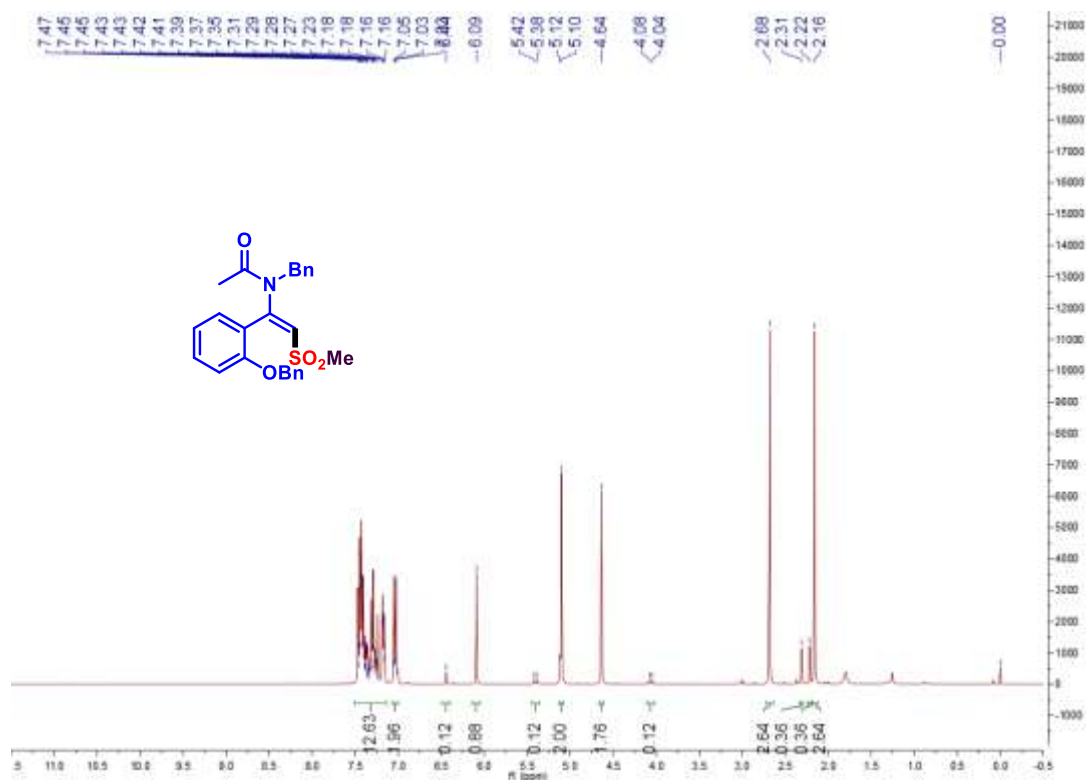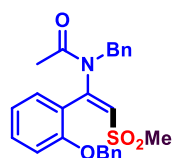

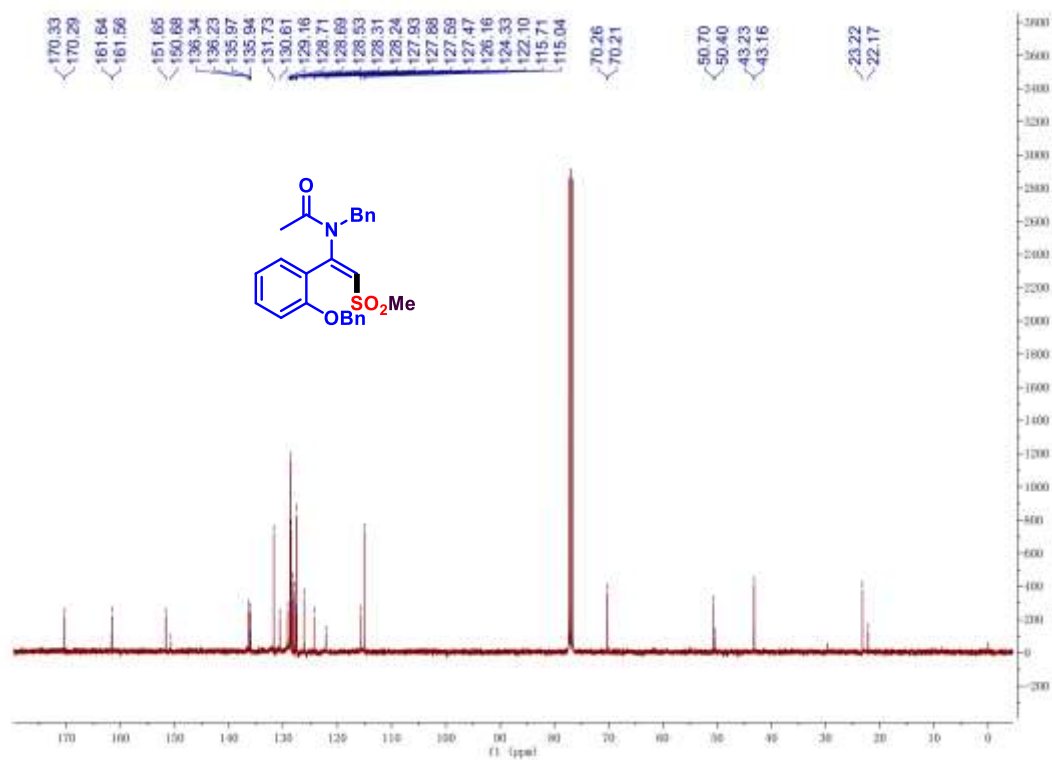

(*E*)-*N*-benzyl-*N*-(2-(methylsulfonyl)-1-(4-(trifluoromethyl)phenyl)vinyl)acetamide  
(3fa)

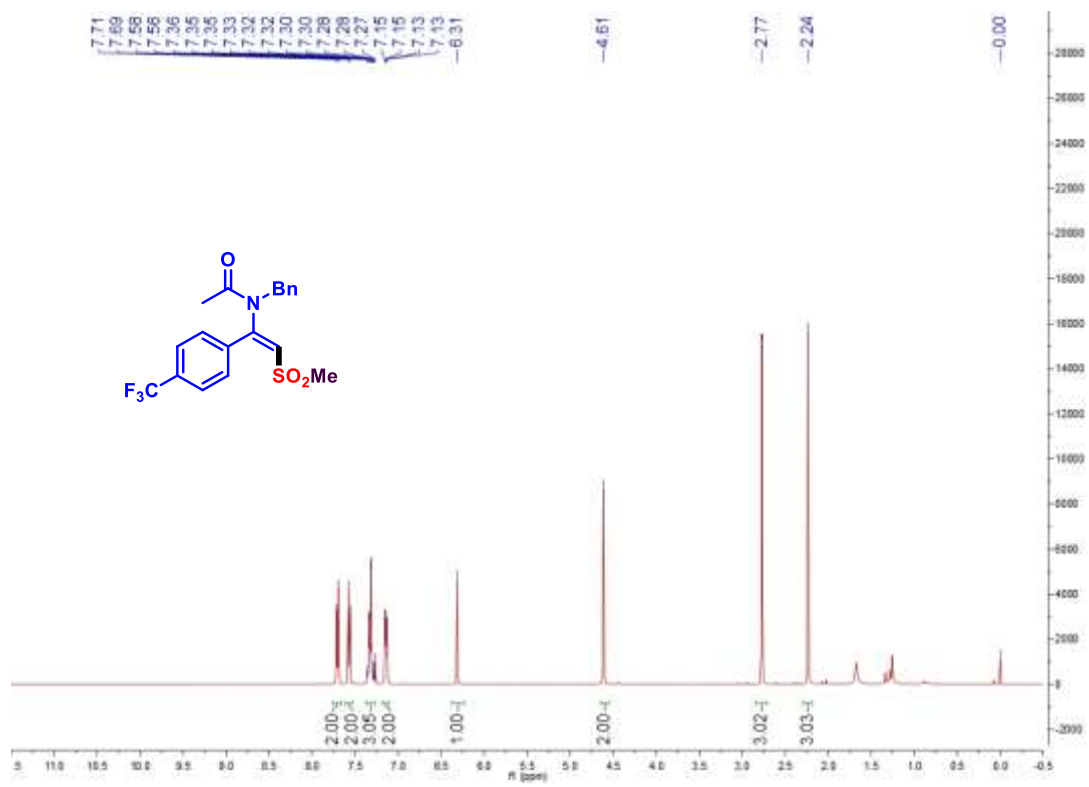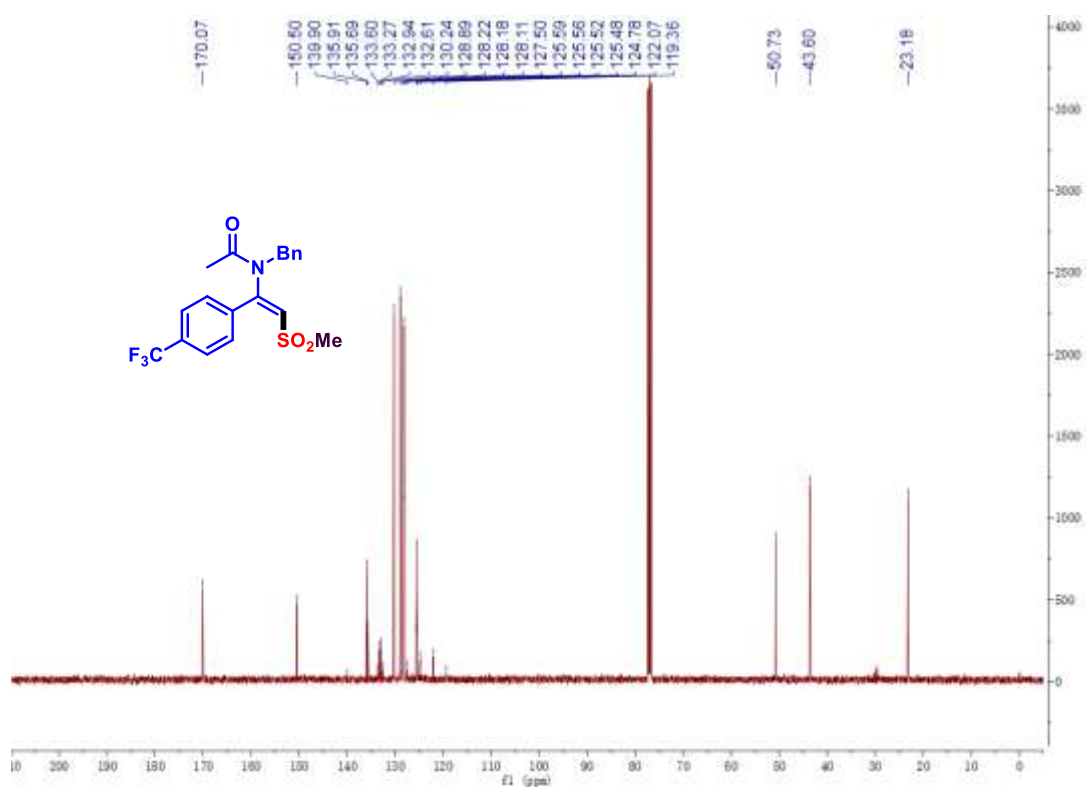

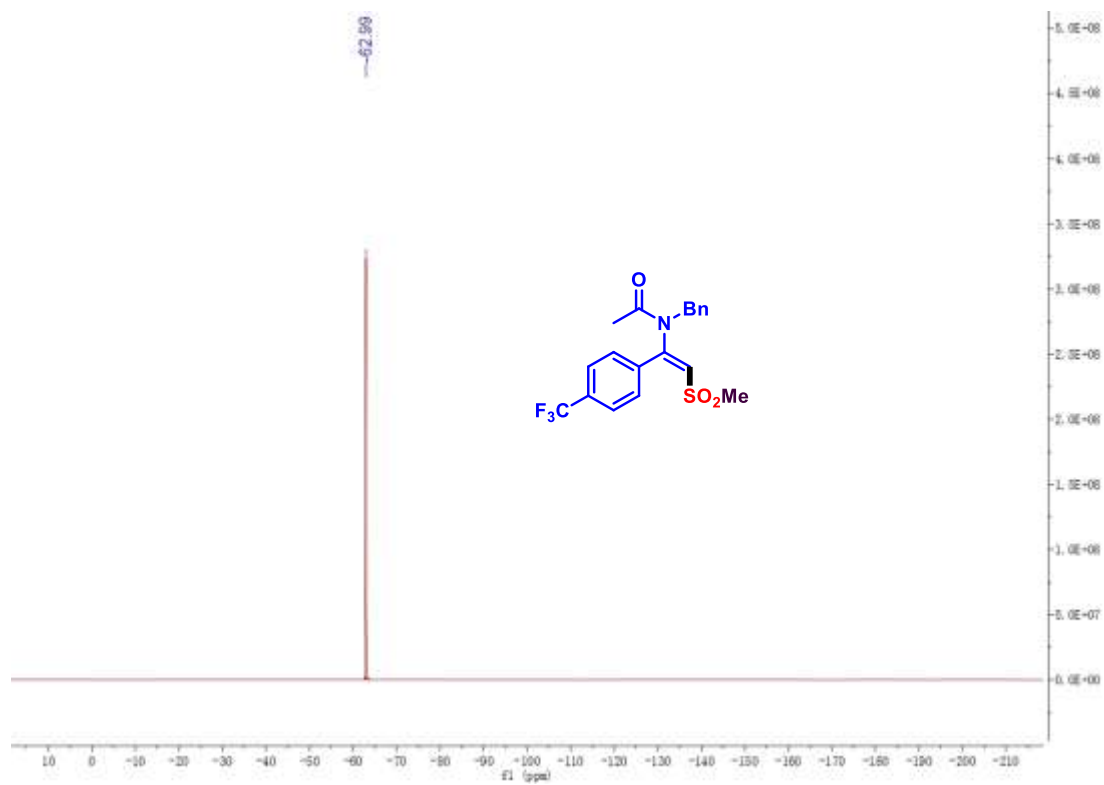

methyl (*E*)-4-(1-(*N*-benzylacetamido)-2-(methylsulfonyl)vinyl)benzoate (**3ga**)

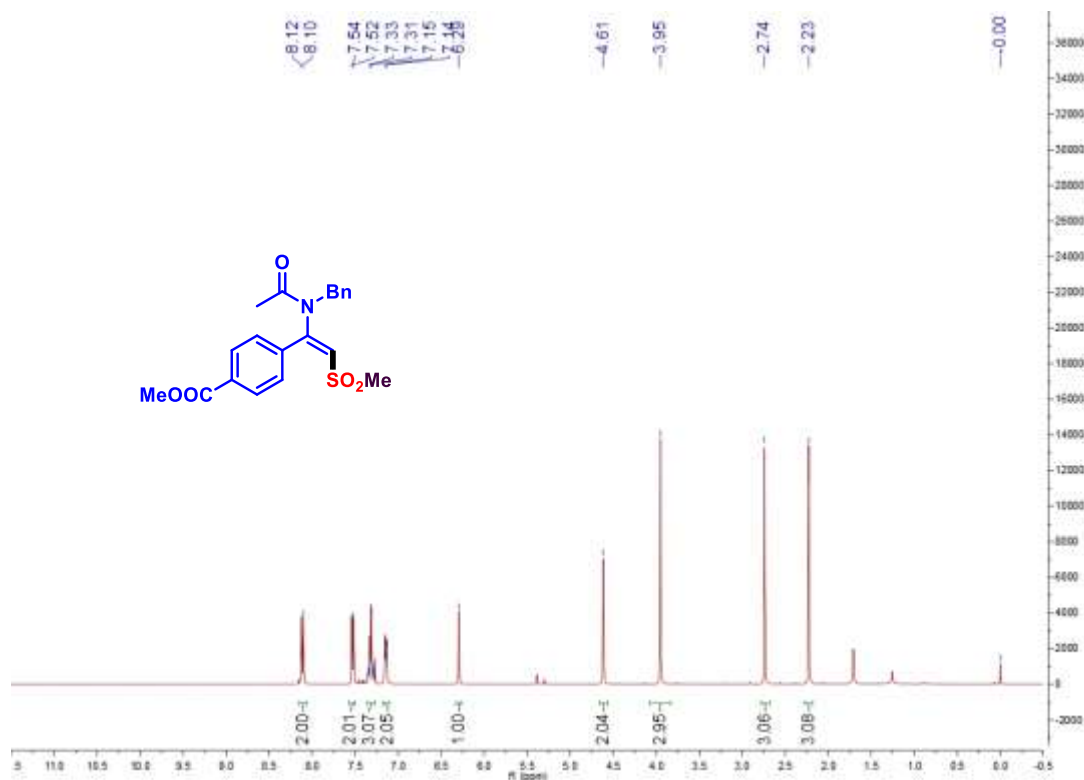



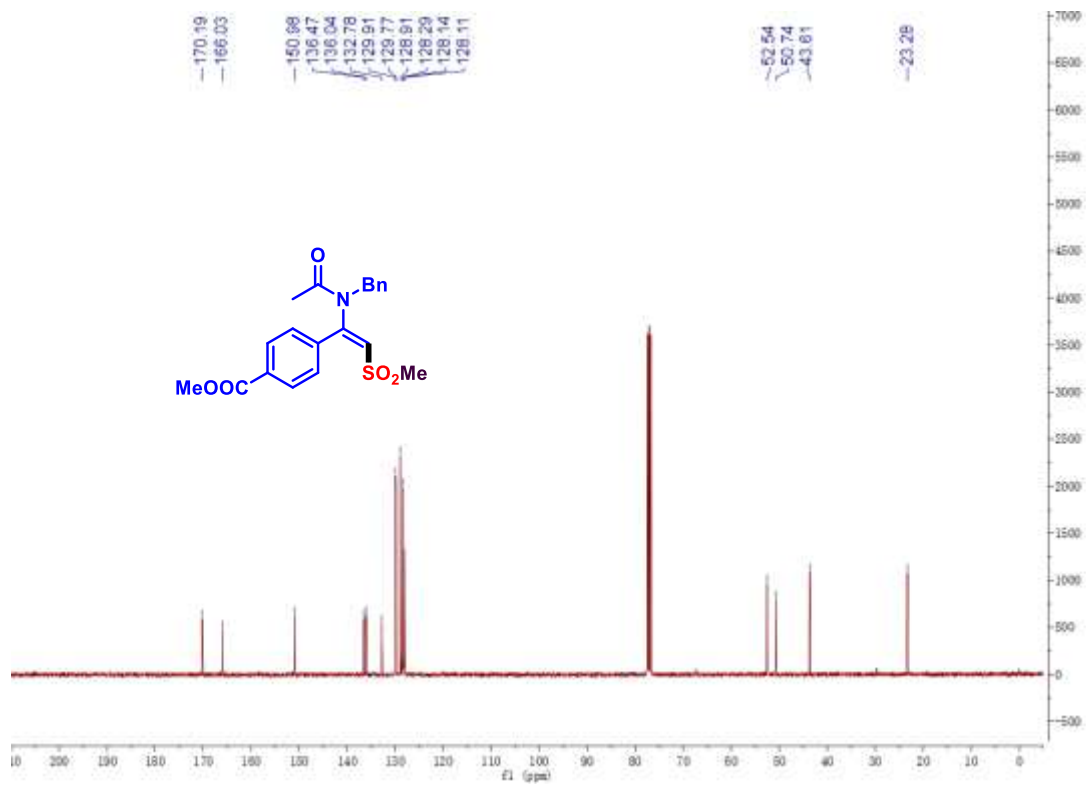

*(E)*-N-benzyl-N-(1-(4-fluorophenyl)-2-(methylsulfonyl)vinyl)acetamide (**3ha**)

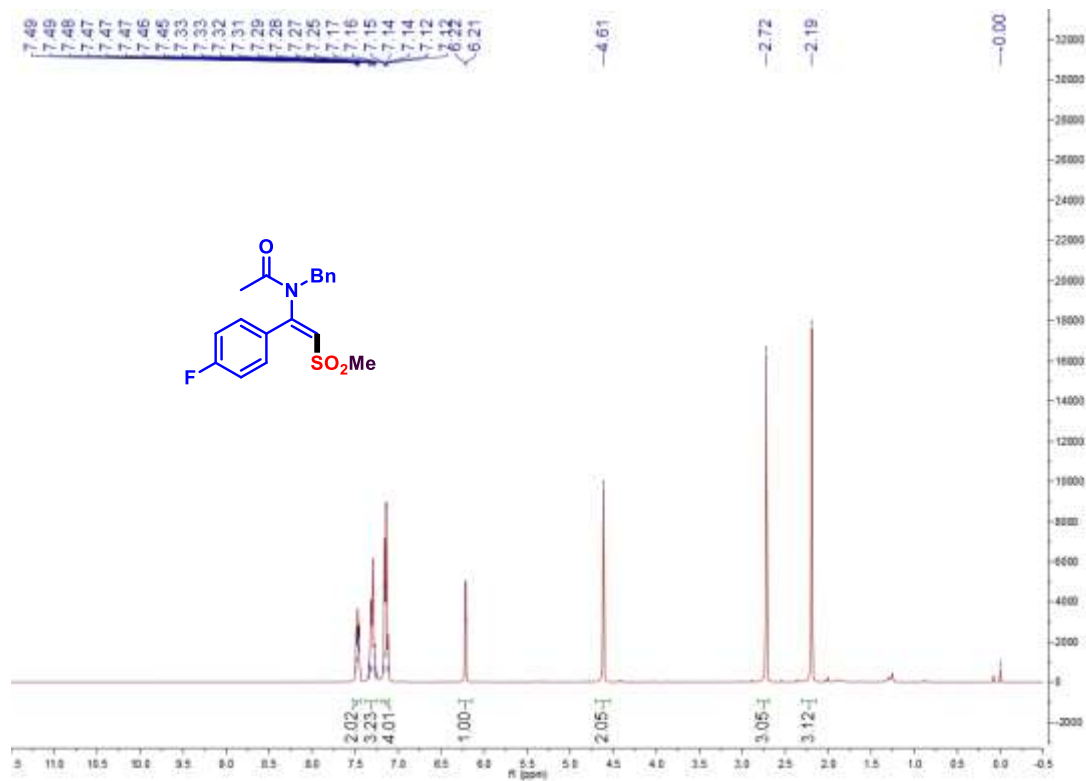

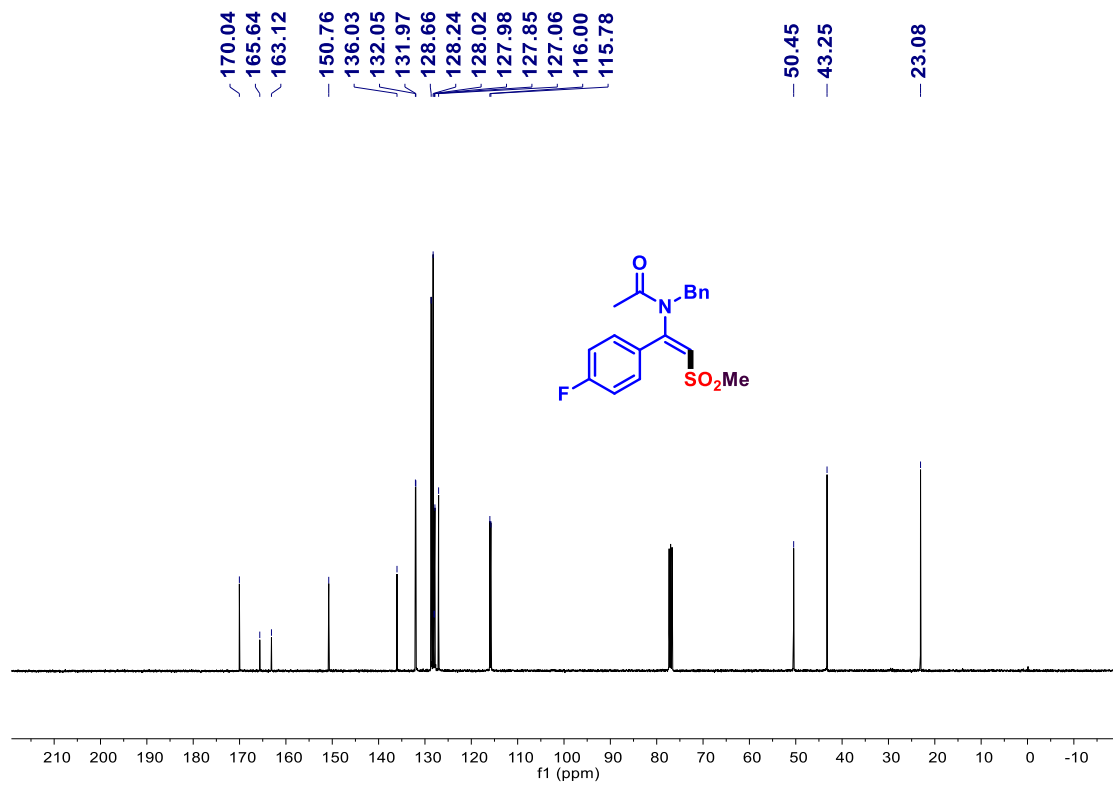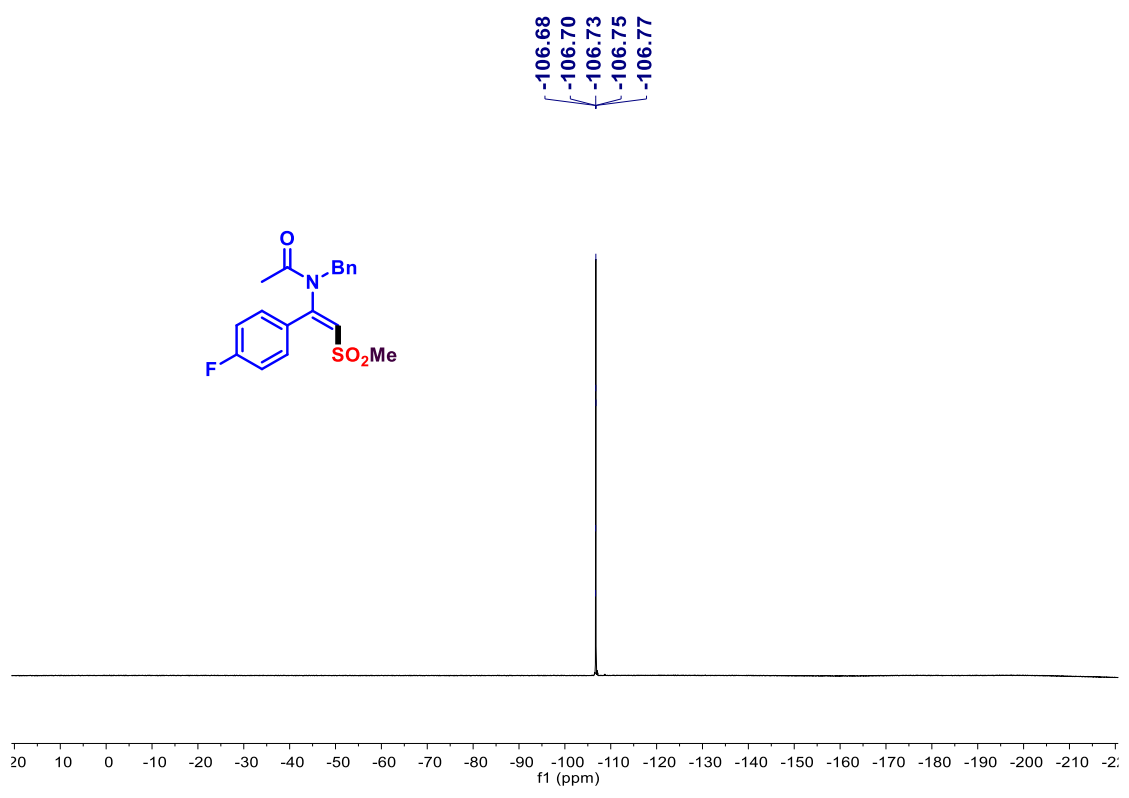

(E)-N-benzyl-N-(1-(3-chlorophenyl)-2-(methylsulfonyl)vinyl)acetamide (**3ia**)

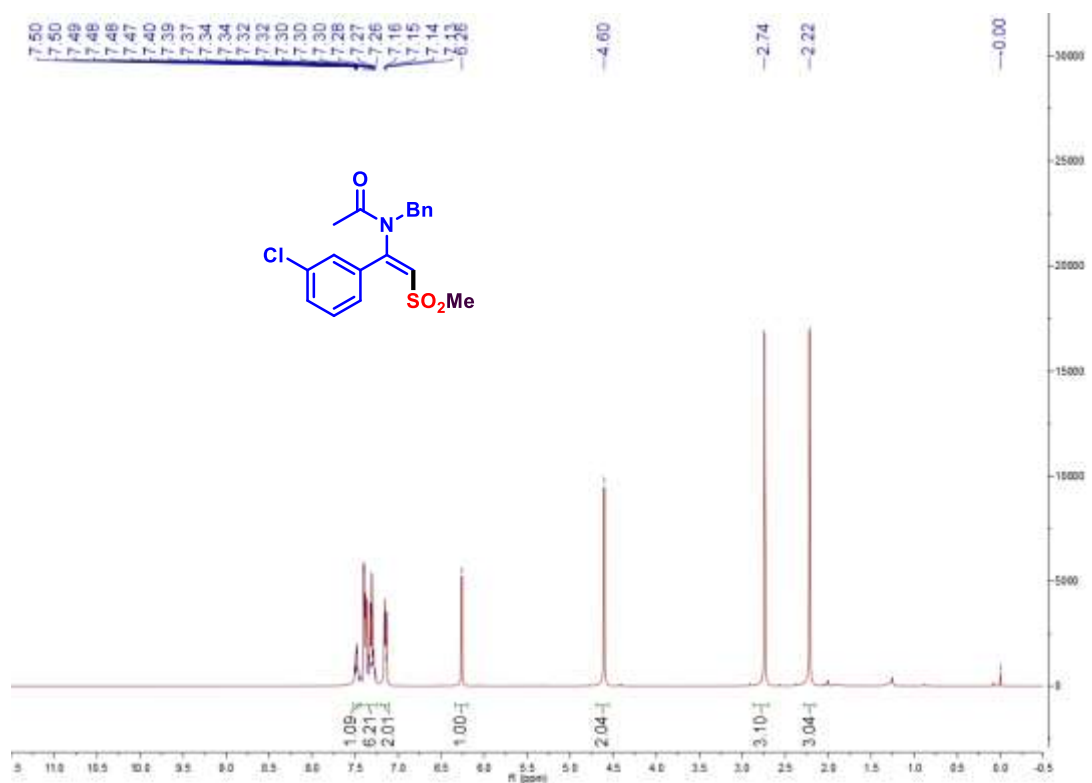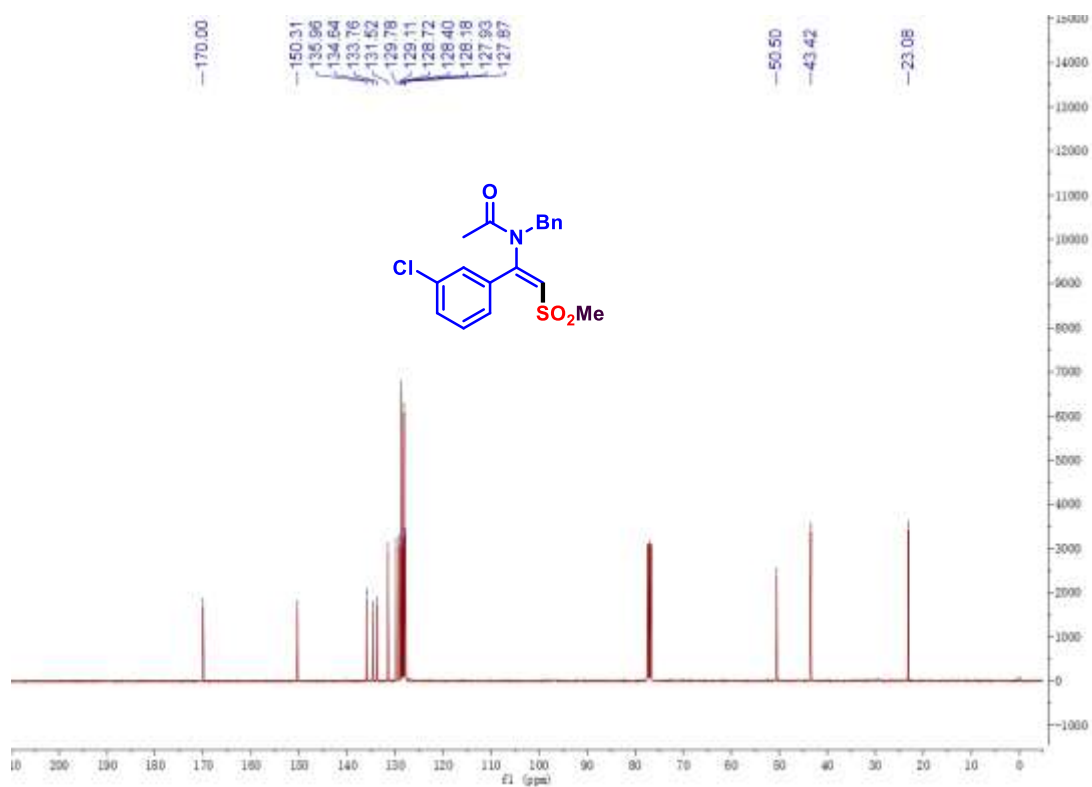

(*E*)-*N*-benzyl-*N*-(1-(2-bromophenyl)-2-(methylsulfonyl)vinyl)acetamide (**3ja**)

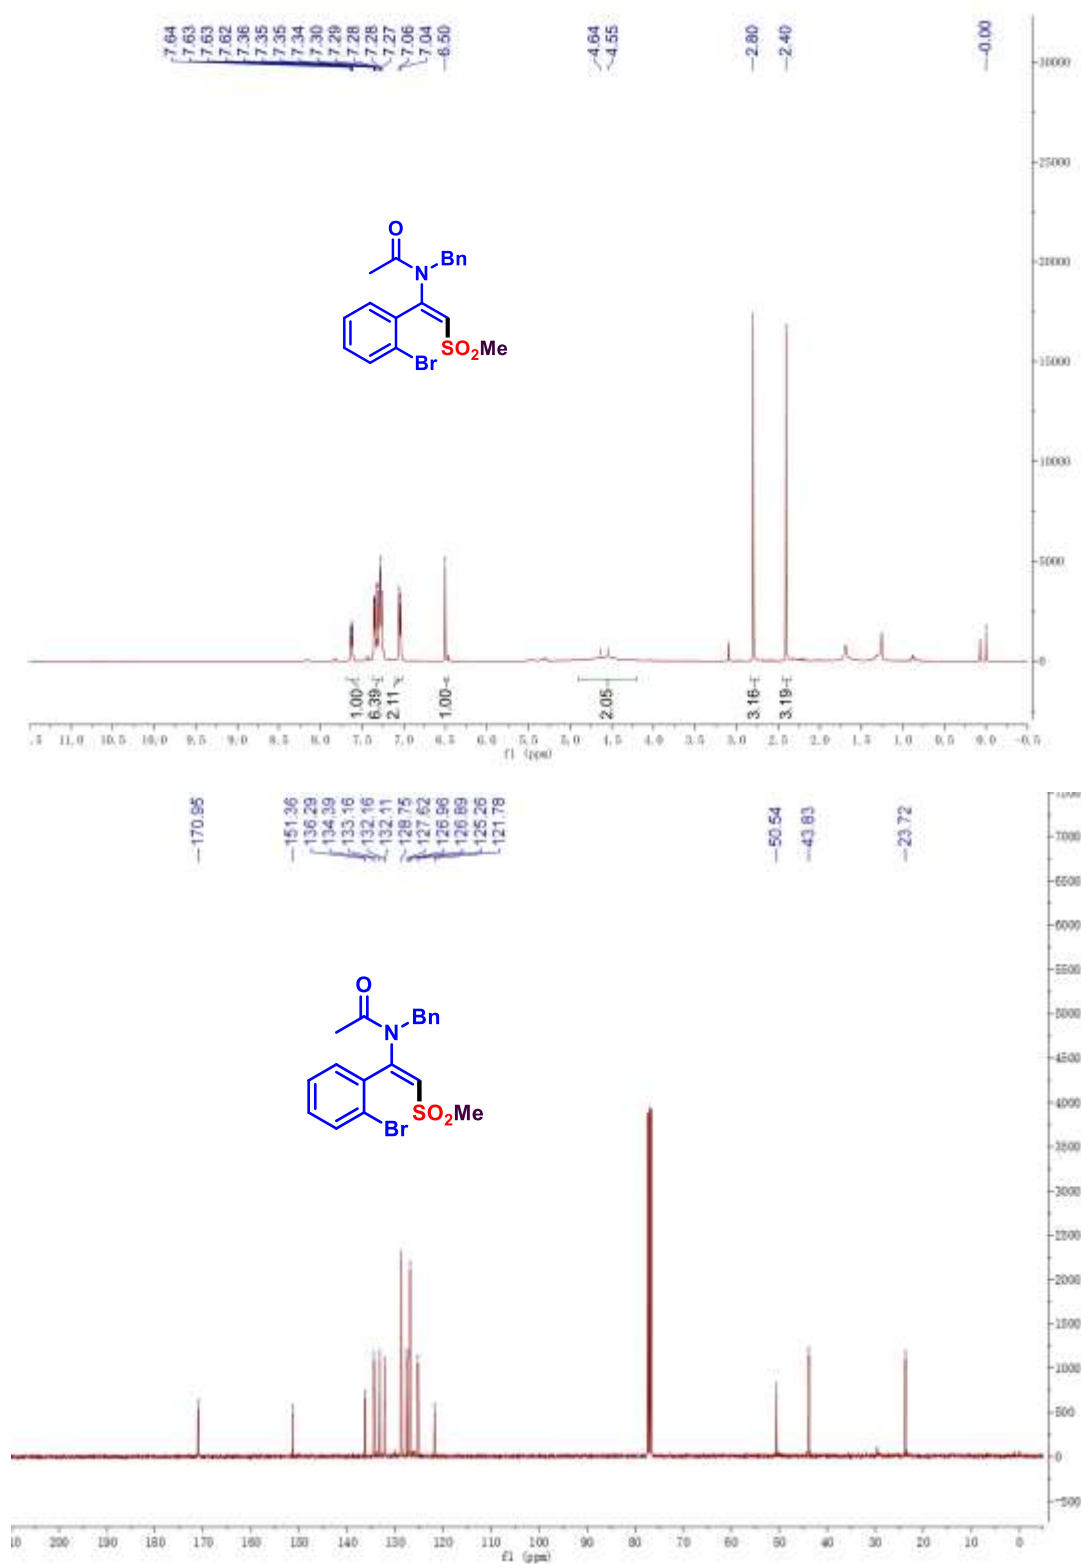

(*E*)-*N*-benzyl-*N*-(2-(methylsulfonyl)-1-(naphthalen-2-yl)vinyl)acetamide (**3ka**)

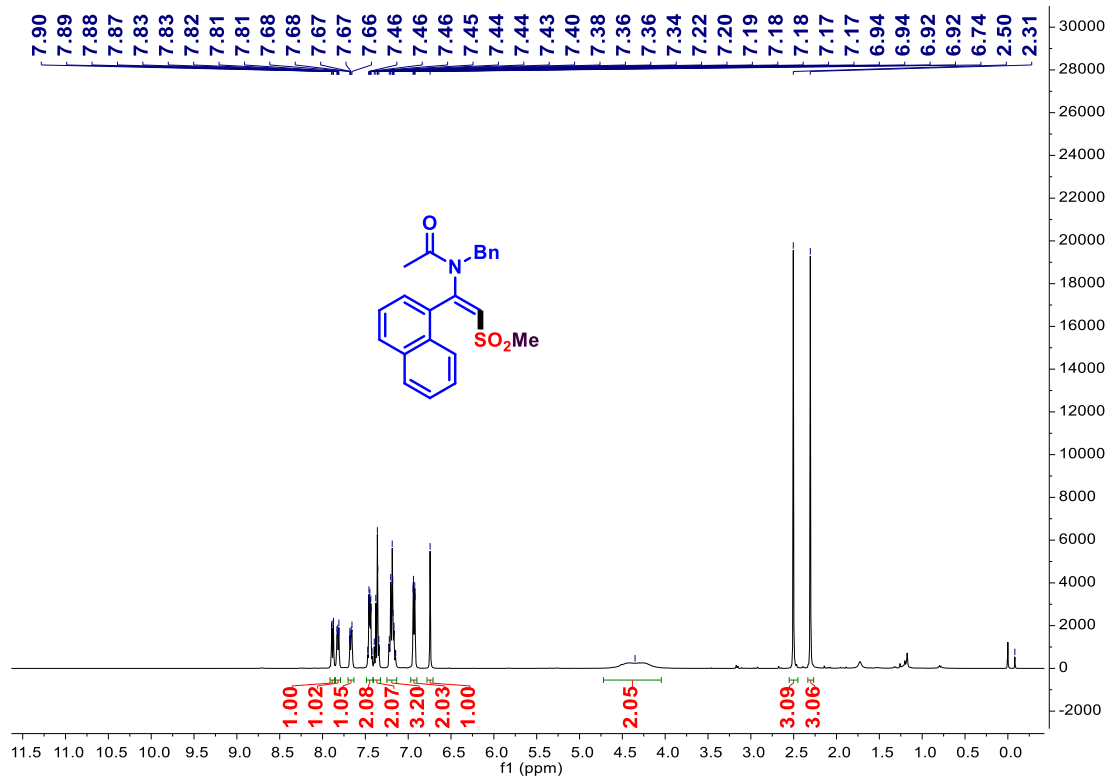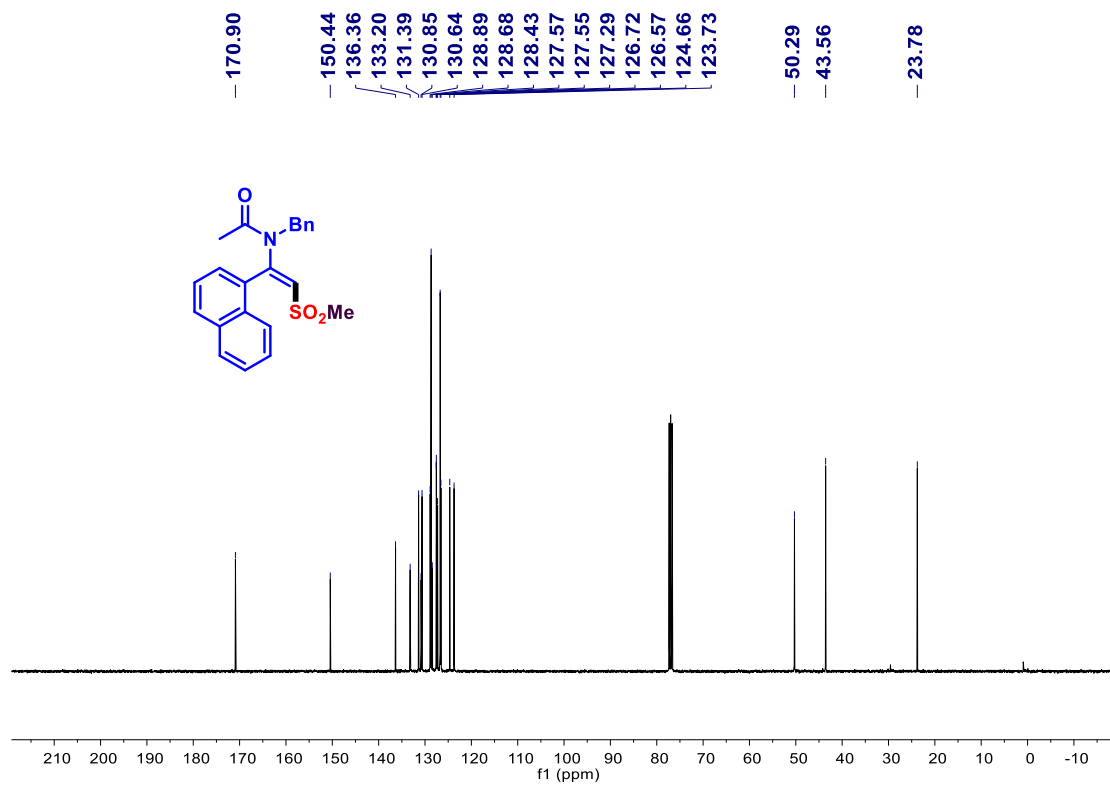

(*E*)-*N*-benzyl-*N*-(2-(methylsulfonyl)-1-(naphthalen-2-yl)vinyl)acetamide (**3la**)

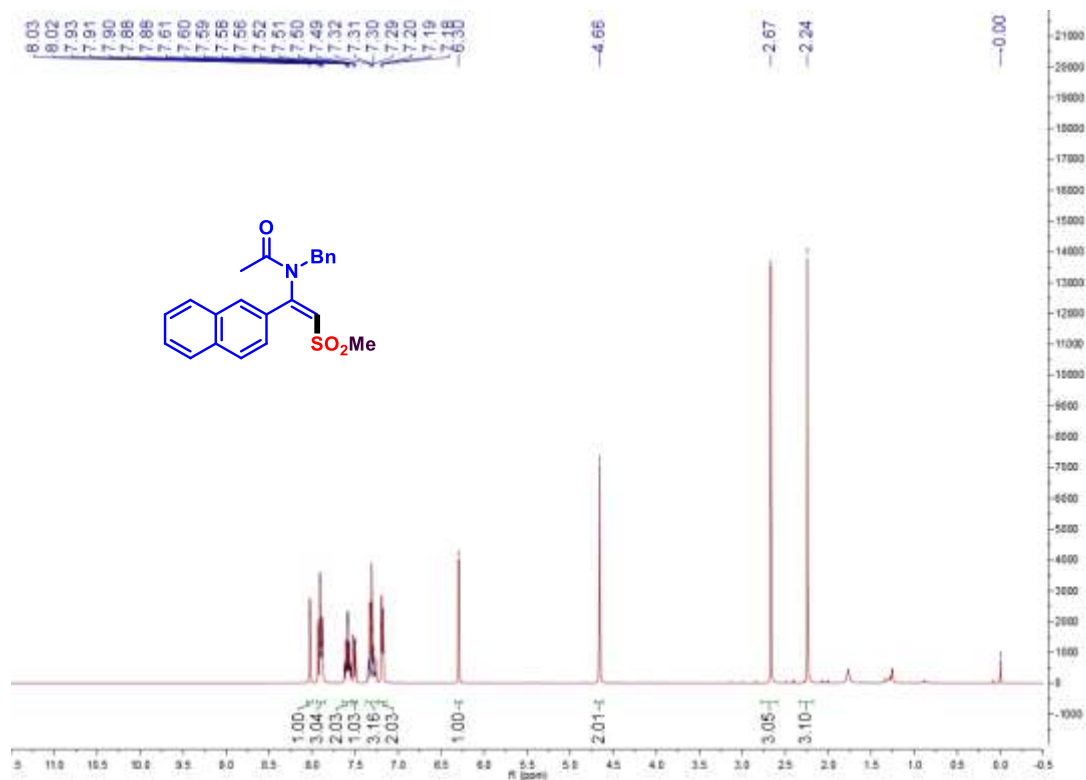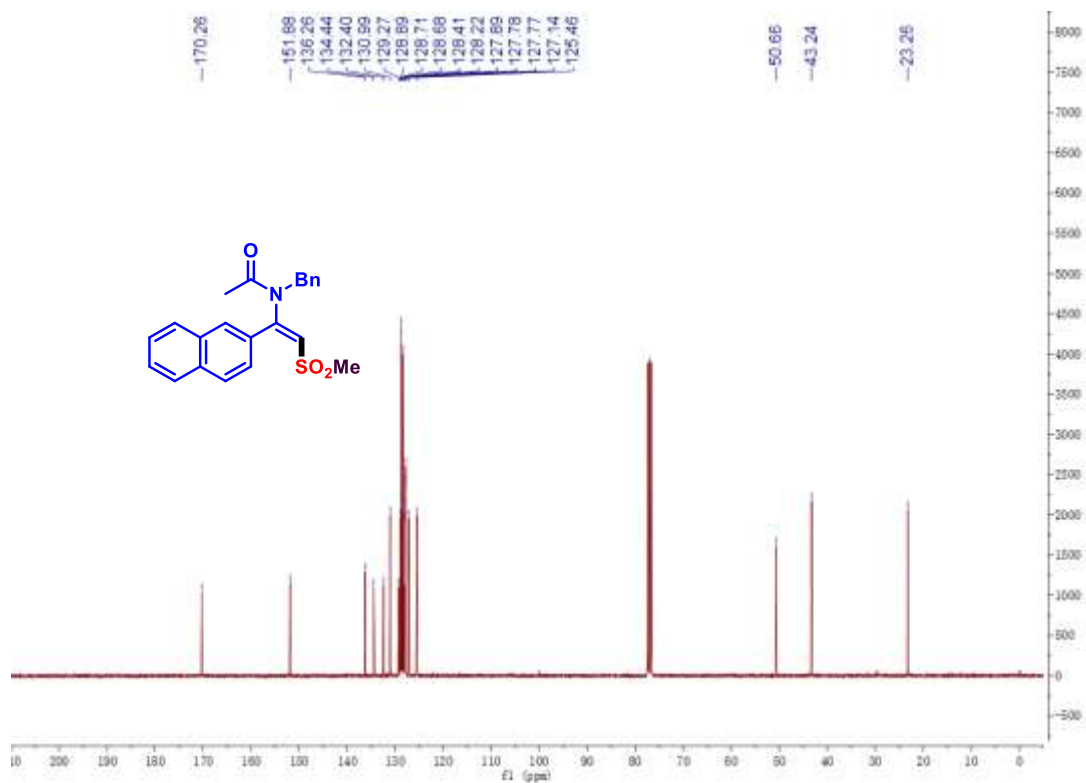

*(E)*-*N*-benzyl-*N*-(2-(methylsulfonyl)-1-(pyridin-2-yl)vinyl)acetamide (**3ma**)

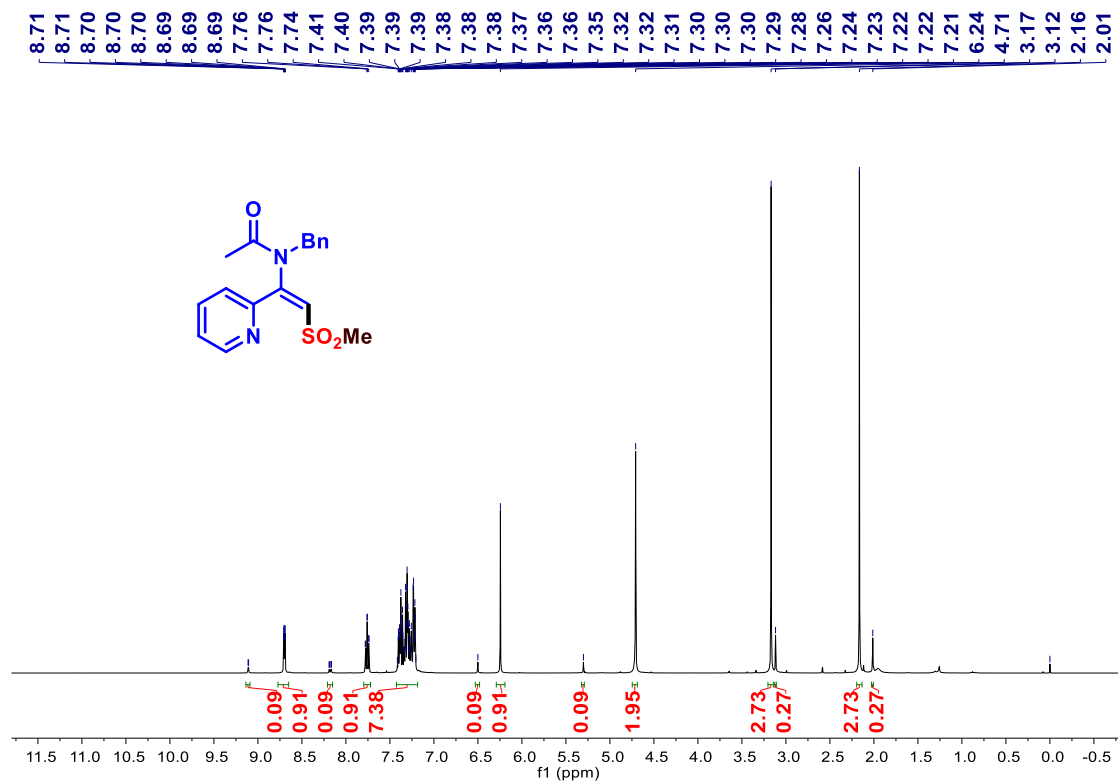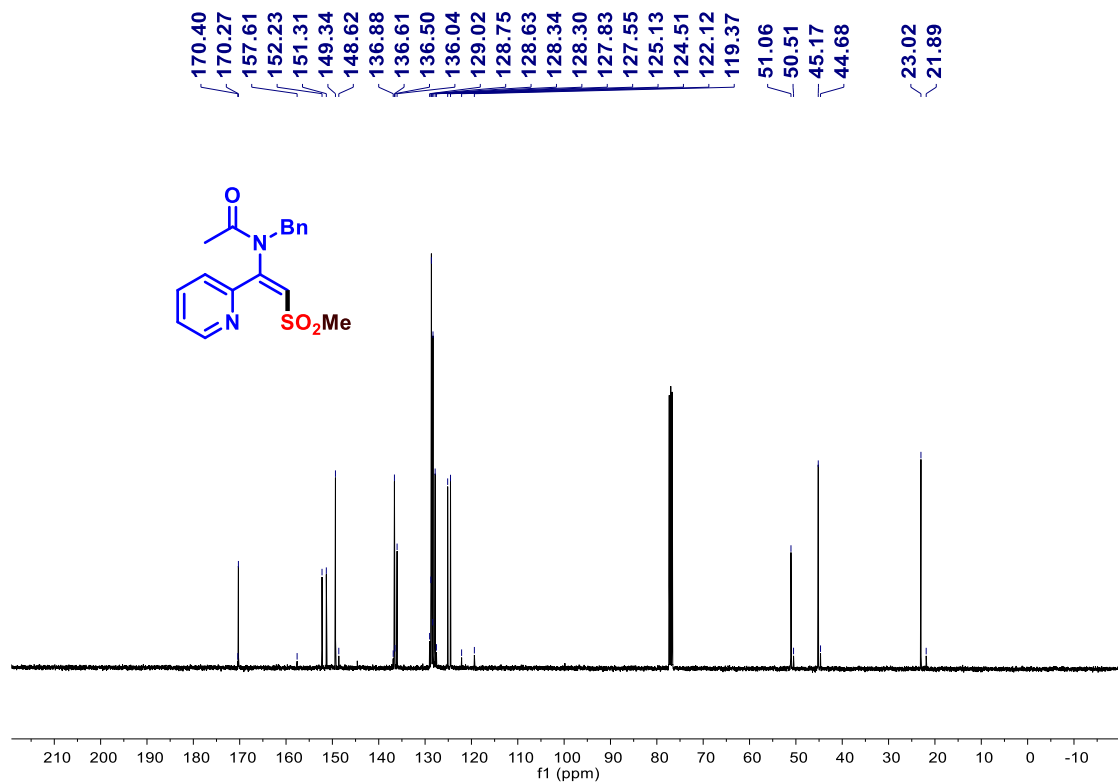

(*E*)-*N*-benzyl-*N*-(2-(methylsulfonyl)-1-(thiophen-2-yl)vinyl)acetamide (**3na**)

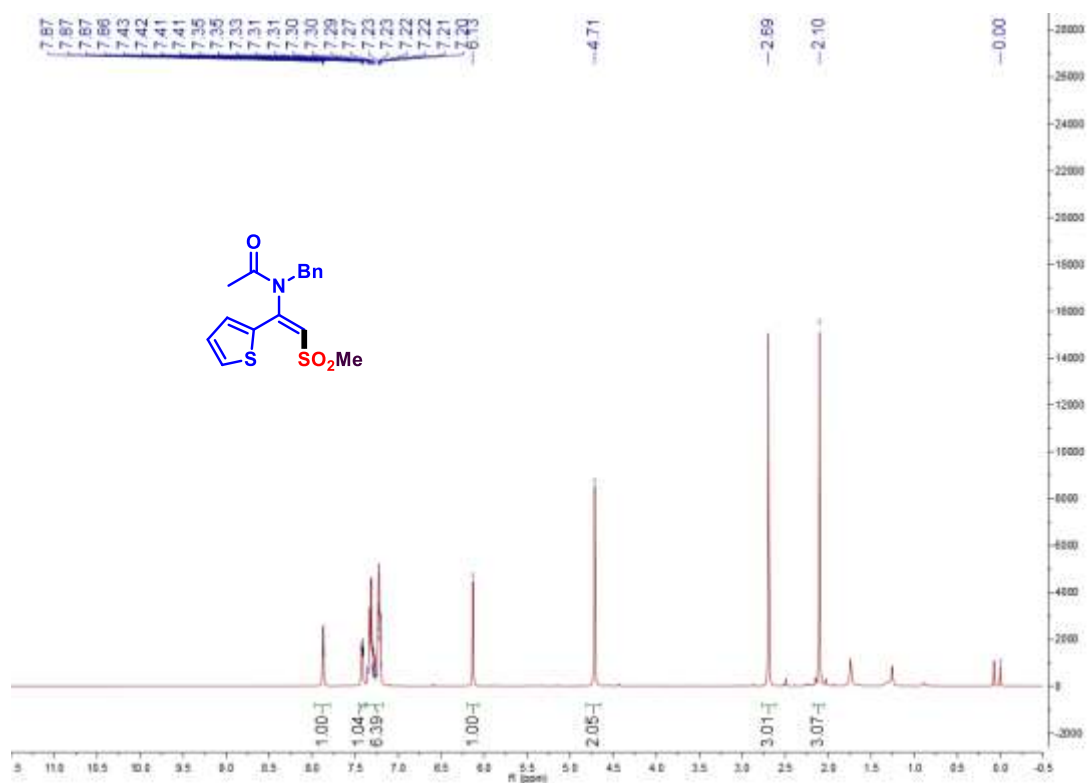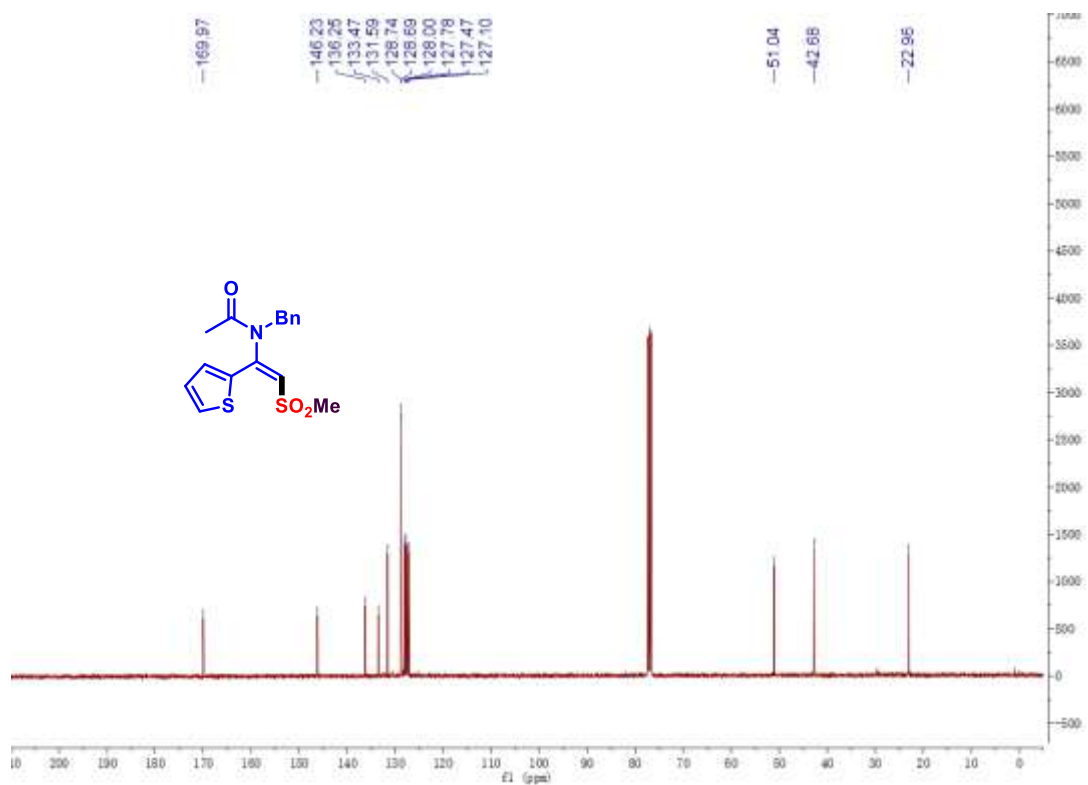



(*E*)-*N*-methyl-*N*-(2-(methylsulfonyl)-1-phenylvinyl)acetamide (**30a**)

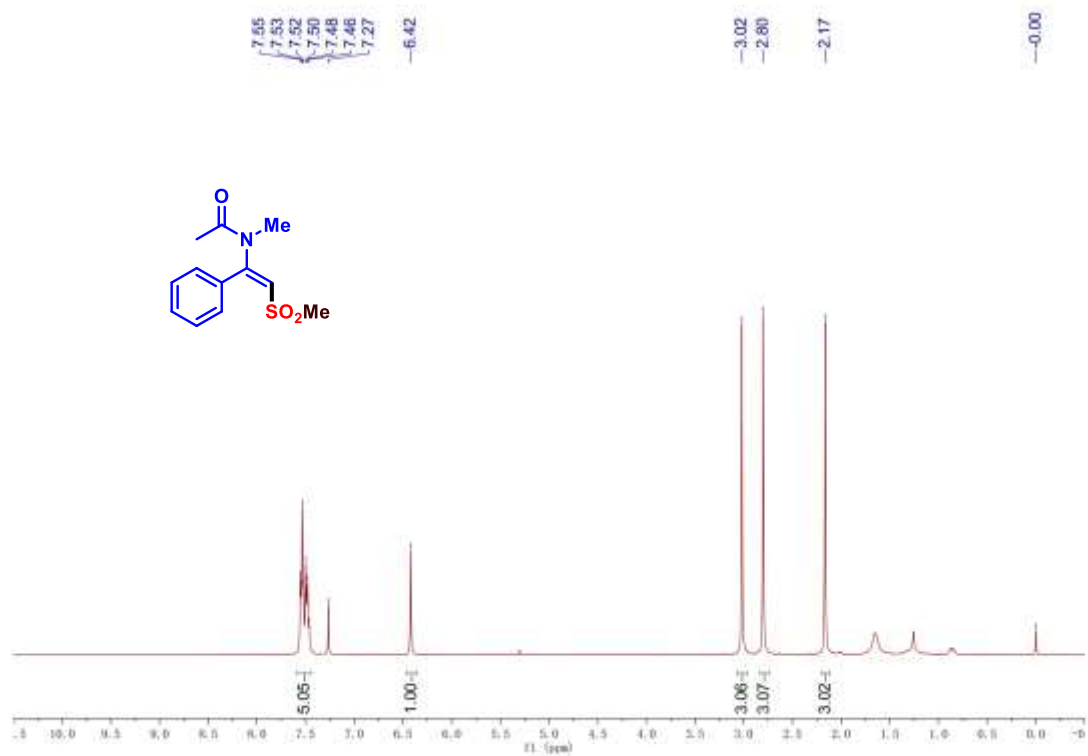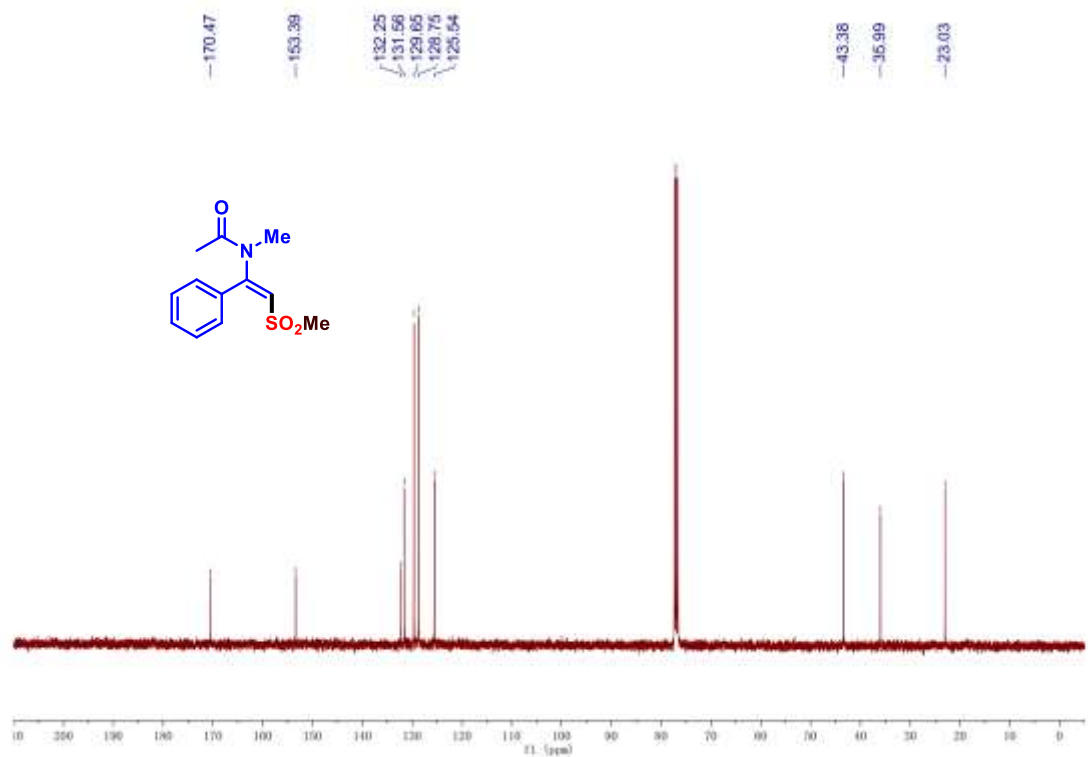

(*E*)-*N*-isopropyl-*N*-(2-(methylsulfonyl)-1-phenylvinyl)acetamide (**3pa**)

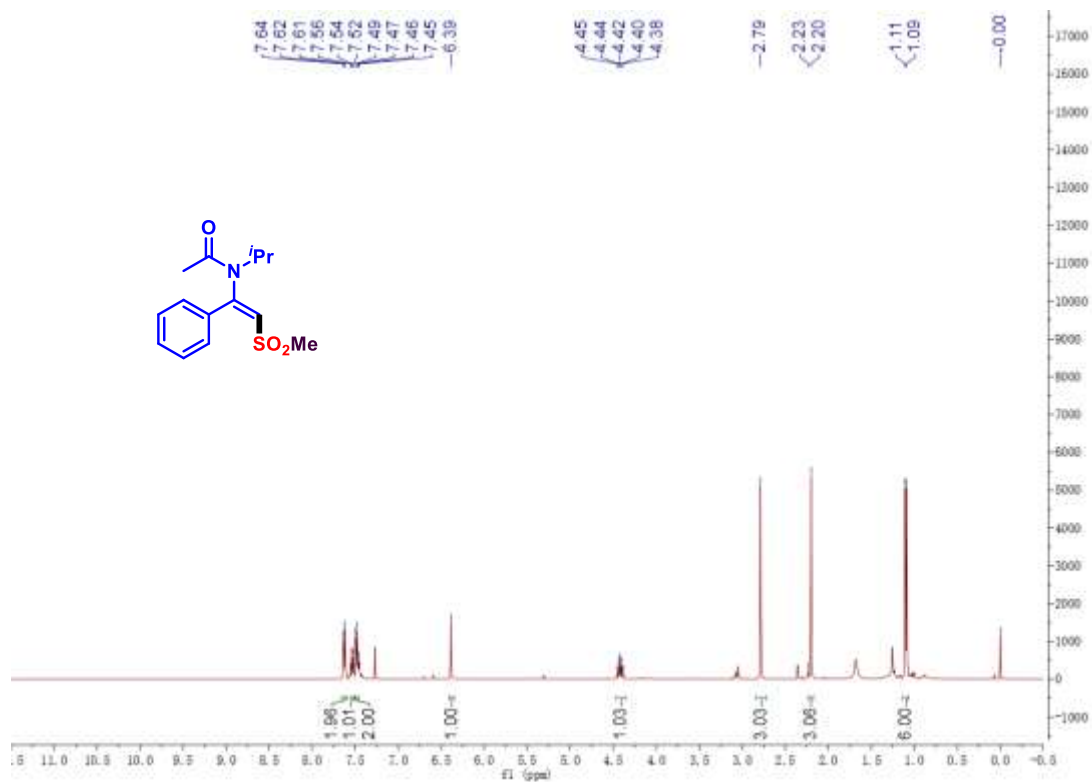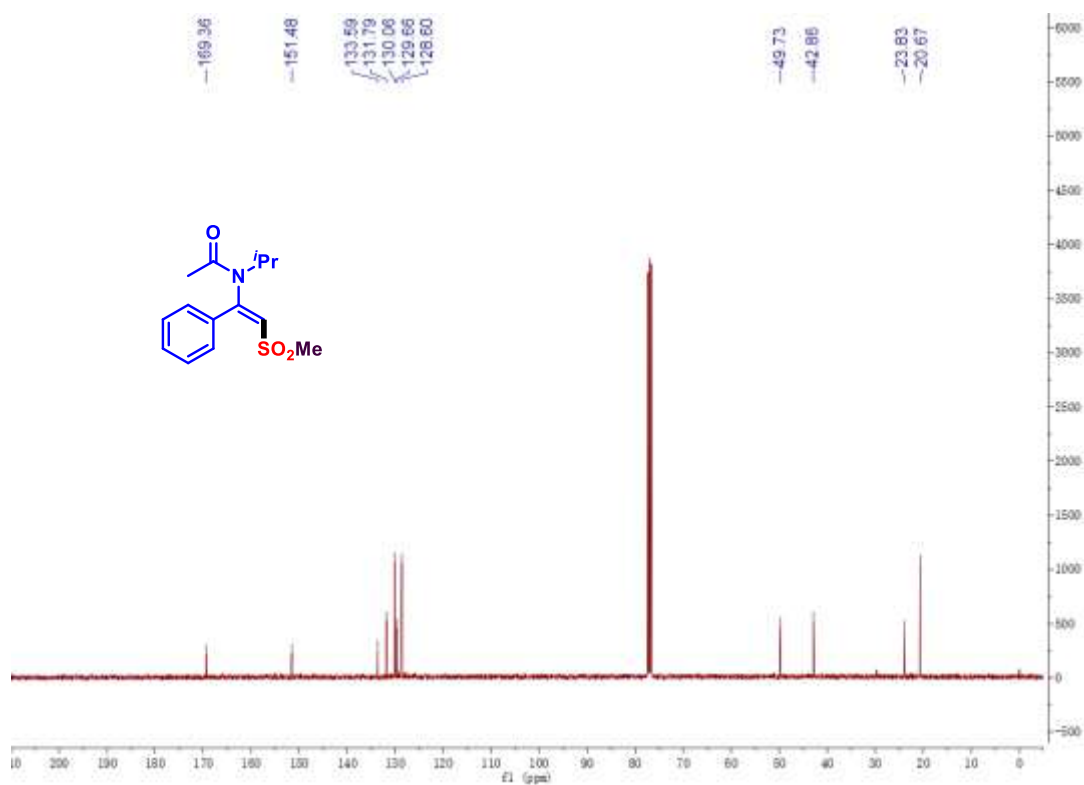

(*E*)-*N*-butyl-*N*-(2-(methylsulfonyl)-1-phenylvinyl)acetamide (**3qa**)

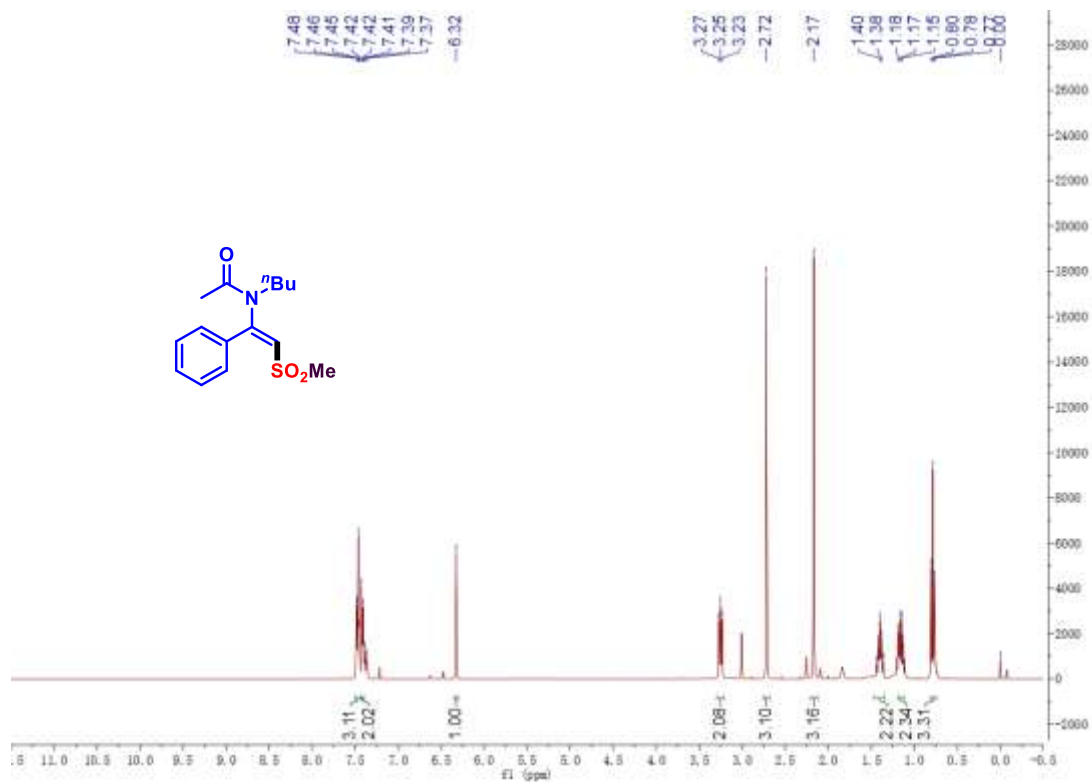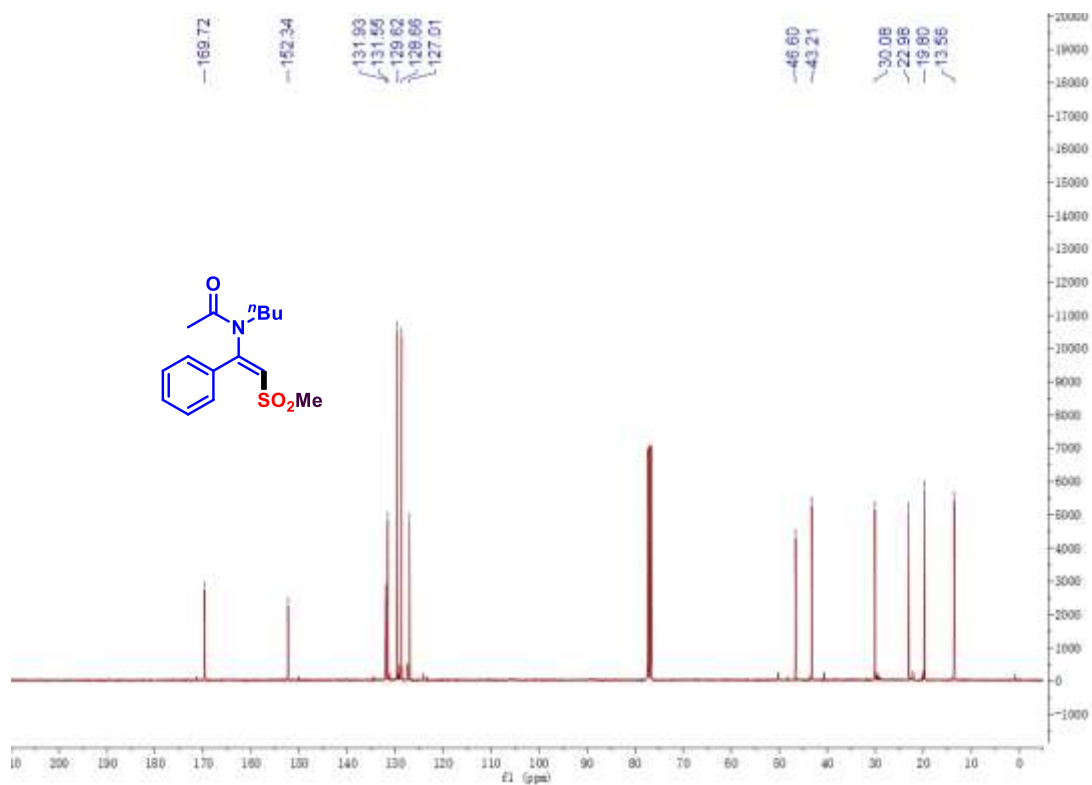

(*E*)-*N*-benzyl-*N*-(2-(ethylsulfonyl)-1-phenylvinyl)acetamide (**3ab**)

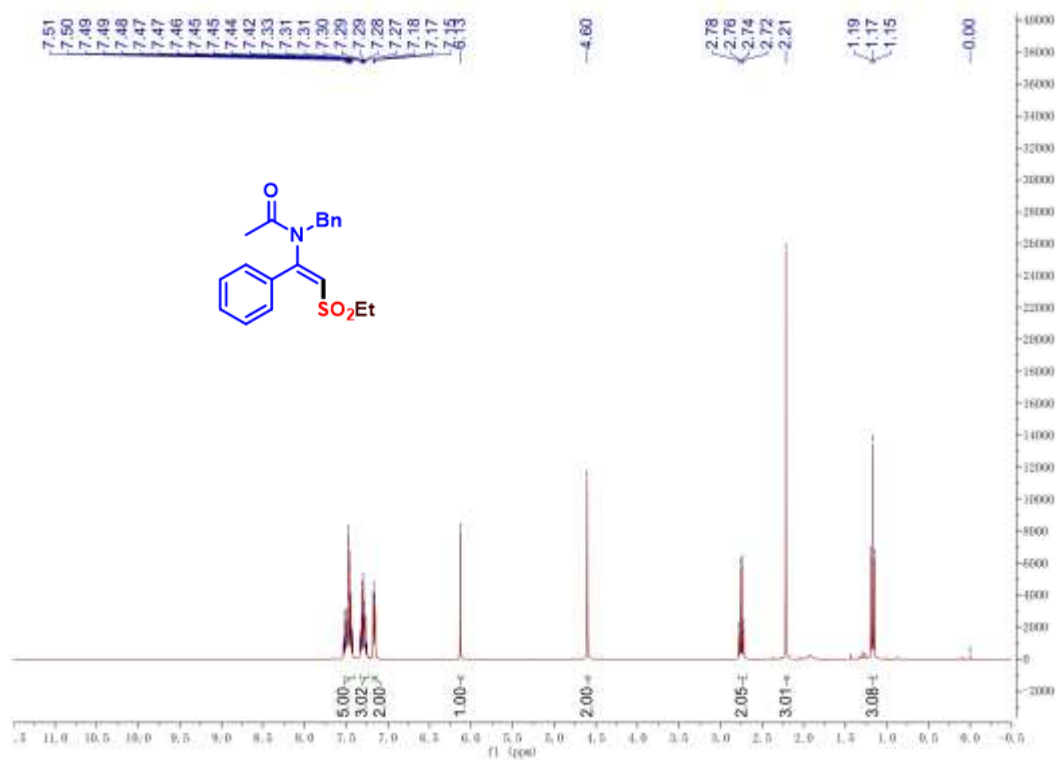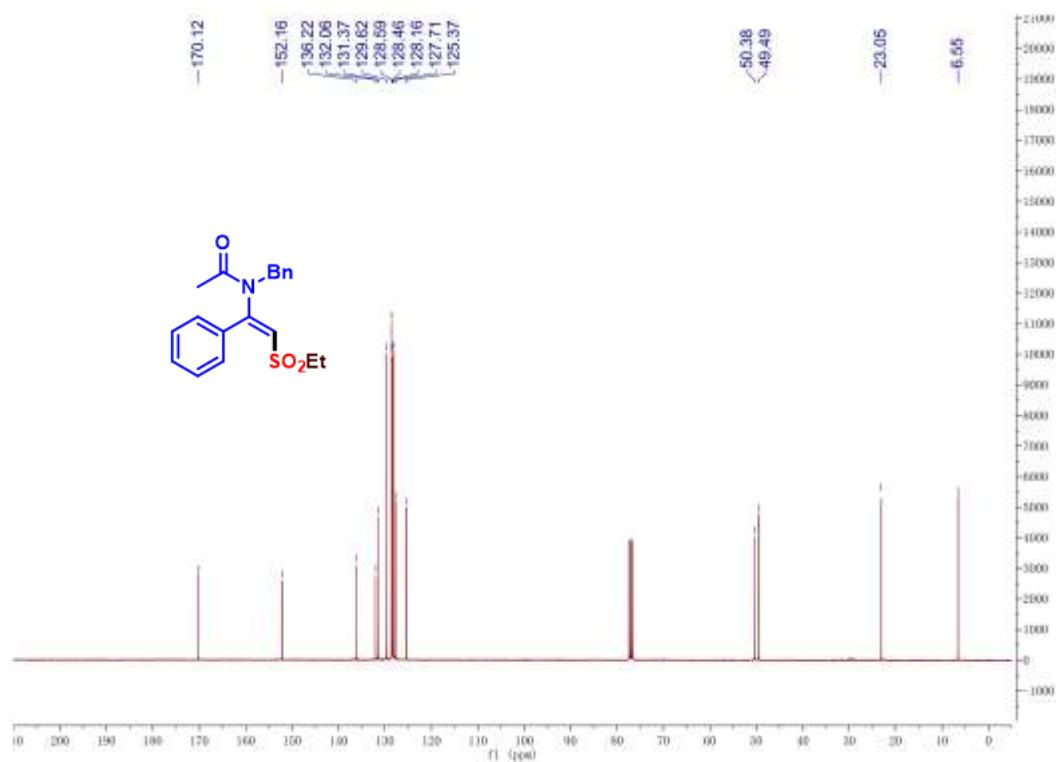

(E)-N-benzyl-N-(2-(pentylsulfonyl)-1-phenylvinyl)acetamide (**3ac**)

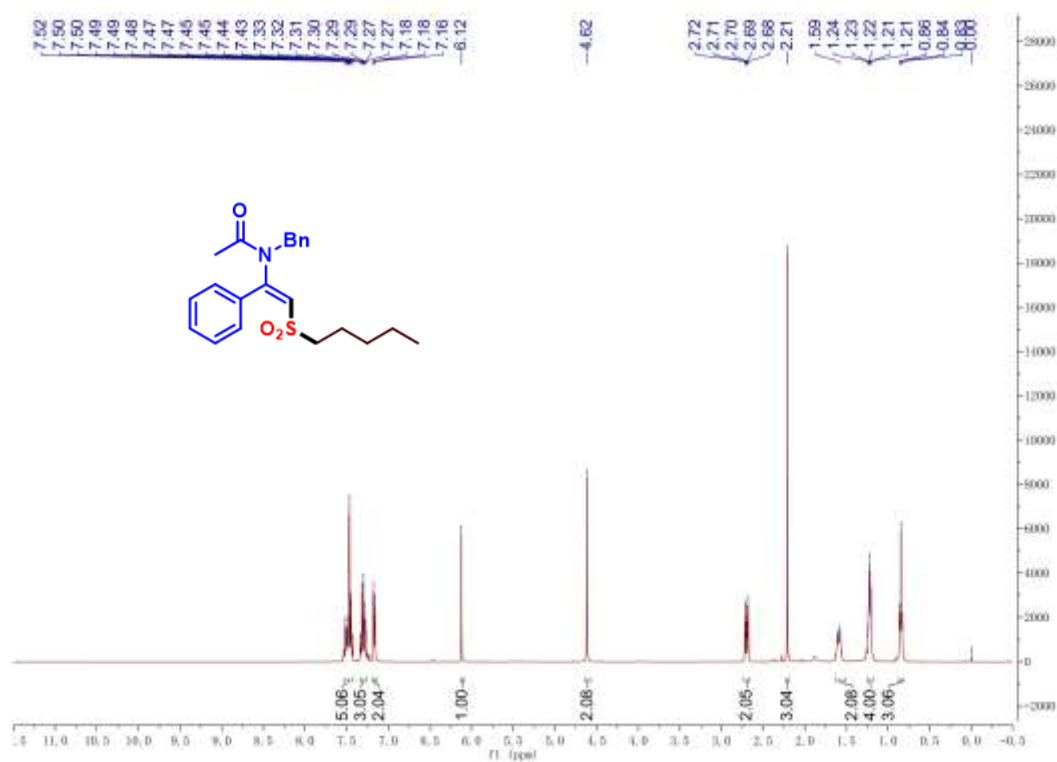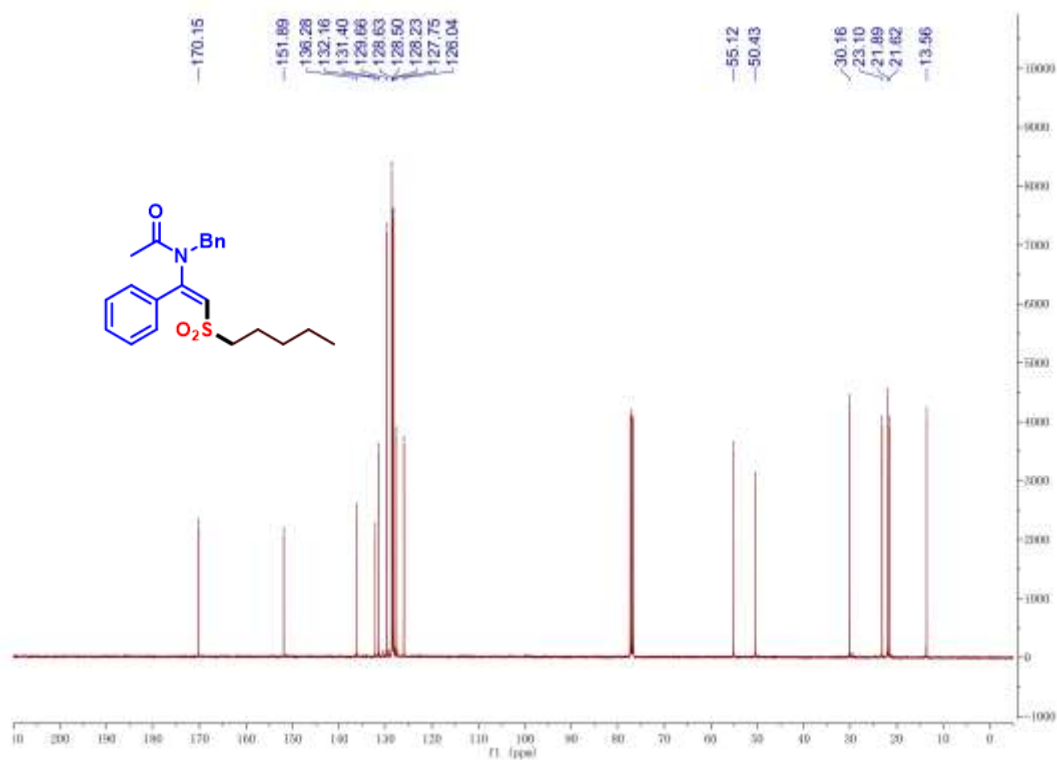

(E)-N-benzyl-N-(2-(phenethylsulfonyl)-1-phenylvinyl)acetamide (**3ad**)

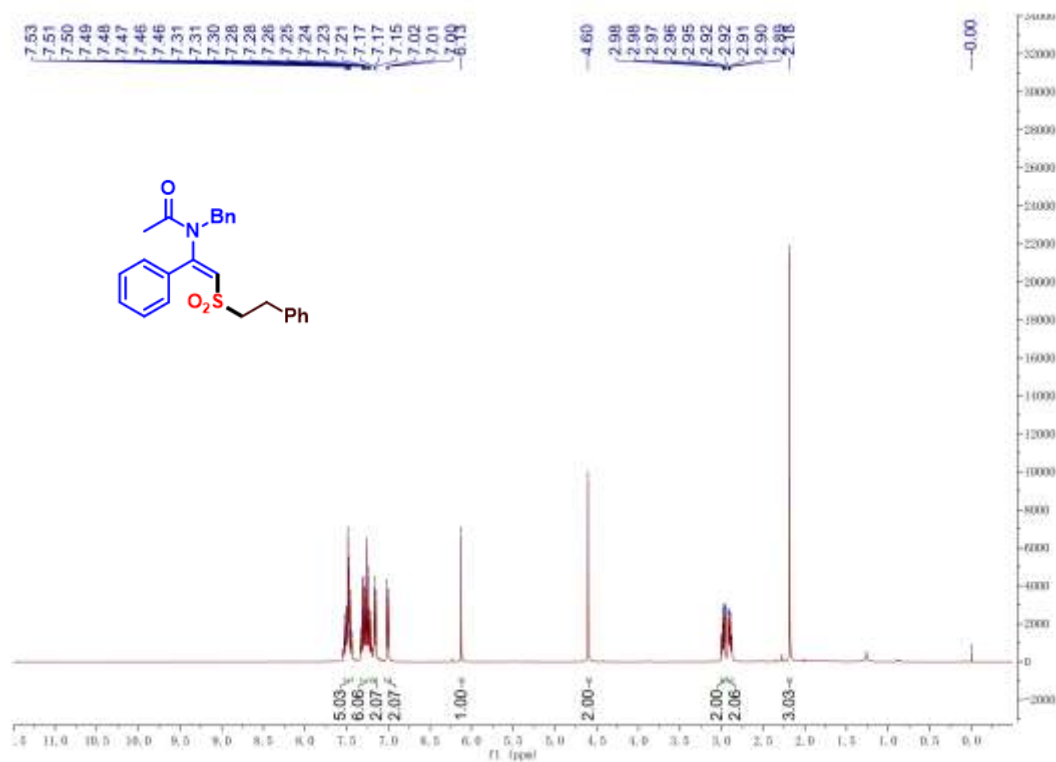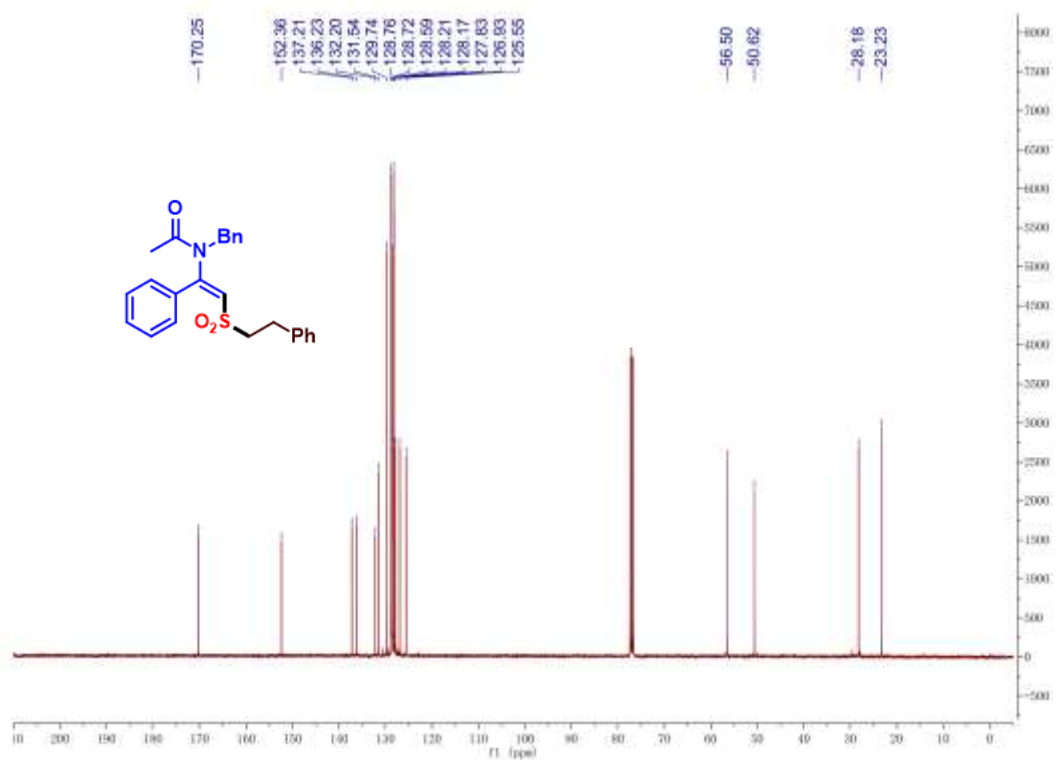

(E)-N-benzyl-N-(1-phenyl-2-((3-phenylpropyl)sulfonyl)vinyl)acetamide (**3ae**)

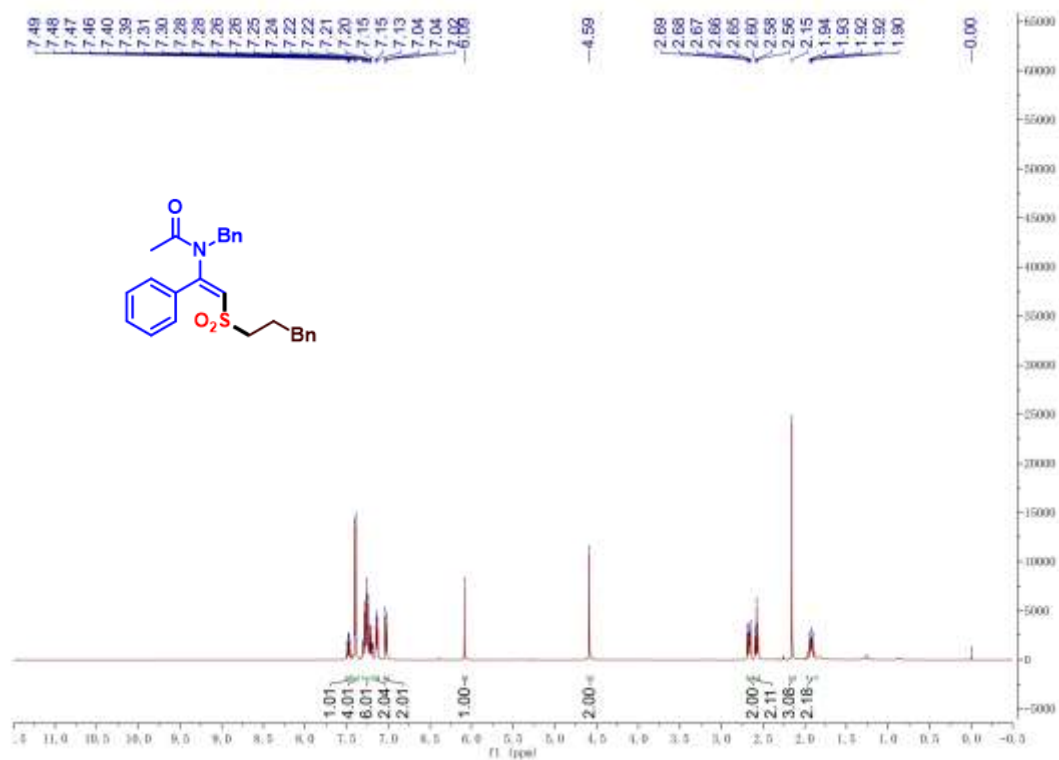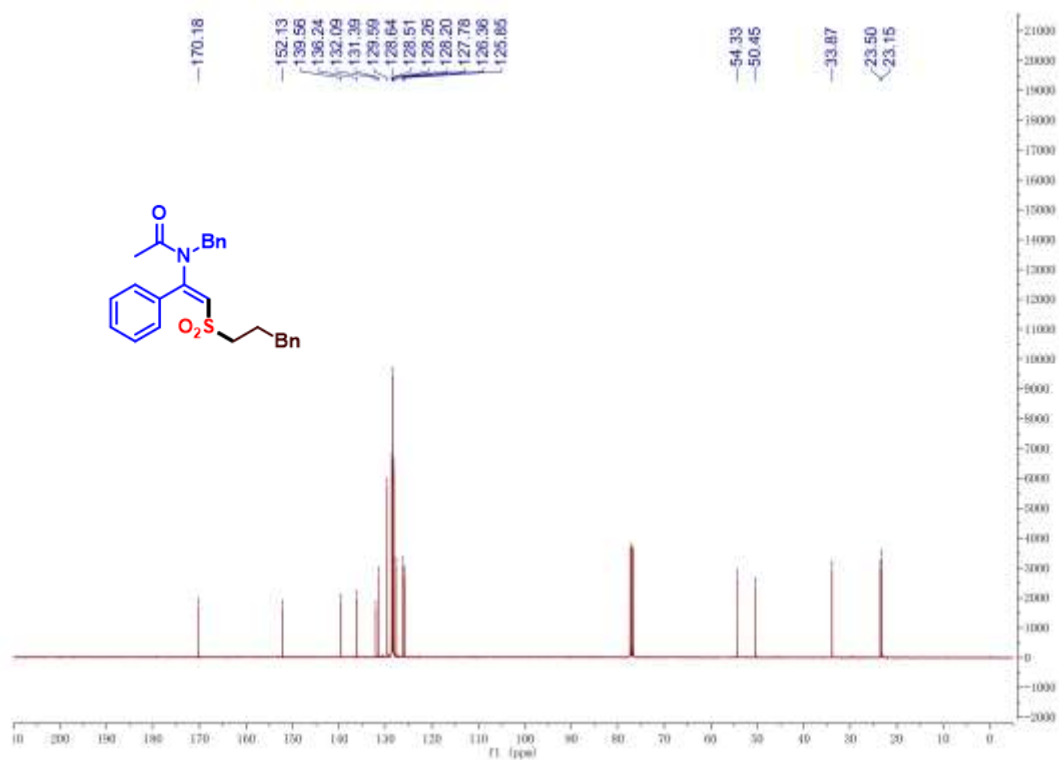

(*E*)-*N*-benzyl-*N*-(2-(but-3-yn-1-ylsulfonyl)-1-phenylvinyl)acetamide (**3af**)

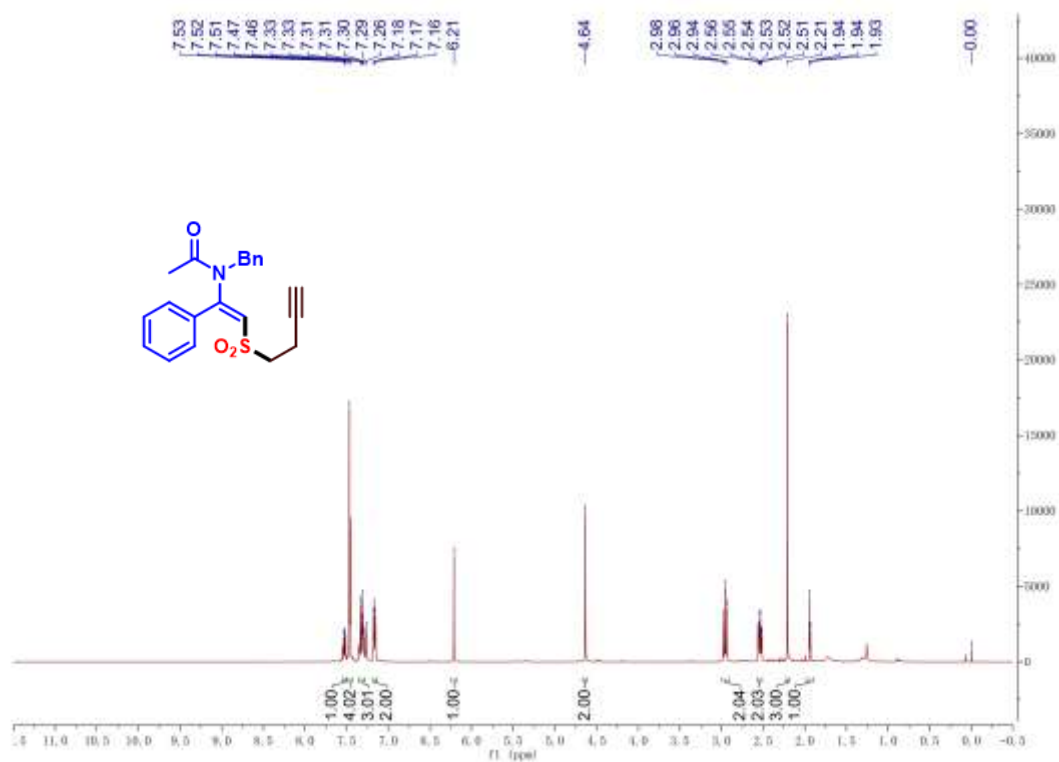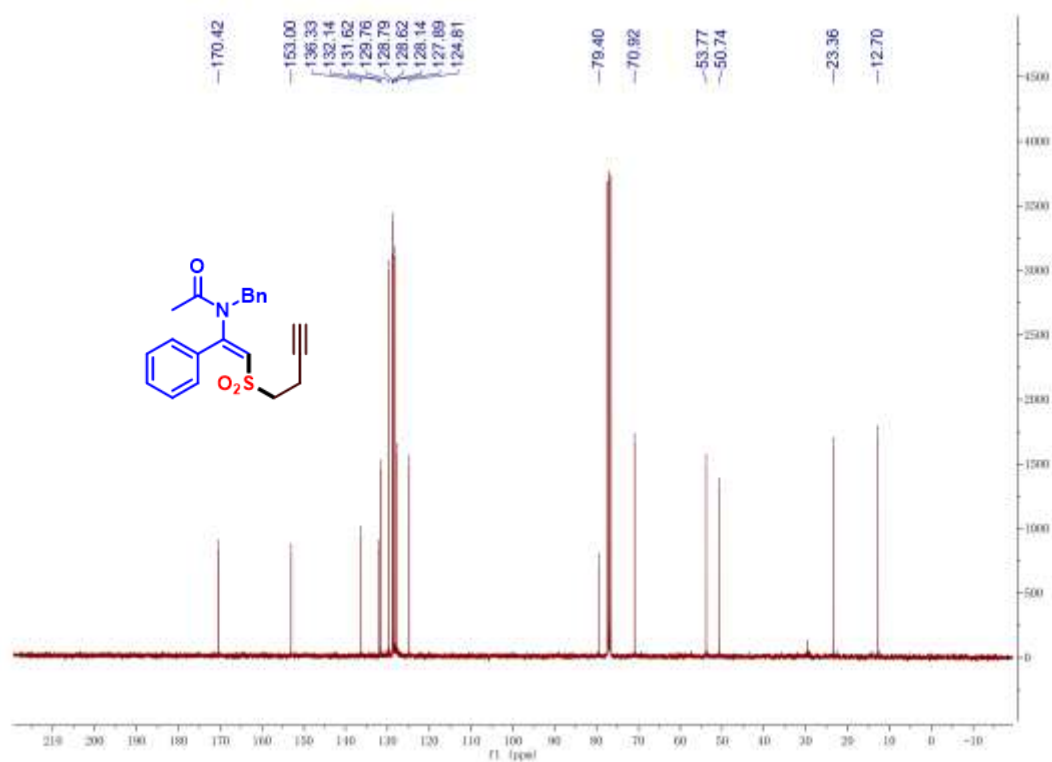



(*E*)-*N*-benzyl-*N*-(2-(cyclobutylsulfonyl)-1-phenylvinyl)acetamide (**3ag**)

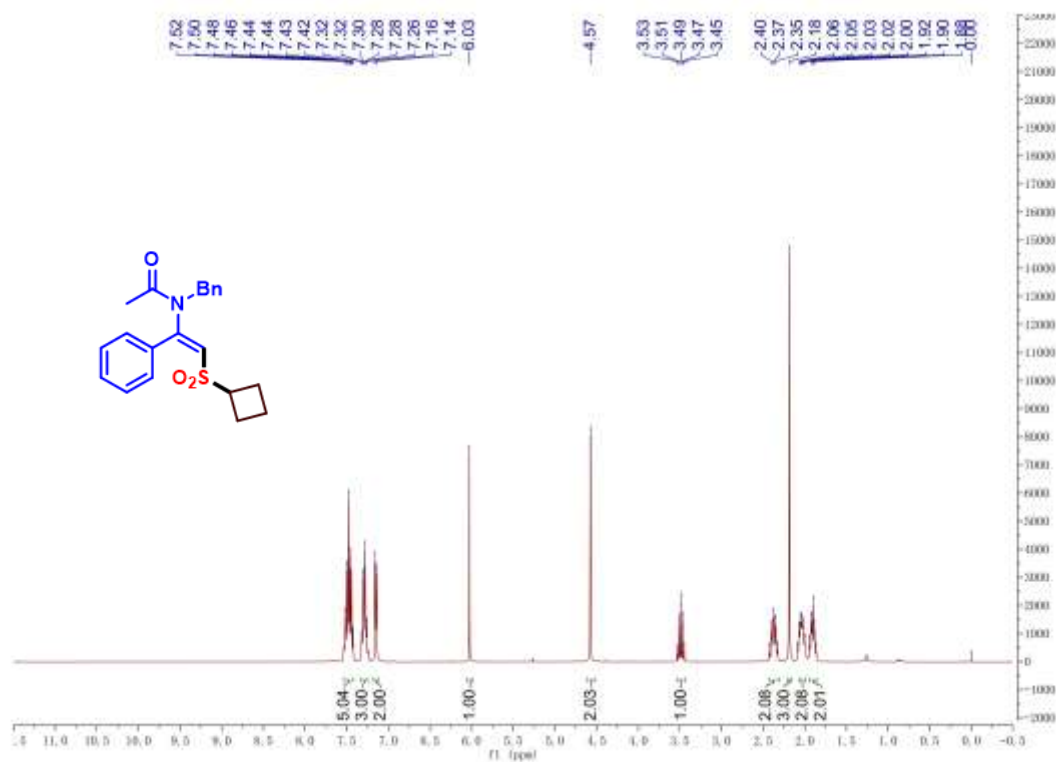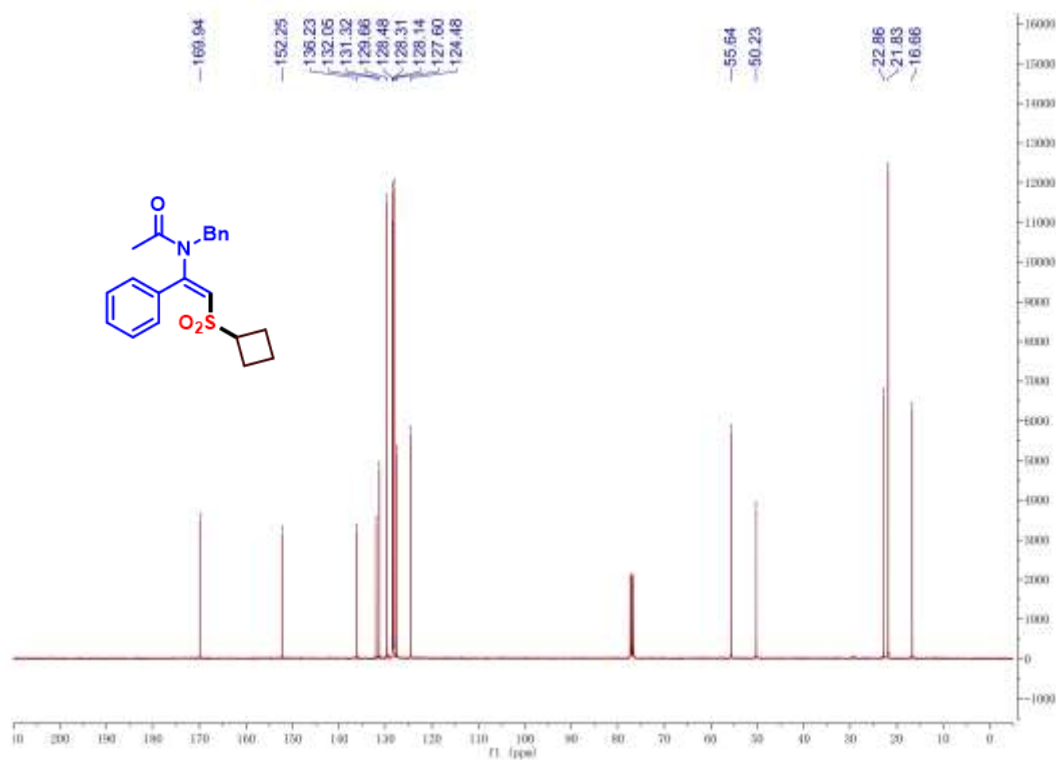

(*E*)-*N*-benzyl-*N*-(2-(cyclobutylsulfonyl)-1-phenylvinyl)acetamide (**3ah**)

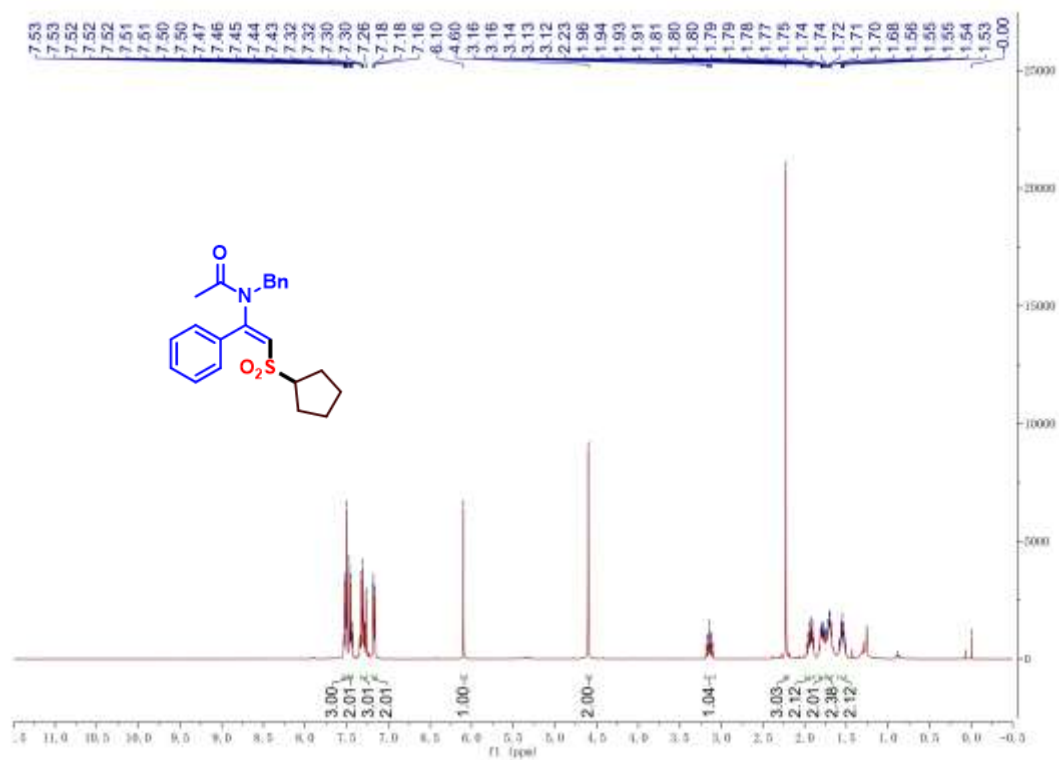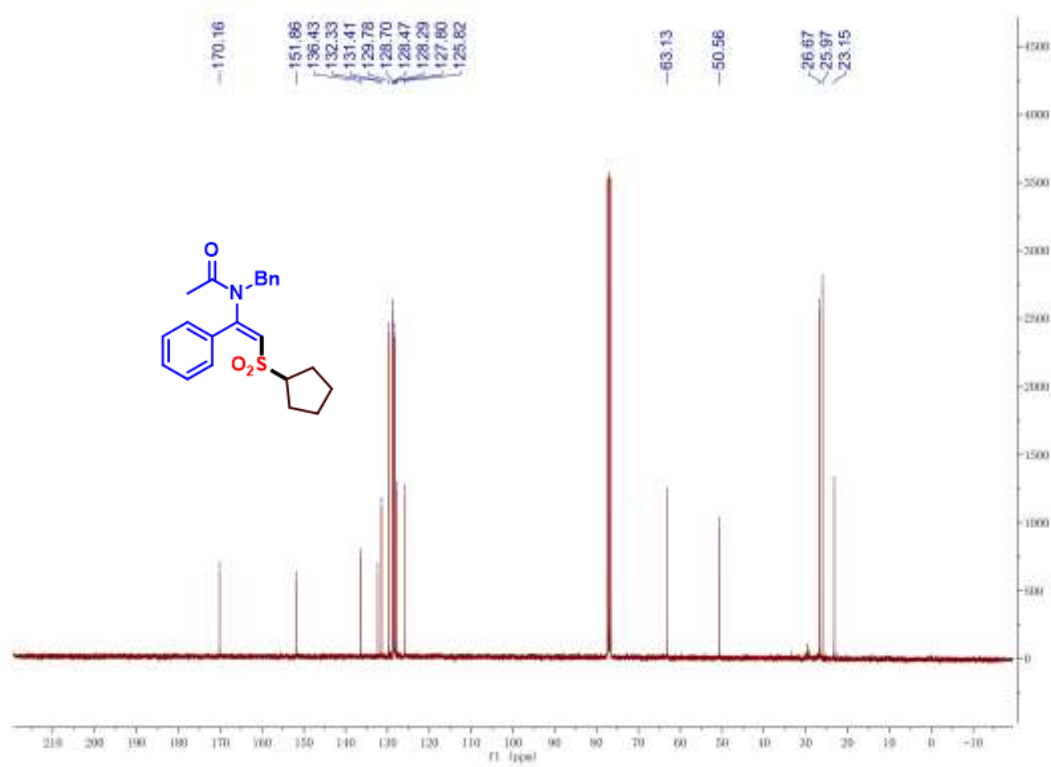

(E)-N-benzyl-N-(2-(cyclohexylsulfonyl)-1-phenylvinyl)acetamide (**3ai**)

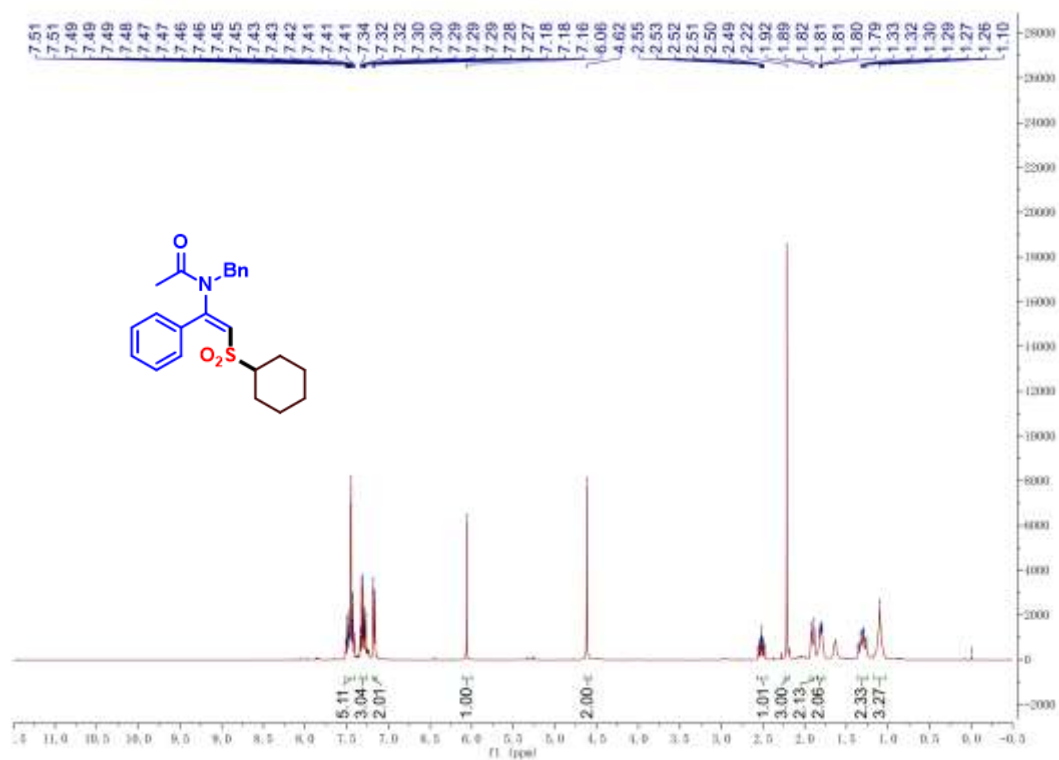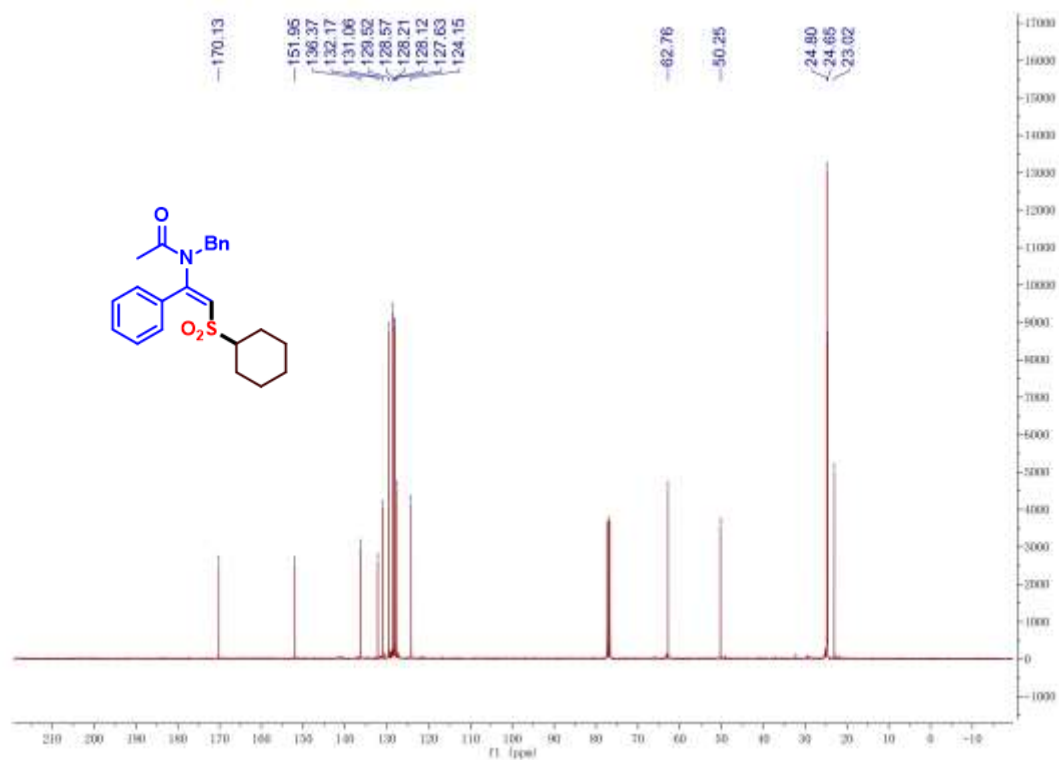

(E)-N-benzyl-N-(2-((4,4-difluorocyclohexyl)sulfonyl)-1-phenylvinyl)acetamide (**3aj**)

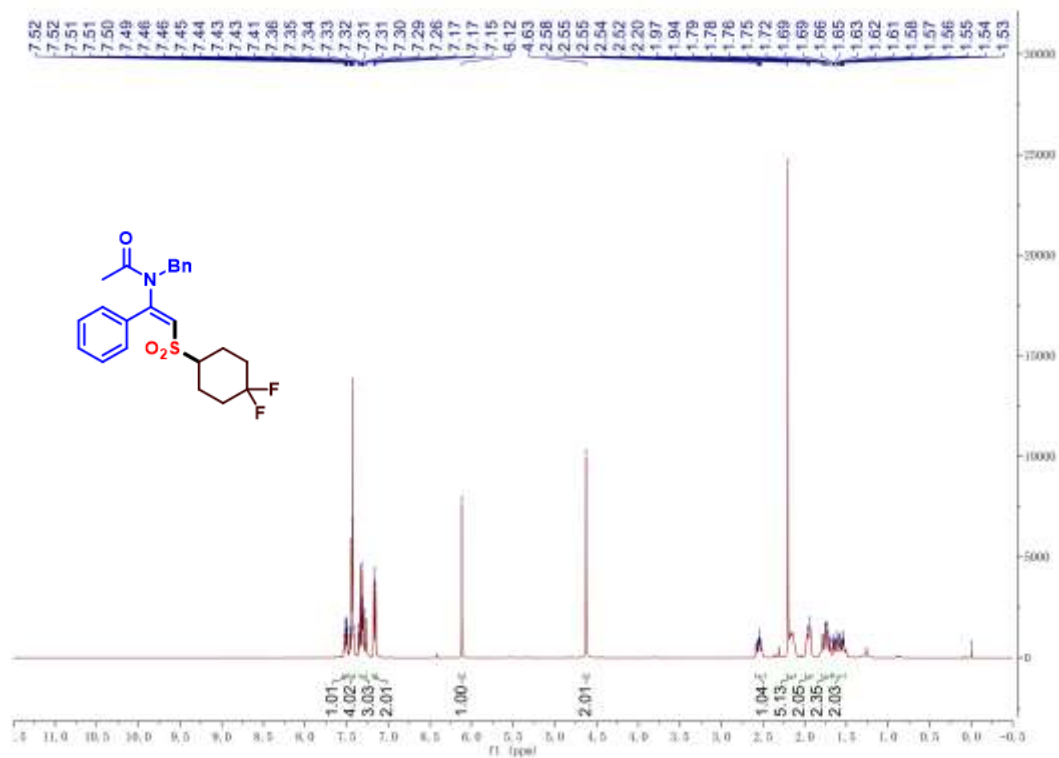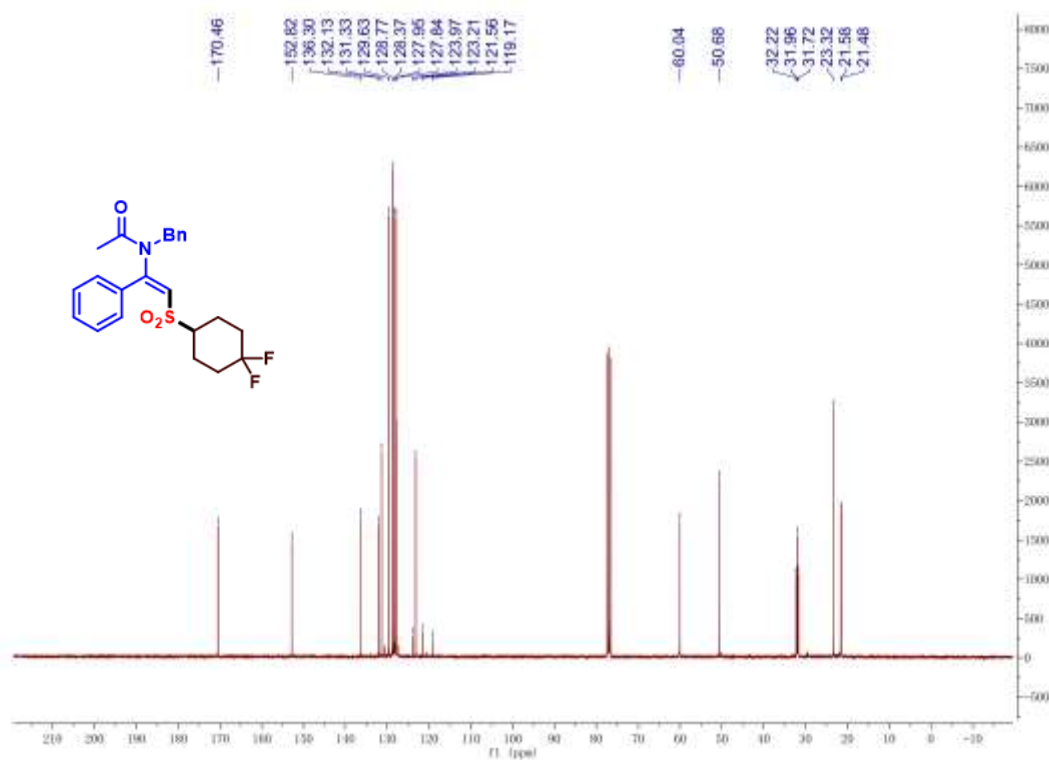

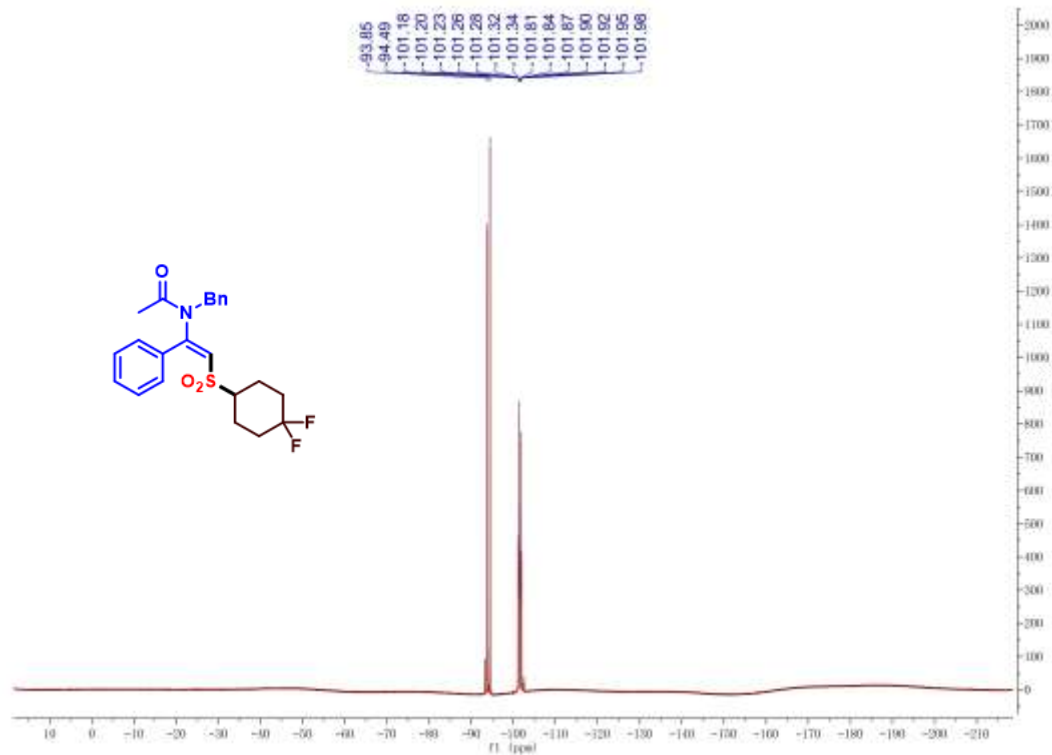

*(E)*-*N*-benzyl-*N*-(2-(cyclohex-3-en-1-yl)sulfonyl)-1-phenylvinylacetamide (**3ak**)

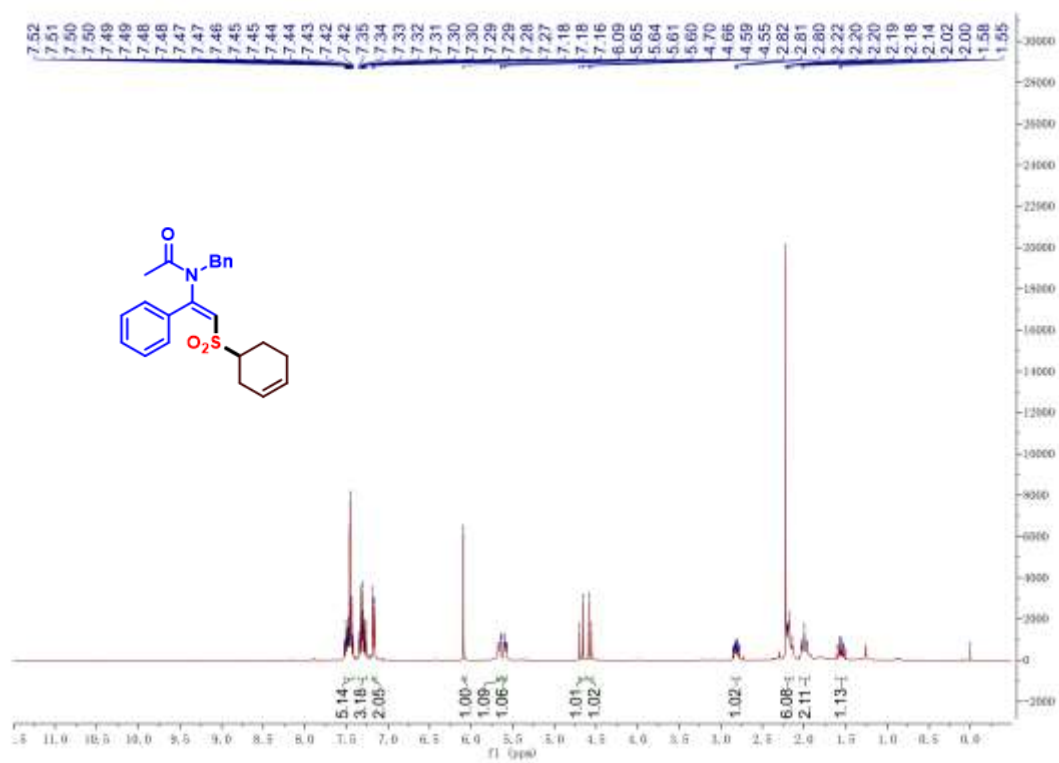

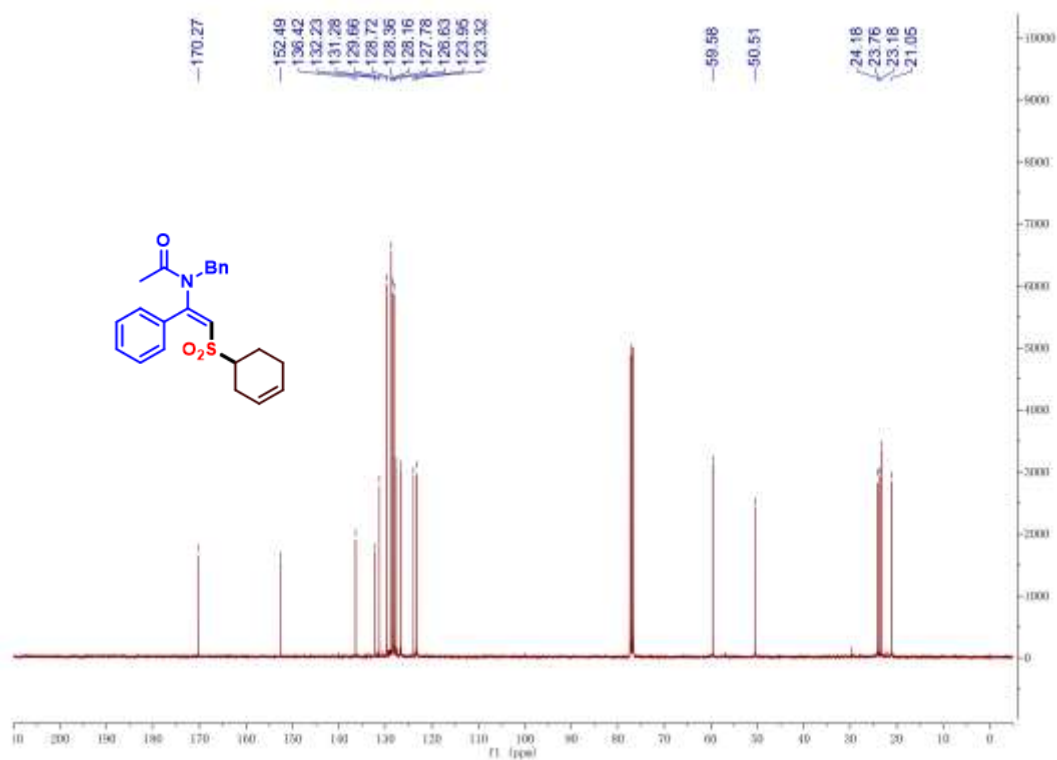

*tert*-butyl(*E*)-3-((2-(*N*-benzylacetamido)-2-phenylvinyl)sulfonyl)azetidine-1-carboxylate (**3a**)

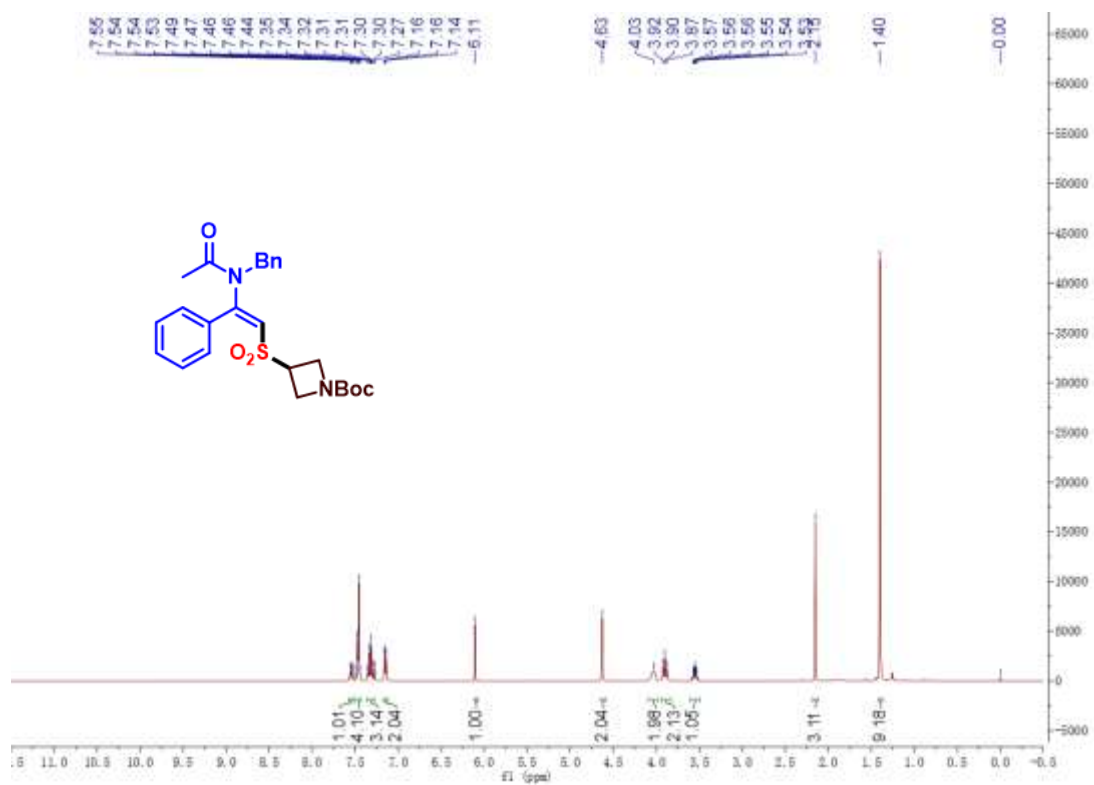

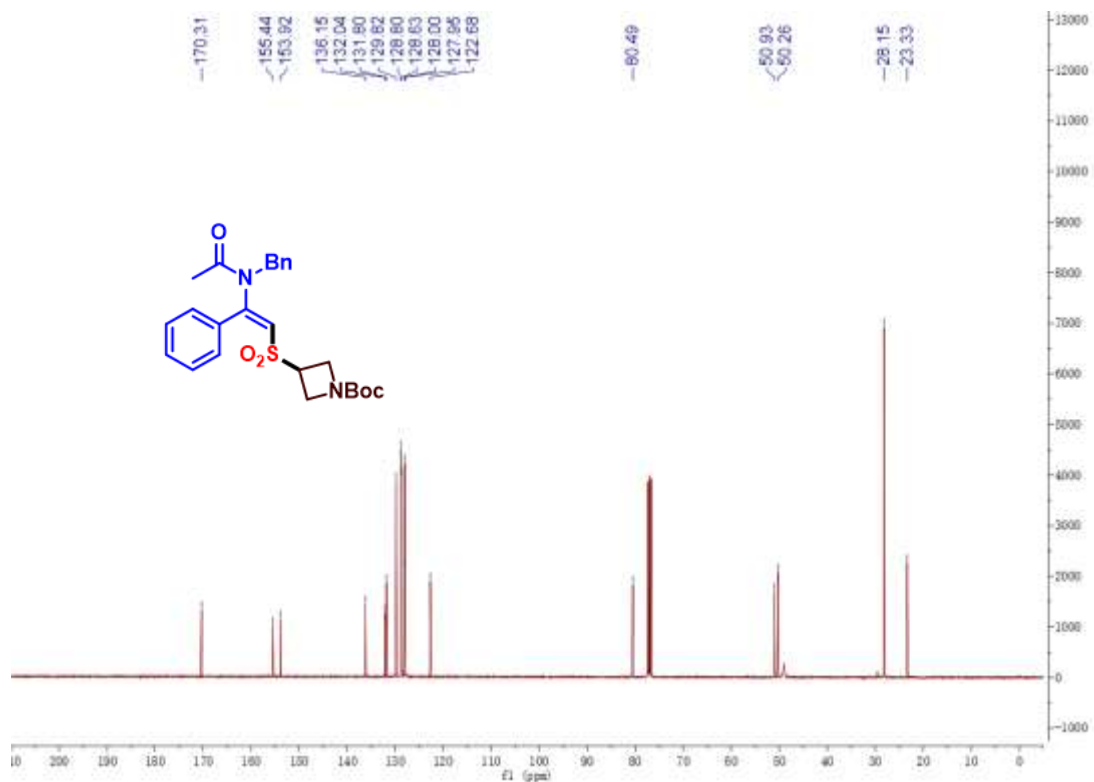

(*E*)-*N*-benzyl-*N*-(1-phenyl-2-((tetrahydro-2*H*-pyran-4-yl)sulfonyl)vinyl)acetamide  
(**3am**)

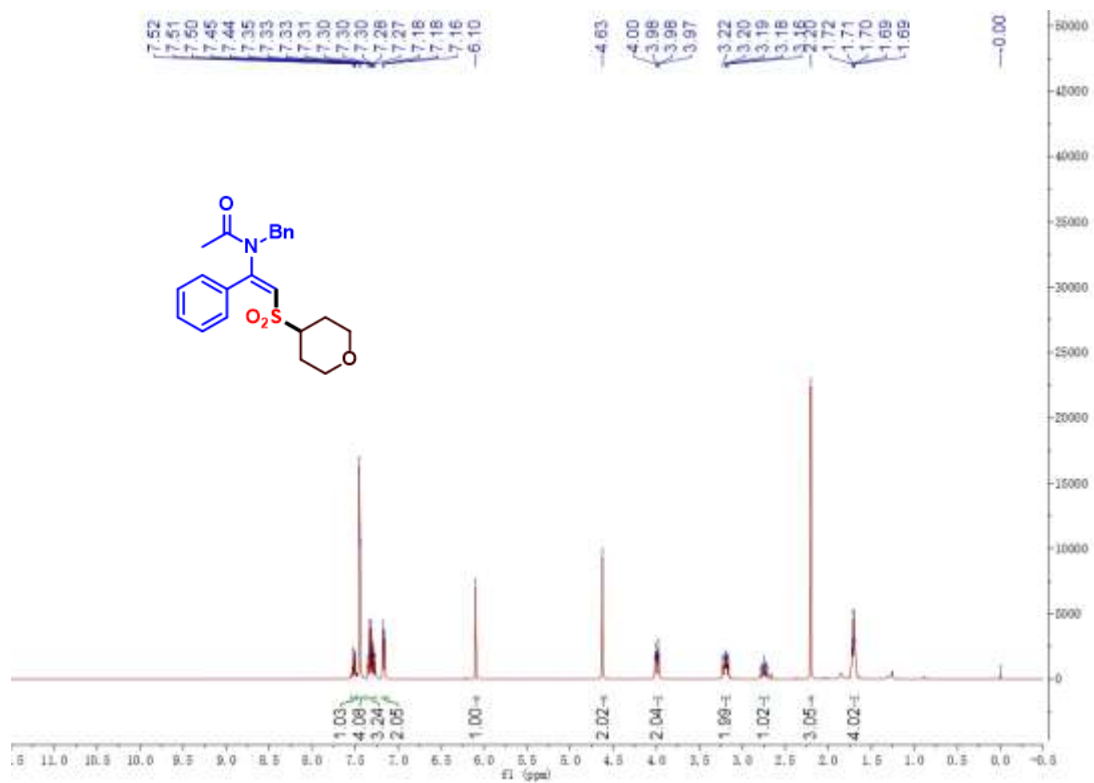

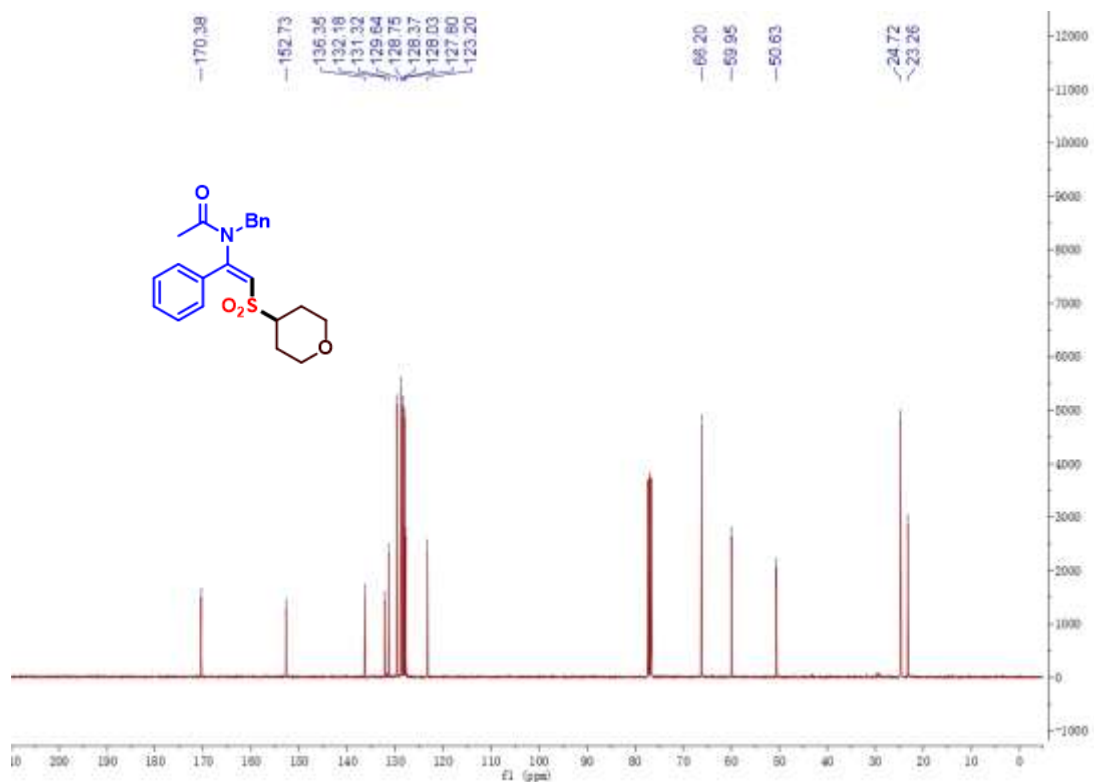

**(E)-N-benzyl-N-(2-(isopropylsulfonyl)-1-phenylvinyl)acetamide (3an)**

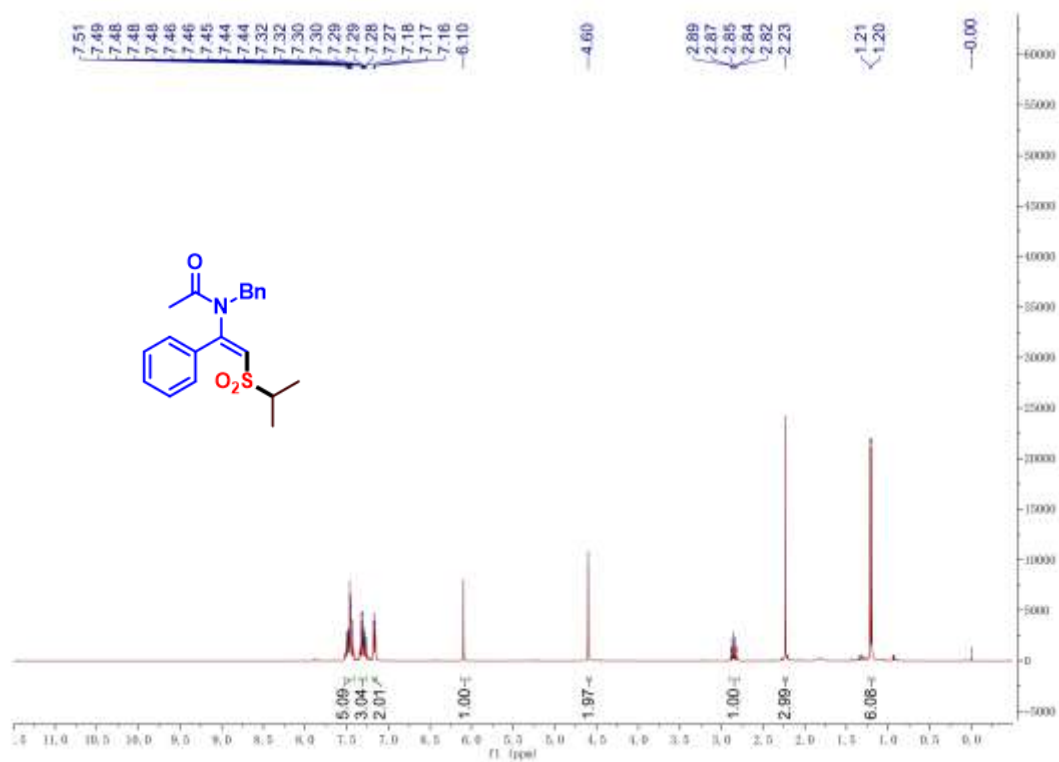



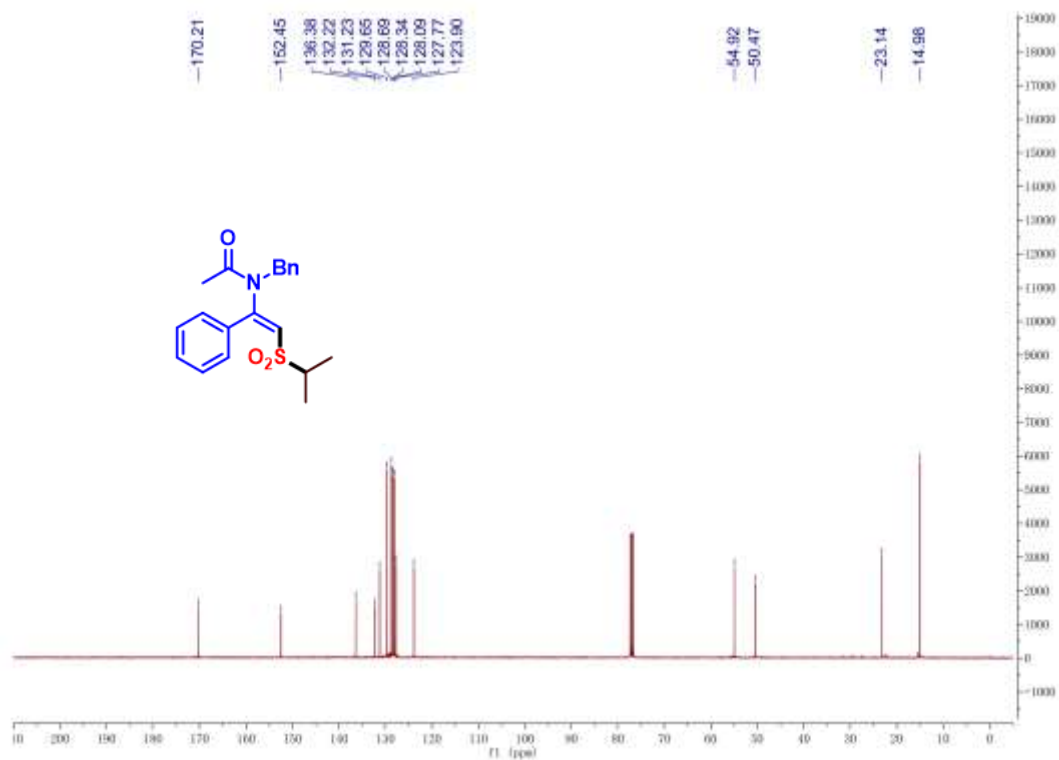

(E)-N-benzyl-N-(2-(sec-butylsulfonyl)-1-phenylvinyl)acetamide (**3ao**)

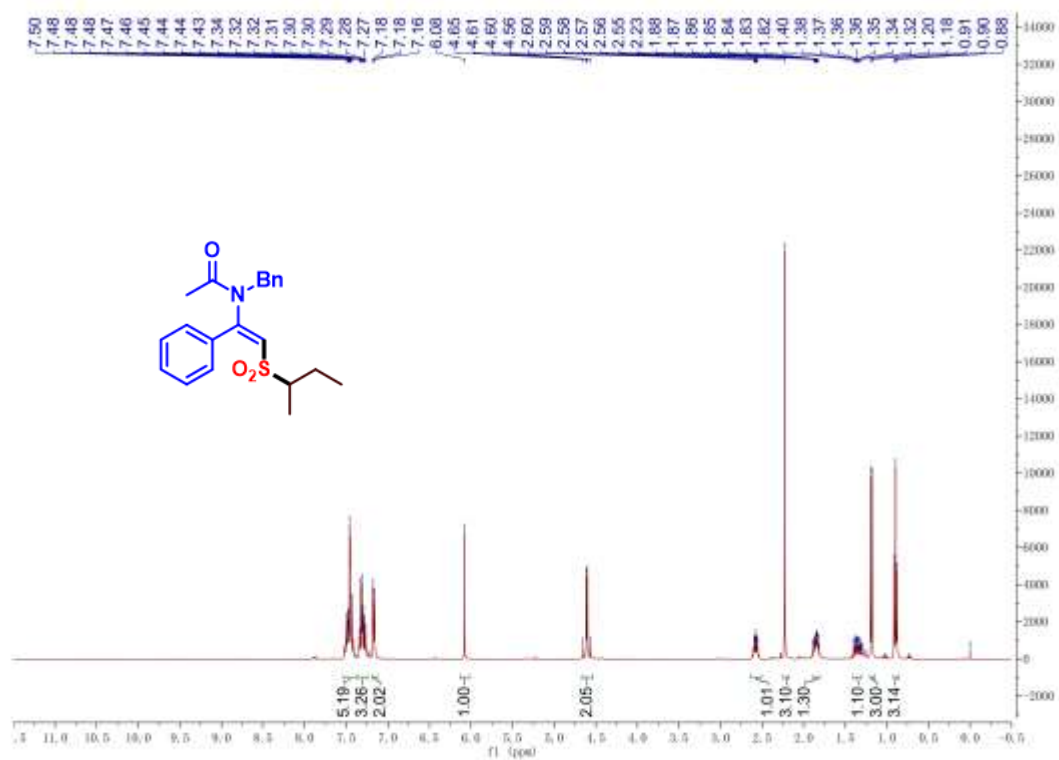

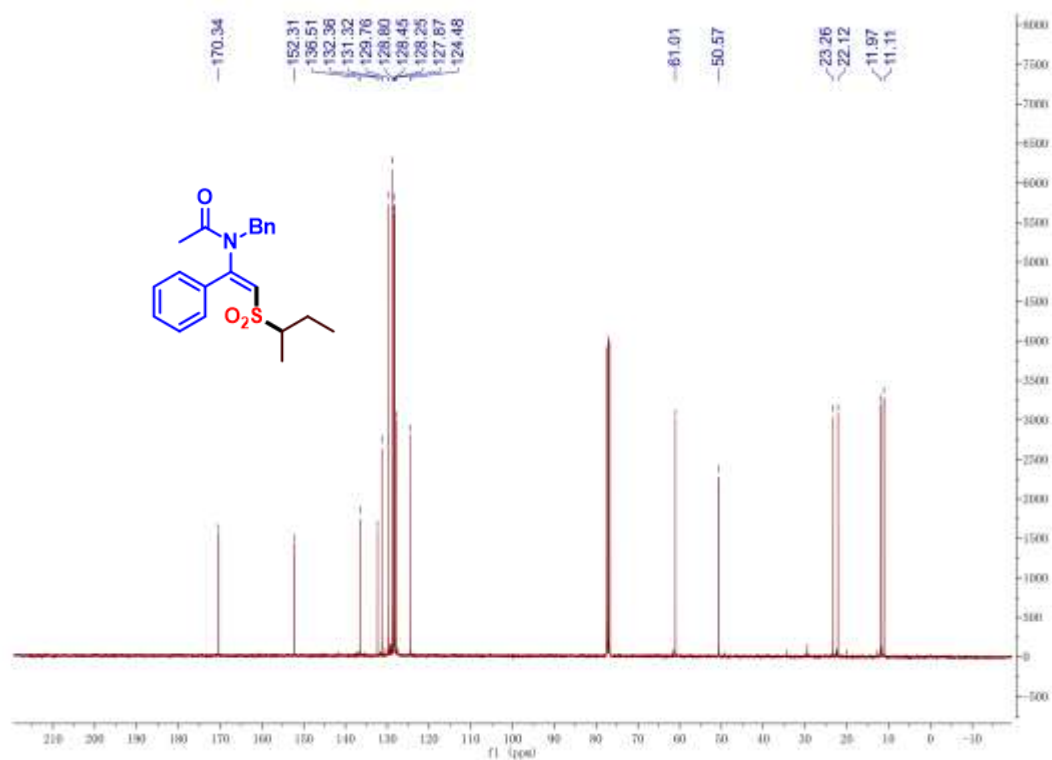

**(*E*)-2-(((1*S*,3*S*,5*S*)-adamantan-1-yl)sulfonyl)-1-phenylvinyl)-*N*-benzylacetamide (**3ap**)**

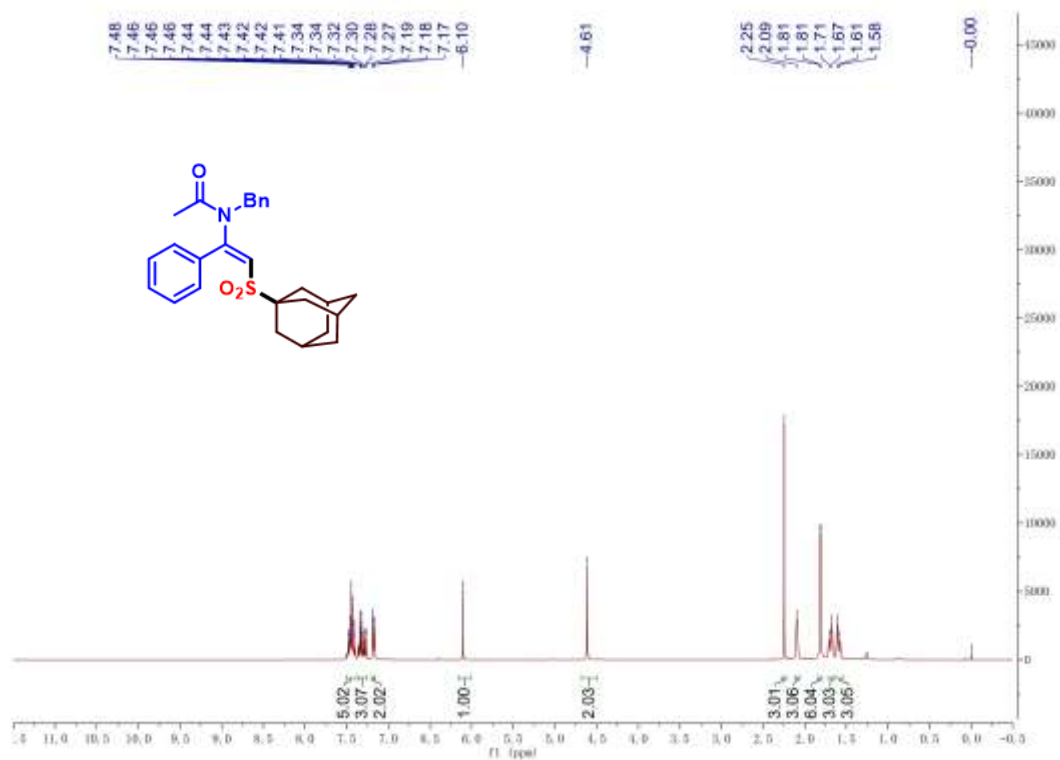

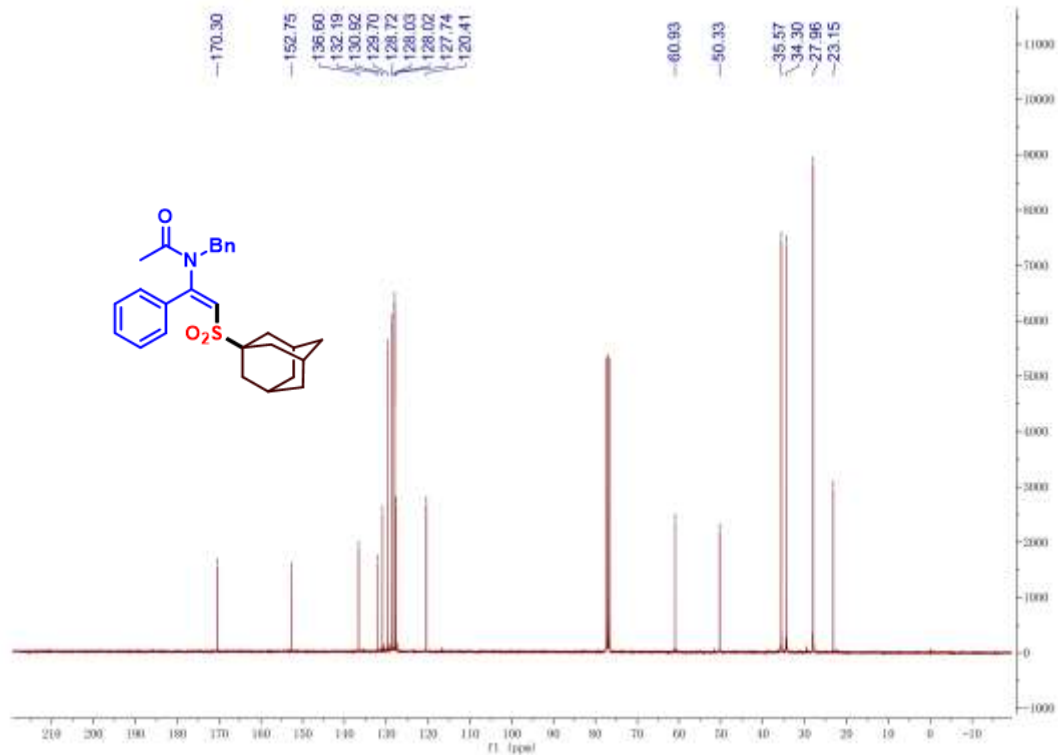

methyl(*E*)-4-((2-(*N*-benzylacetamido)-2-phenylvinyl)sulfonyl)bicyclo[2.2.2]octane-1-carboxylate (**3aq**)

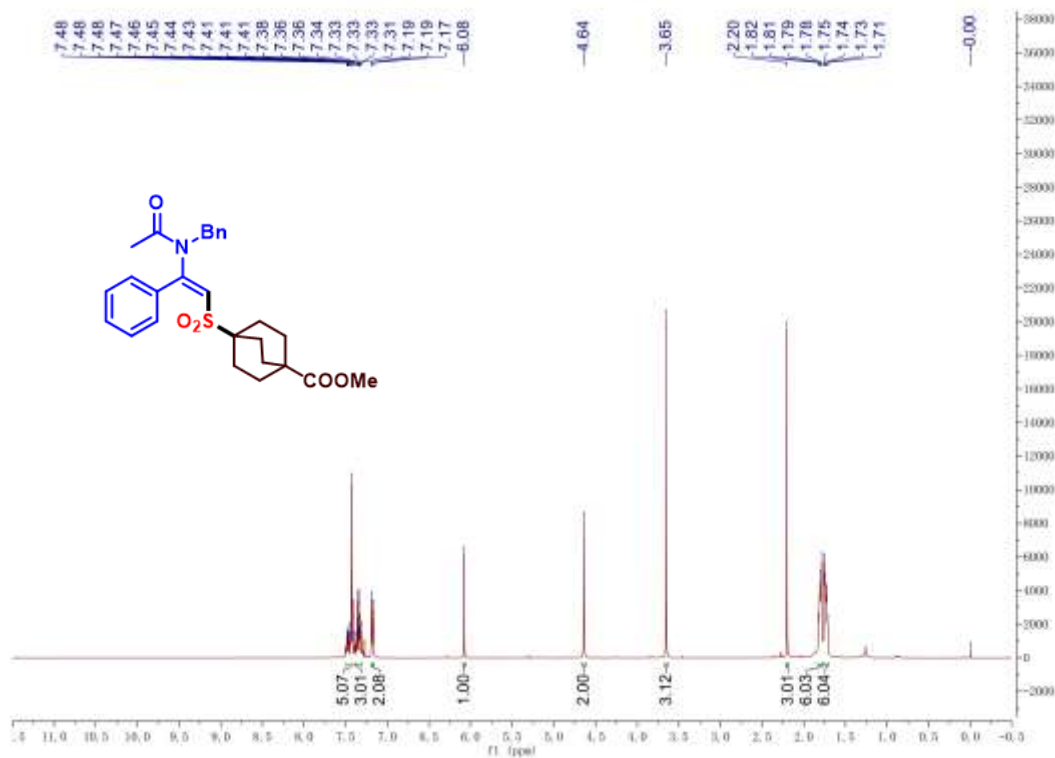

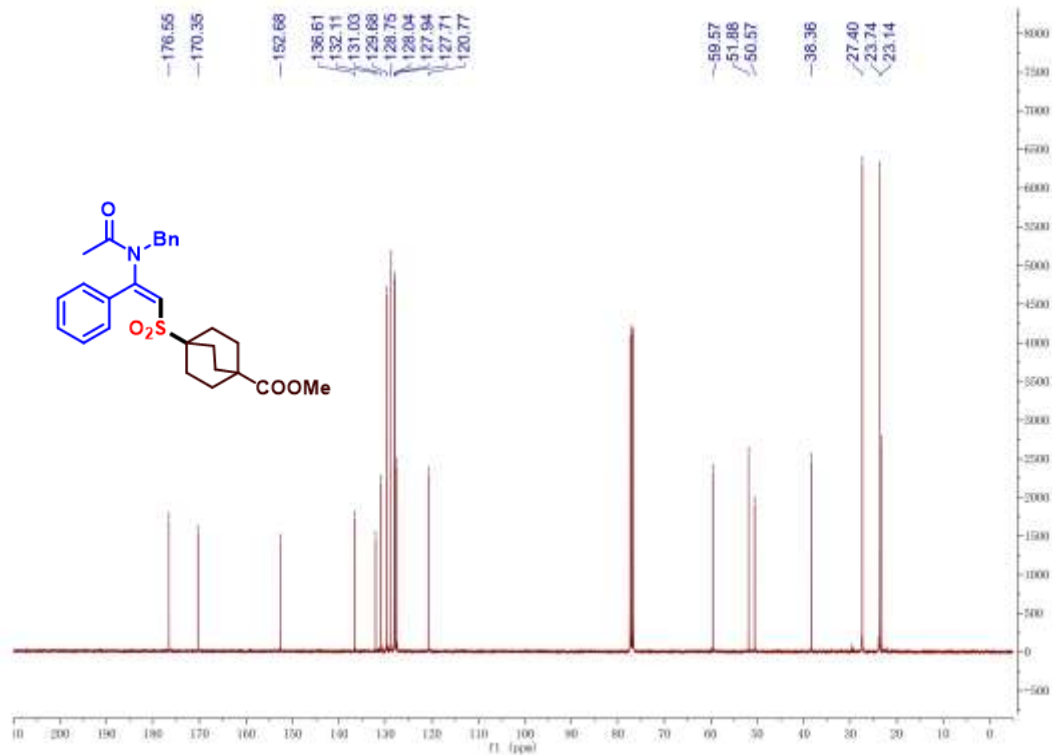

methyl(*E*)-3-((2-(*N*-benzylacetamido)-2-phenylvinyl)sulfonyl)bicyclo[1.1.1]pentane-1-carboxylate (**3ar**)

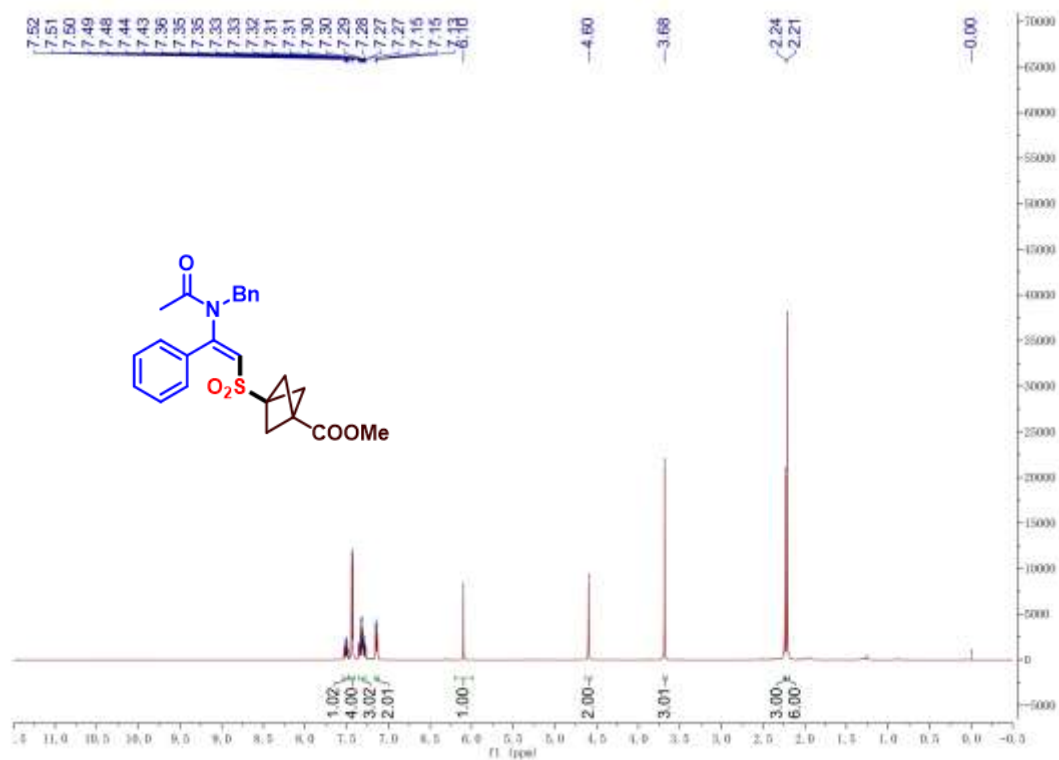

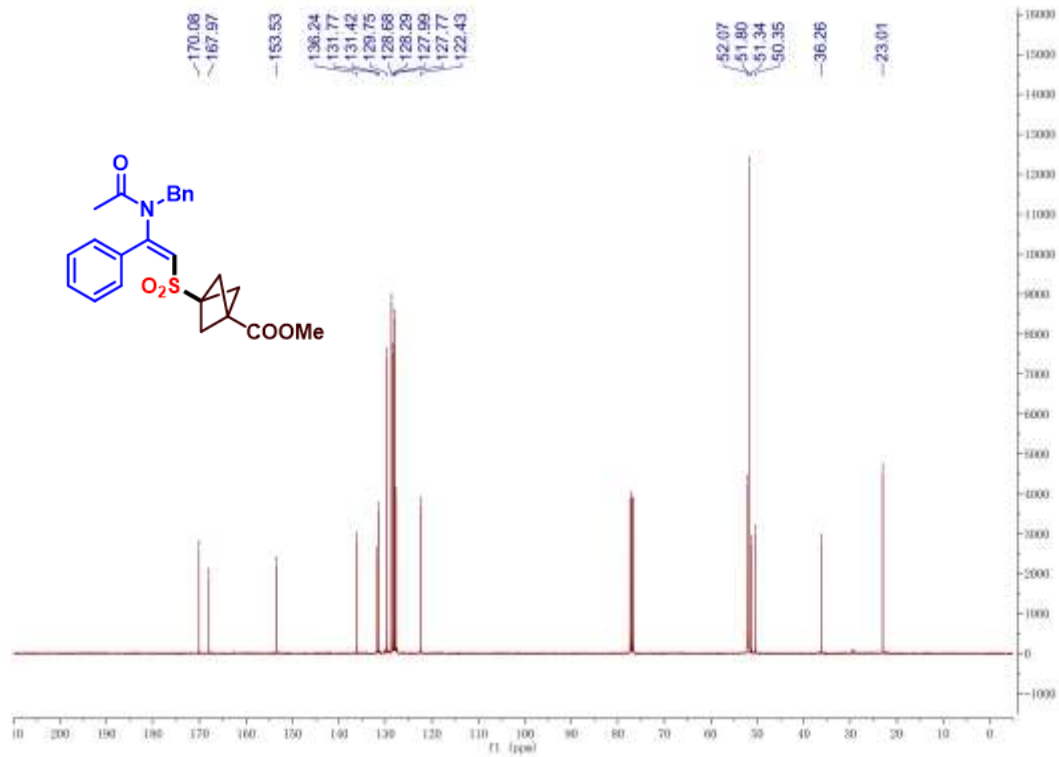

1-acetyl-3-methyl-3-((methylsulfonyl)methyl)-5-phenyl-1,3-dihydro-2H-pyrrol-2-one  
(5aa)

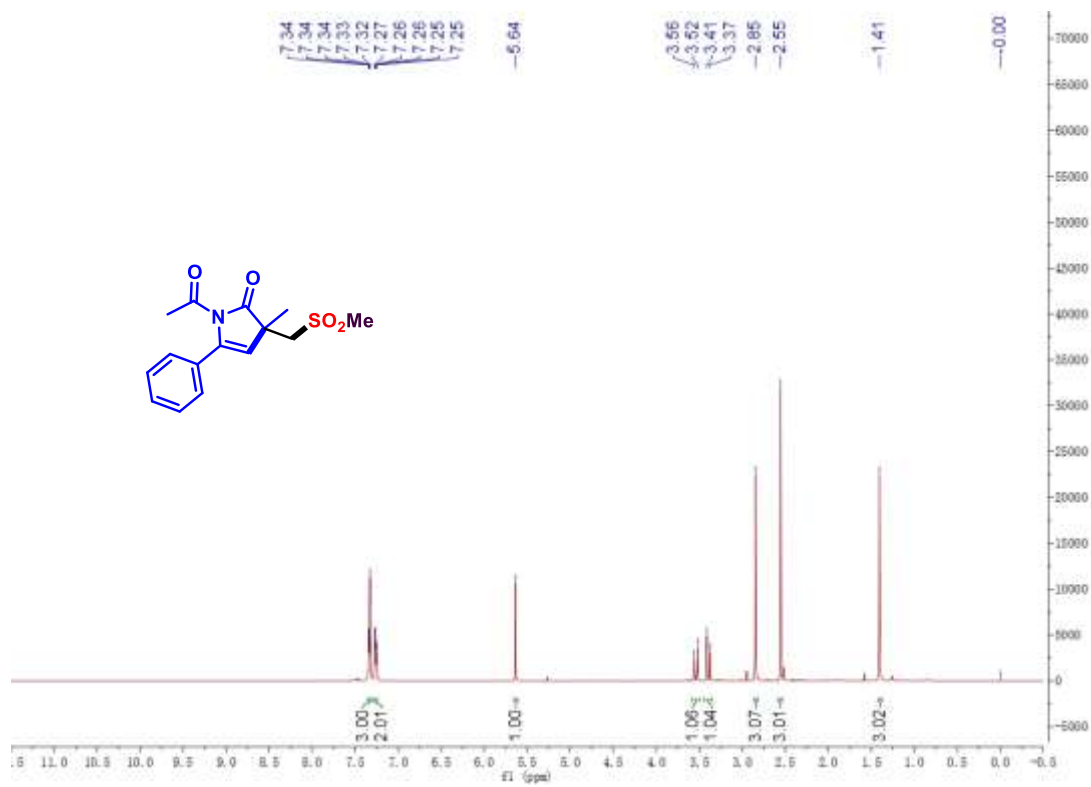

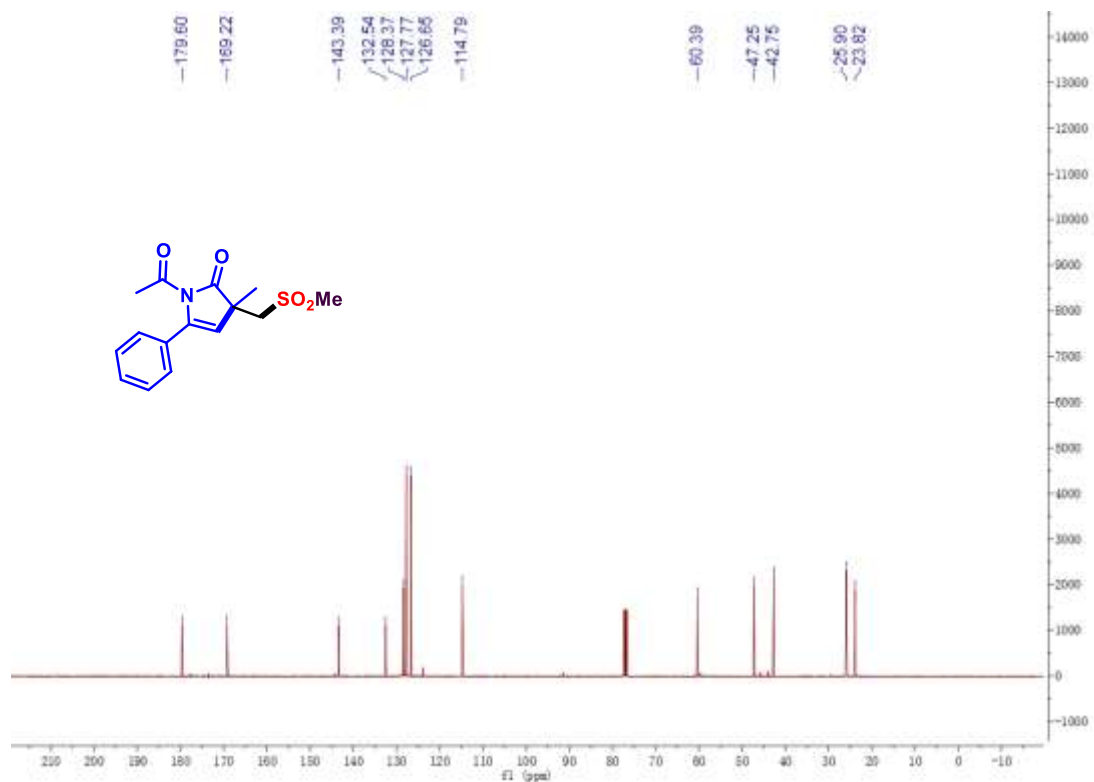

1-acetyl-3-methyl-3-((methylsulfonyl)methyl)-5-(p-tolyl)-1,3-dihydro-2H-pyrrol-2-one (5ba)

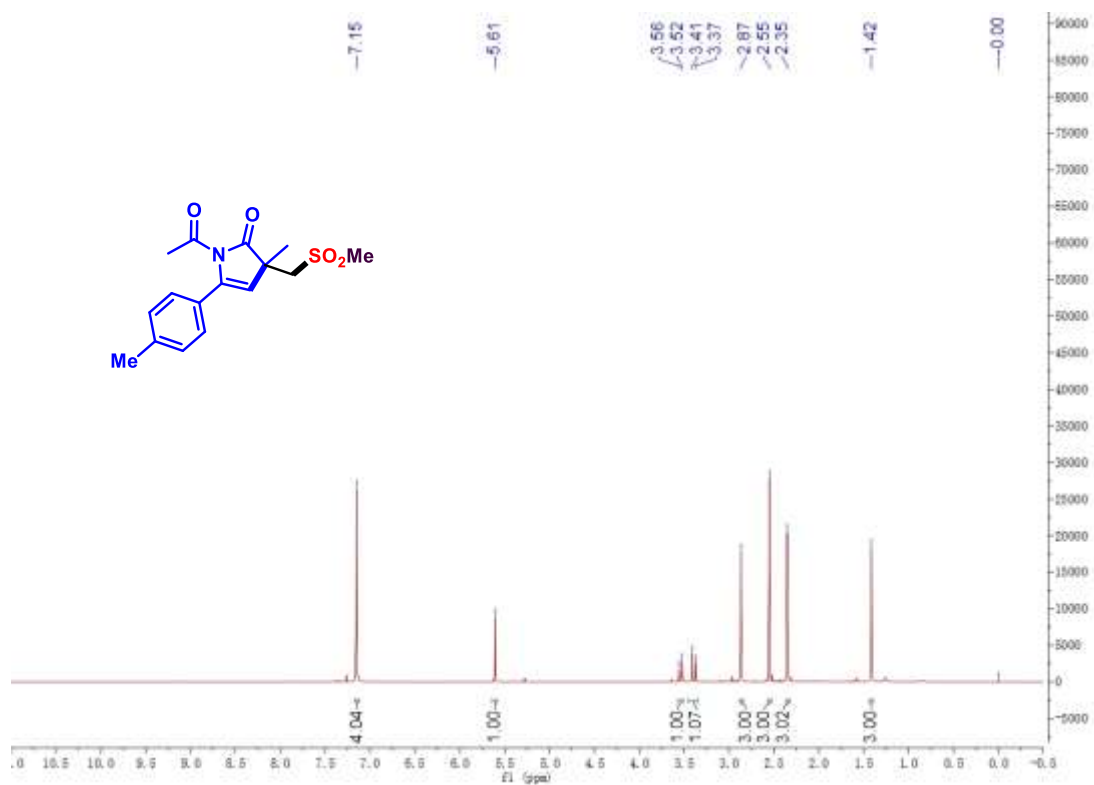

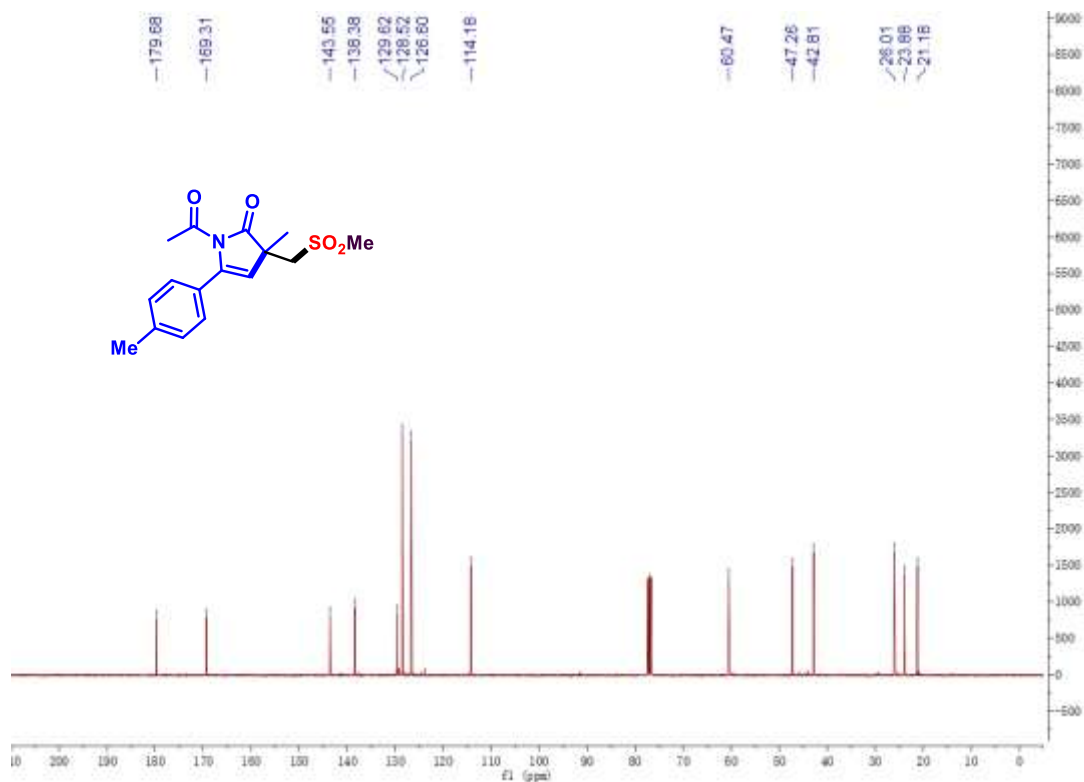

1-acetyl-3-methyl-3-((methylsulfonyl)methyl)-5-(m-tolyl)-1,3-dihydro-2H-pyrrol-2-one (5ca)

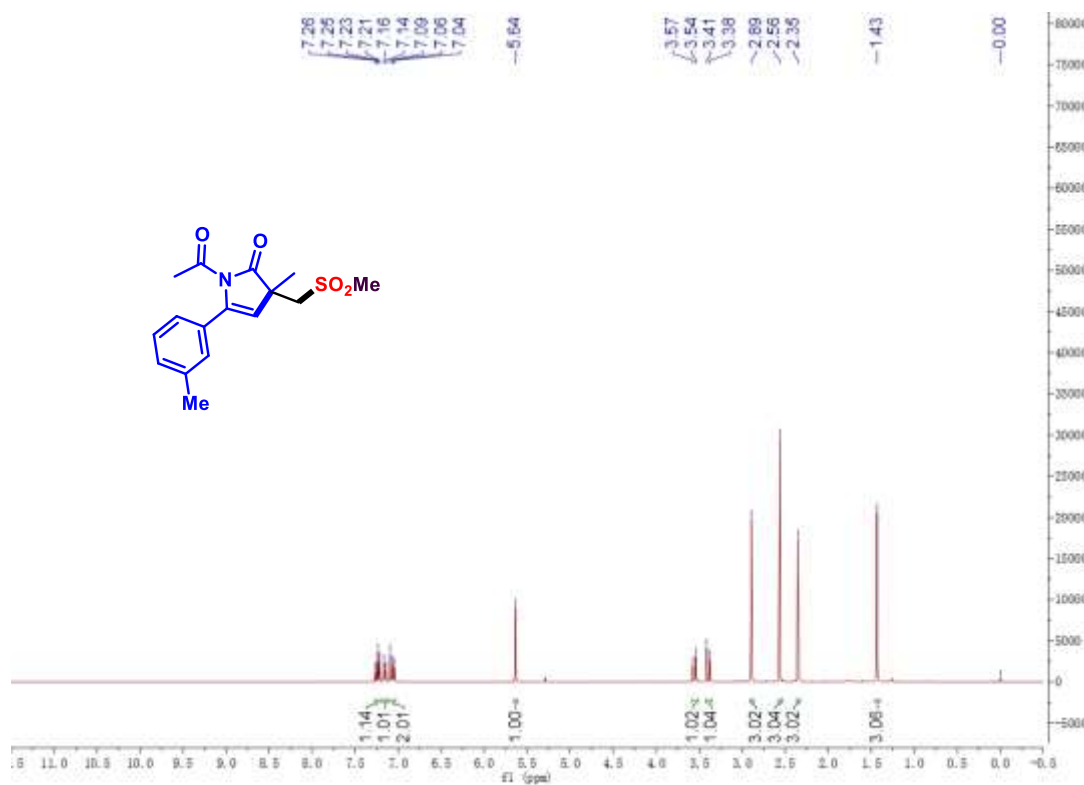

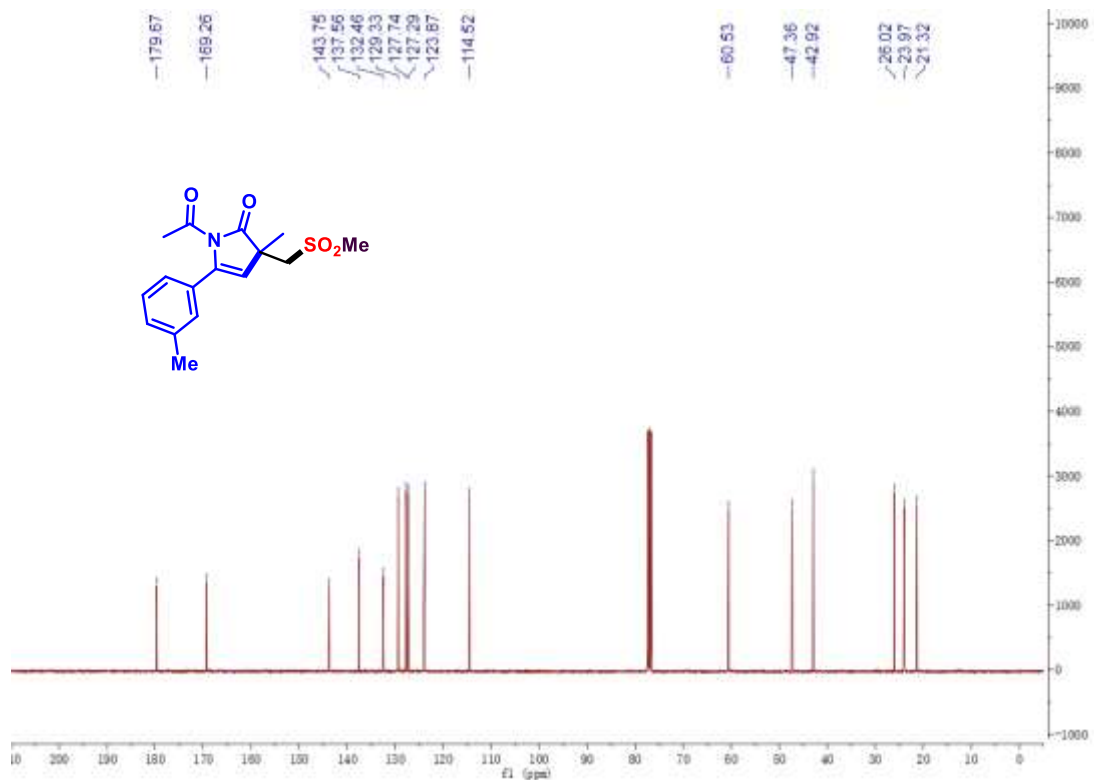

1-acetyl-3-methyl-3-((methylsulfonyl)methyl)-5-(o-tolyl)-1,3-dihydro-2H-pyrrol-2-one (5da)

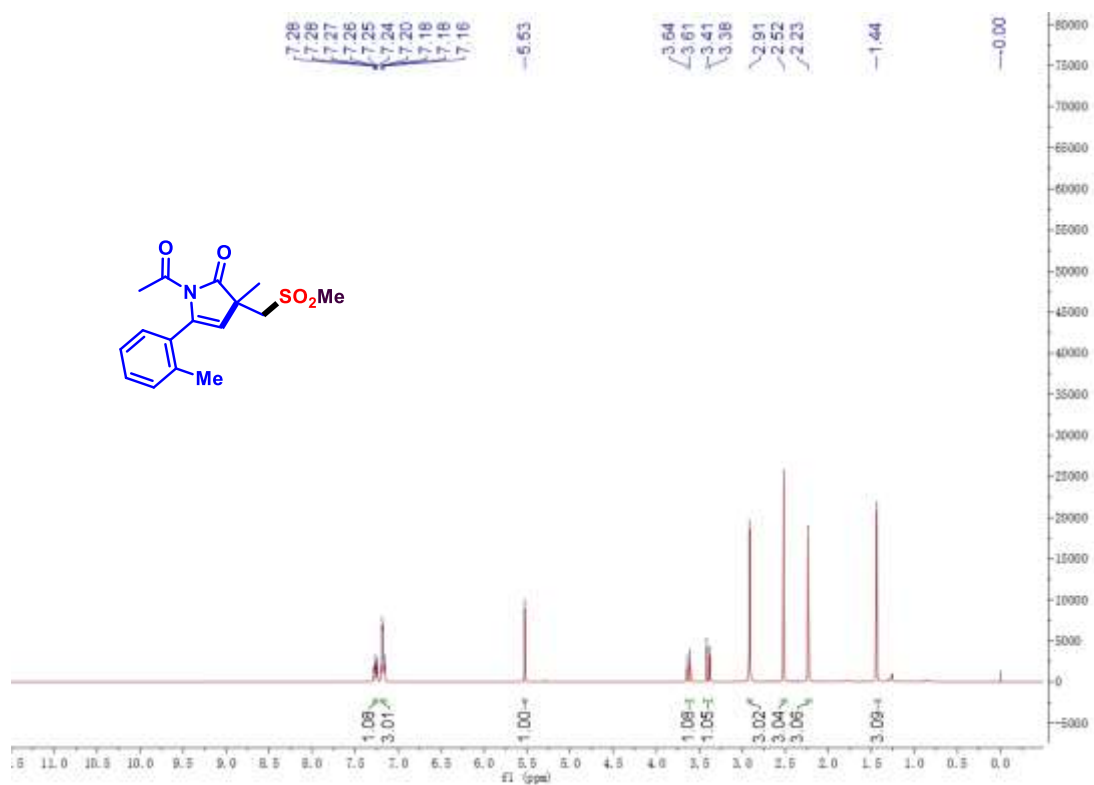



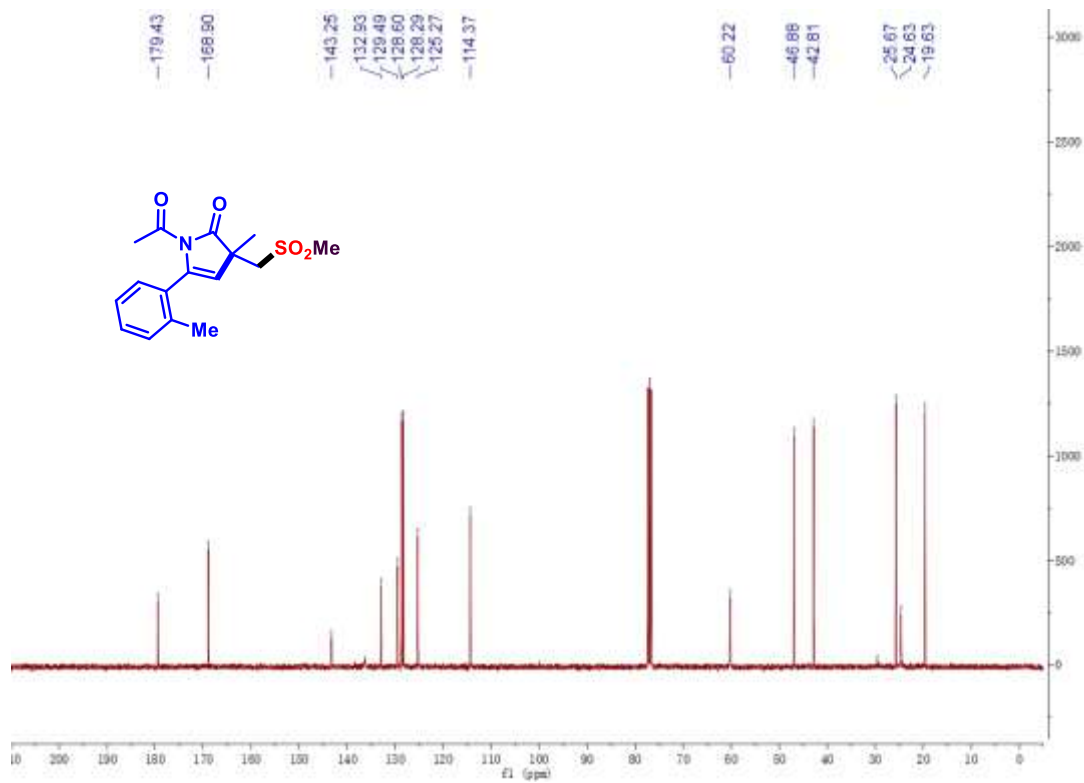

5-([1,1'-biphenyl]-4-yl)-1-acetyl-3-methyl-3-((methylsulfonyl)methyl)-1,3-dihydro-2-*H*-pyrrol-2-one (**5ea**)

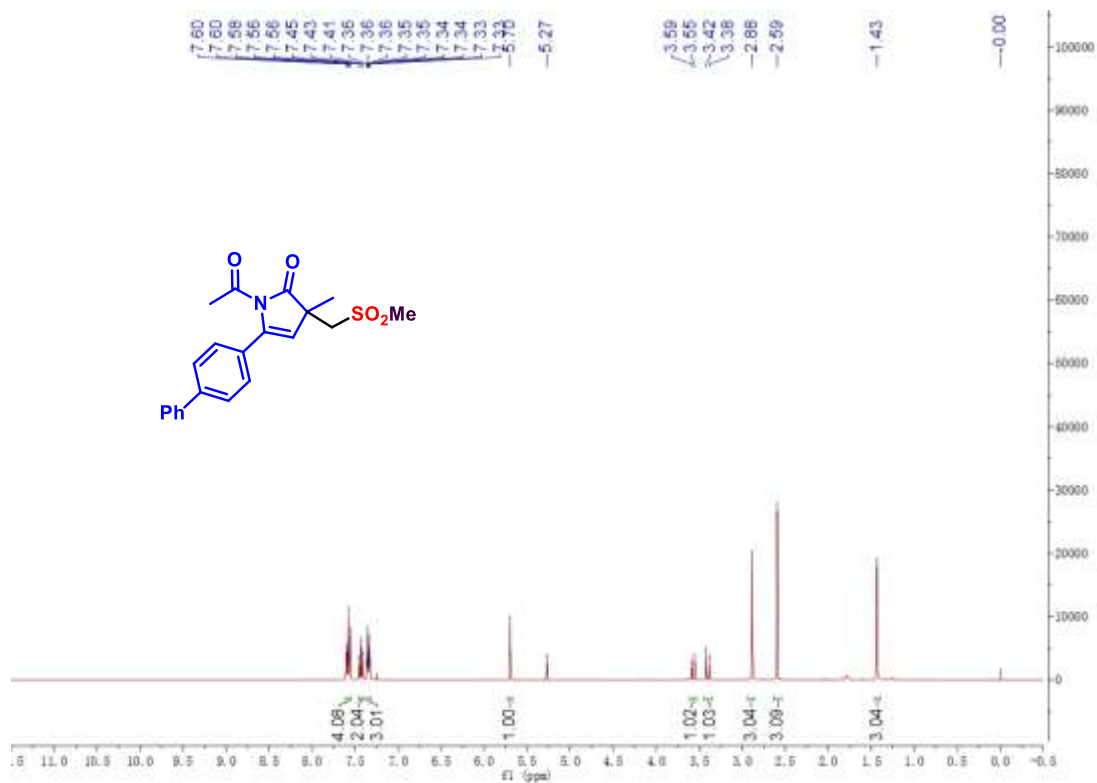

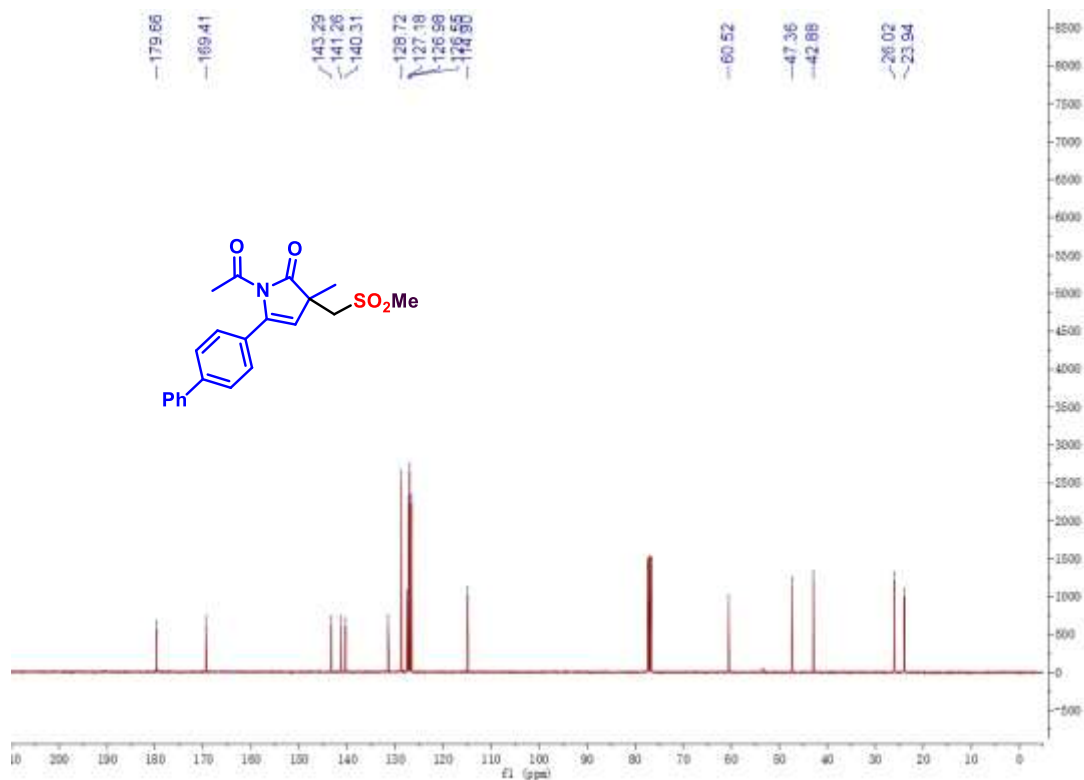

methyl 4-(1-acetyl-4-methyl-4-((methylsulfonyl)methyl)-5-oxo-4,5-dihydro-1H-pyrrol-2-yl)benzoate (**5fa**)

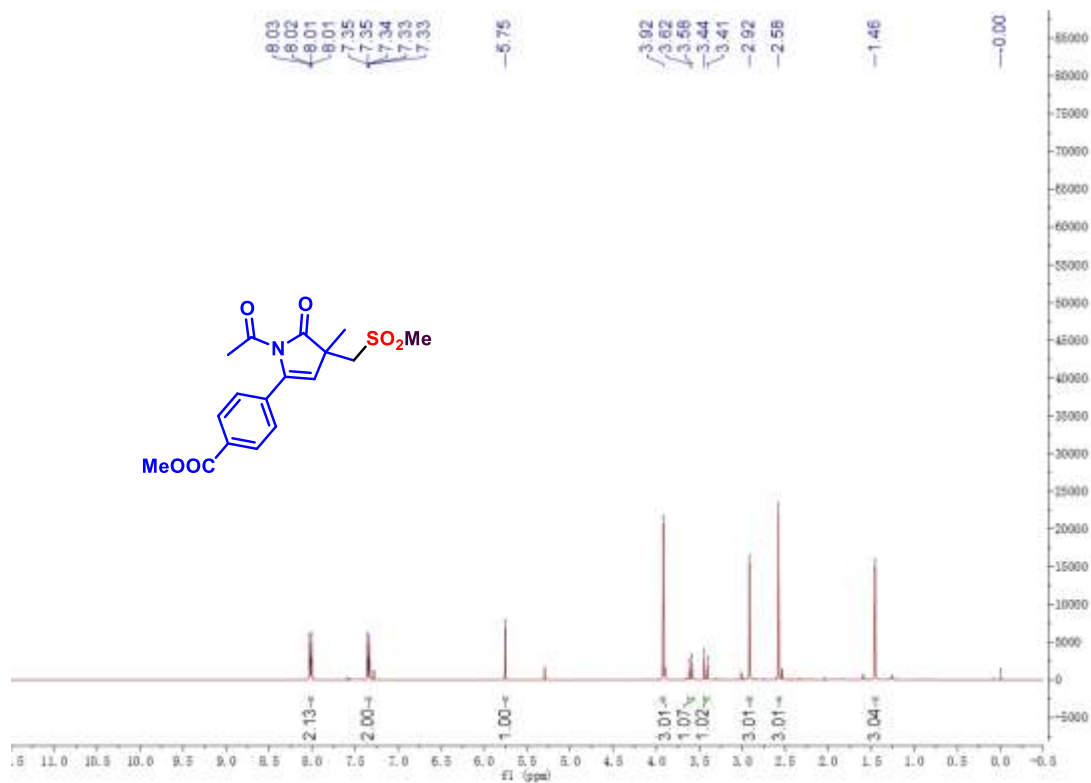

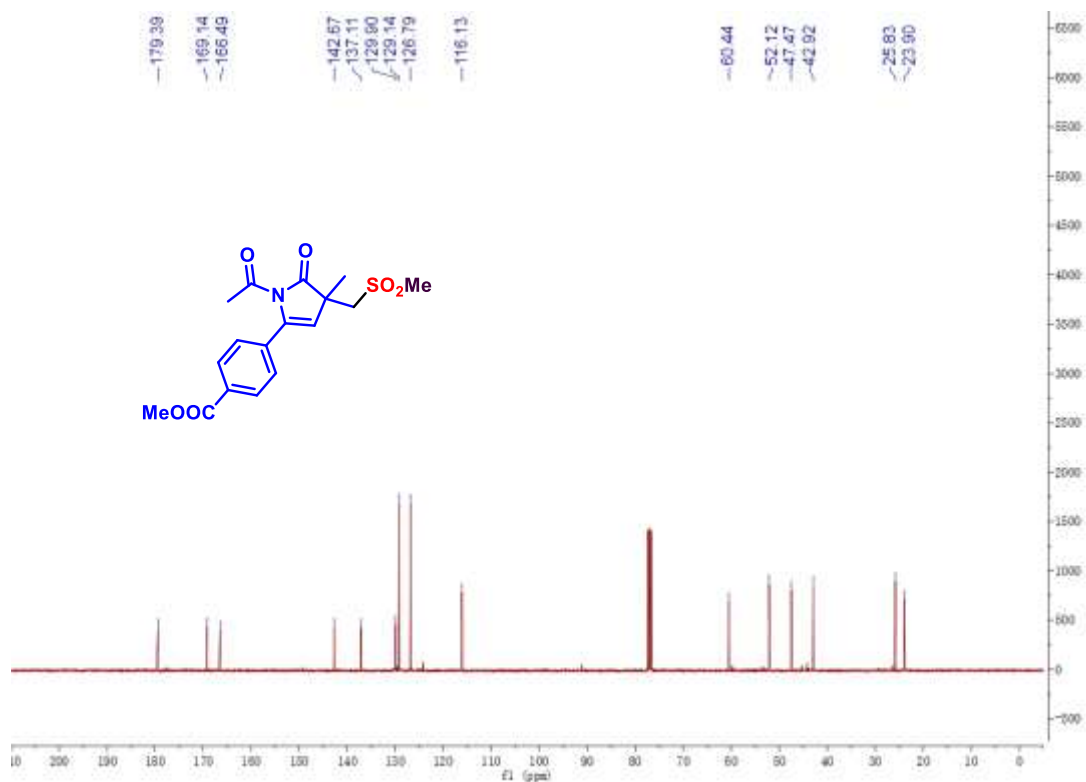

1-acetyl-5-(3-fluorophenyl)-3-methyl-3-((methylsulfonyl)methyl)-1,3-dihydro-2H-pyrol-2-one (**5ga**)

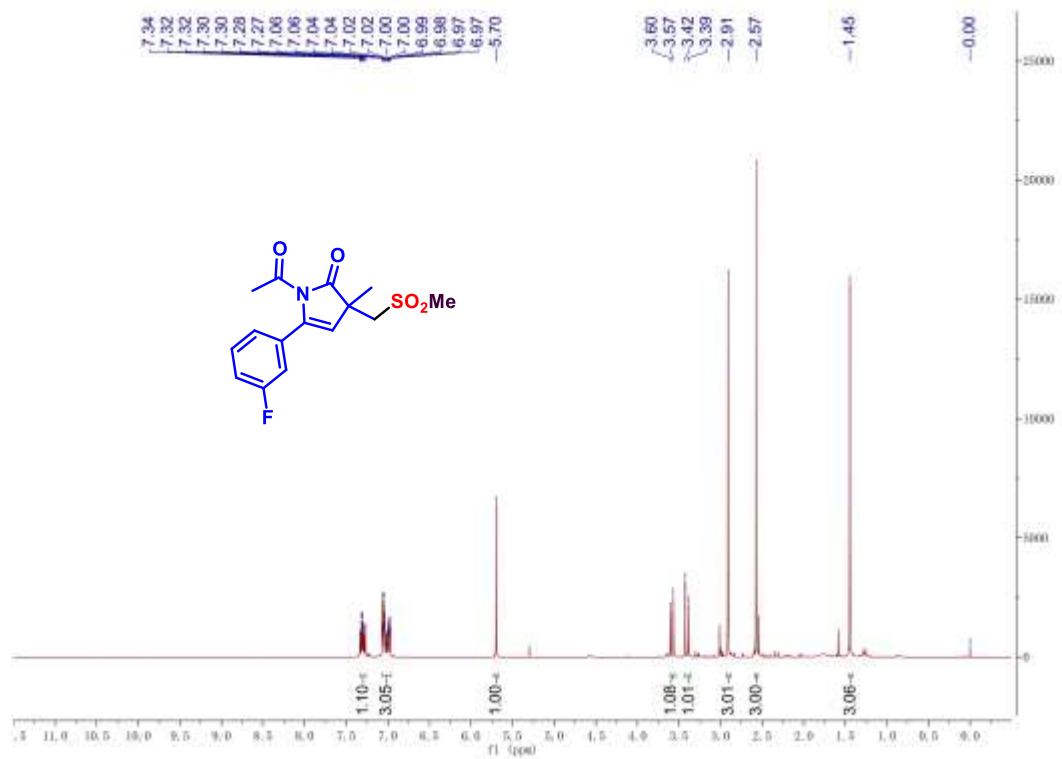

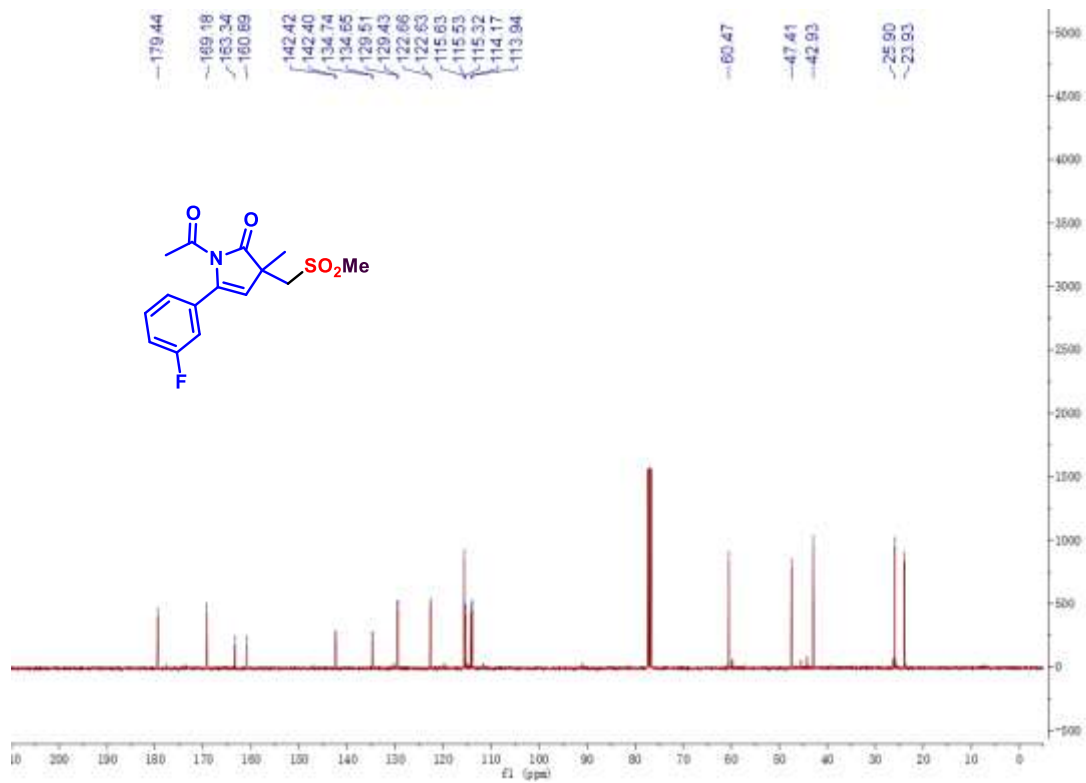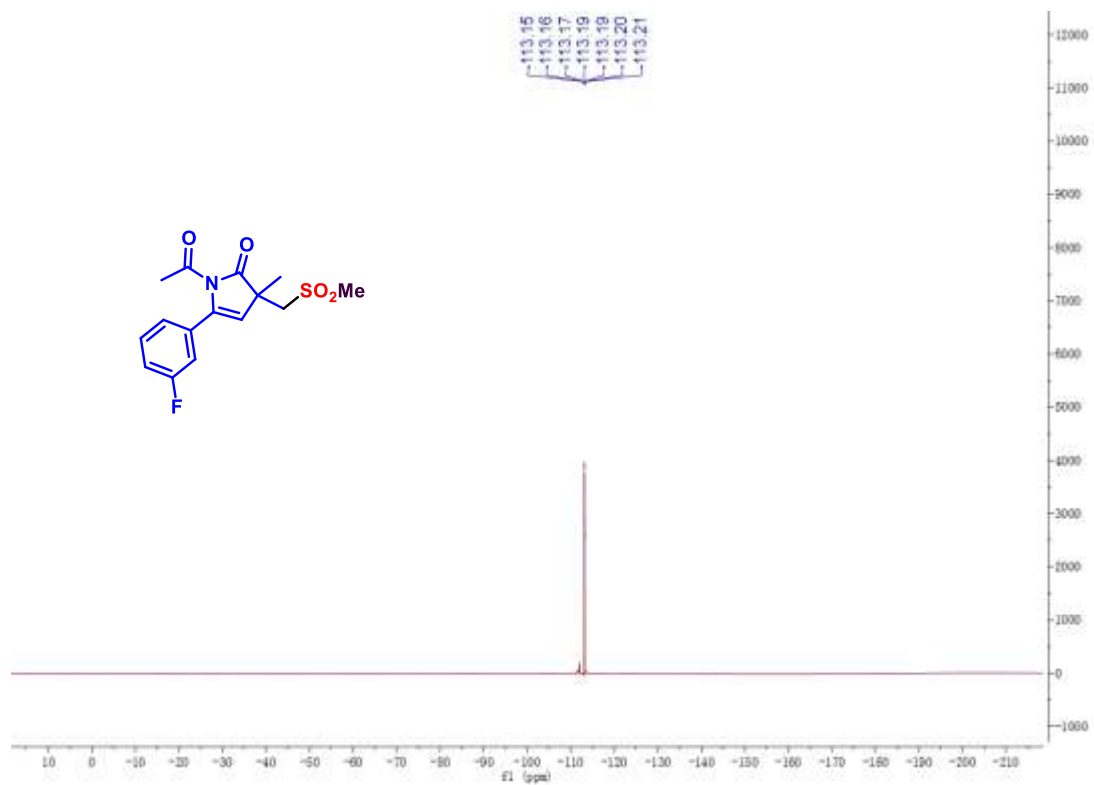

1-acetyl-5-(4-chlorophenyl)-3-methyl-3-((methylsulfonyl)methyl)-1,3-dihydro-2H-pyrrol-2-one (**5ha**)

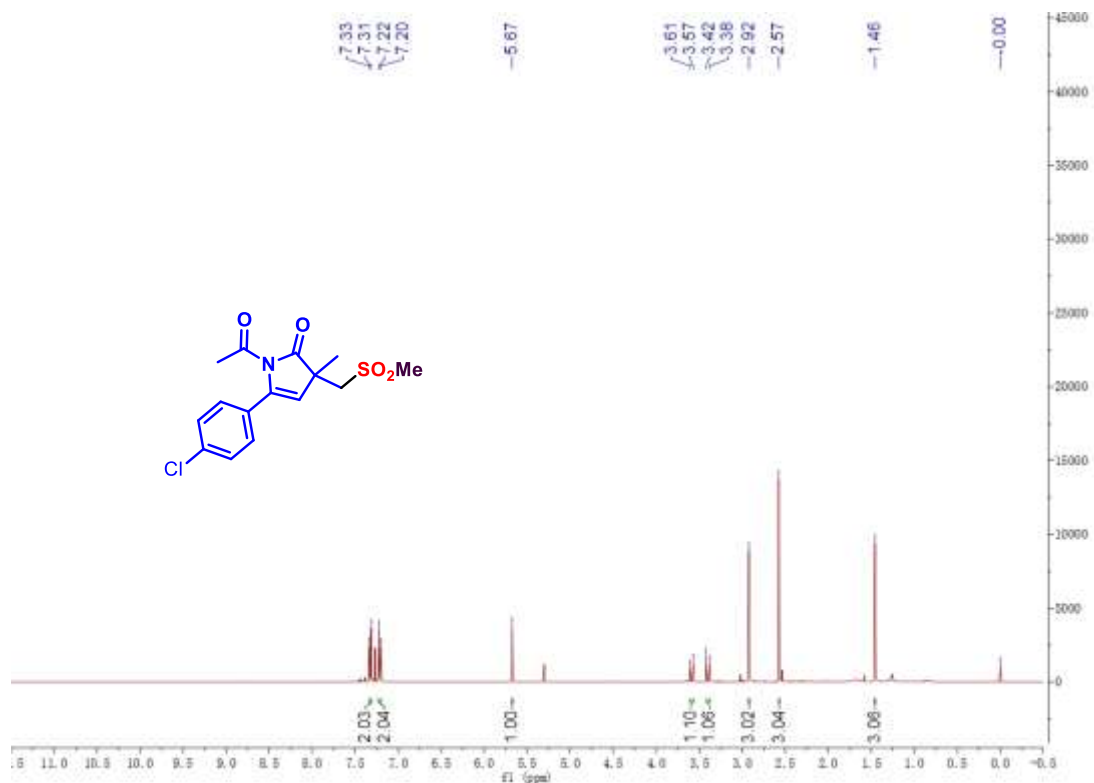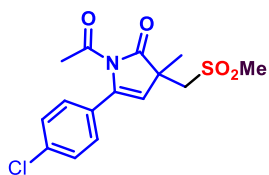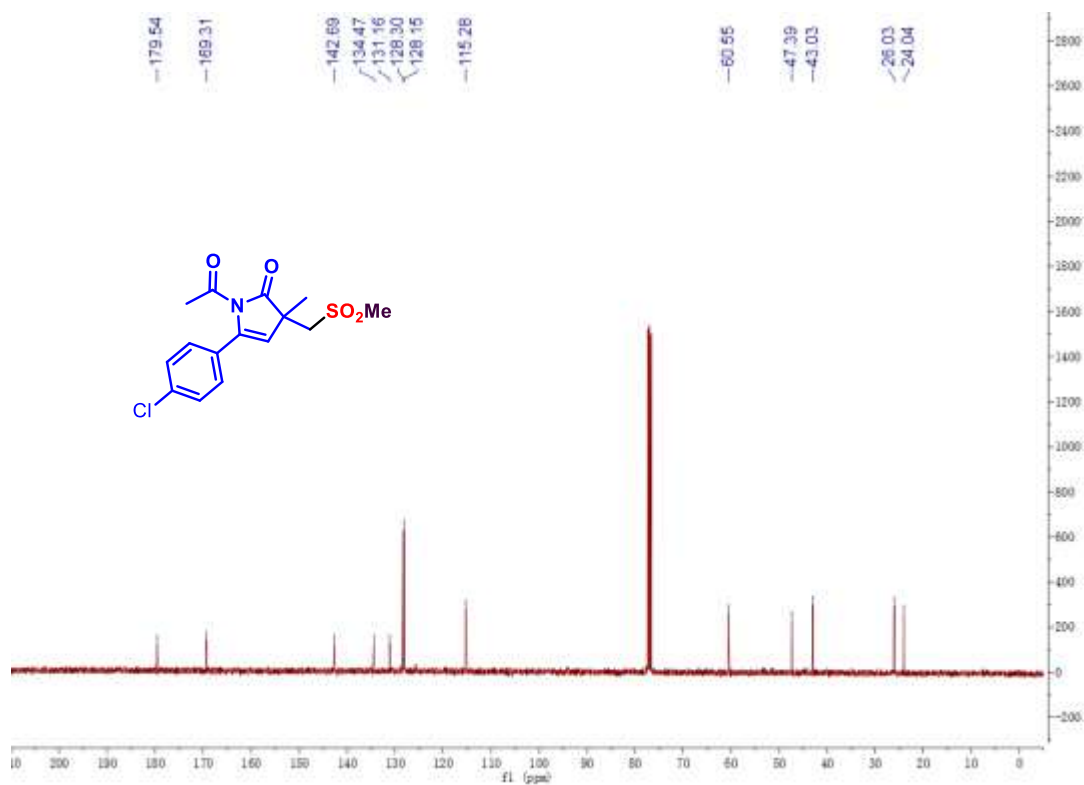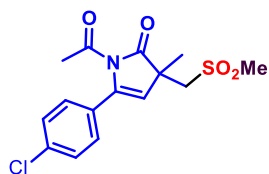

1-acetyl-5-(2-bromophenyl)-3-methyl-3-((methylsulfonyl)methyl)-1,3-dihydro-2H-pyrrol-2-one (**5ia**)

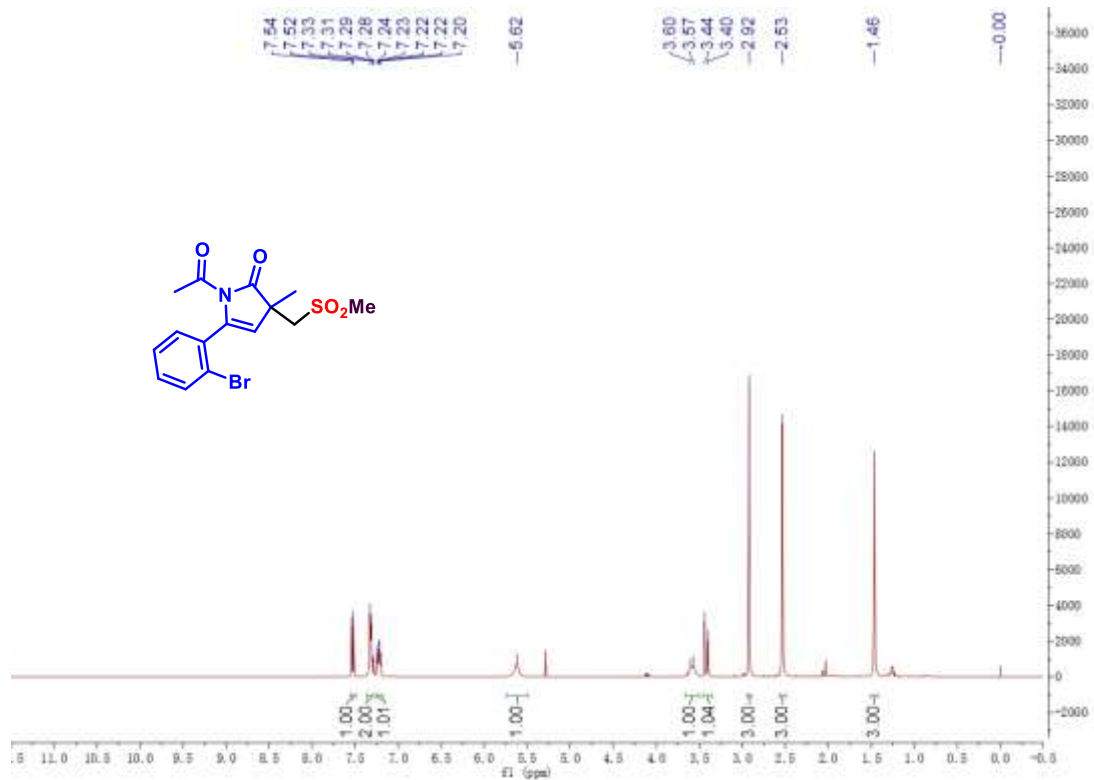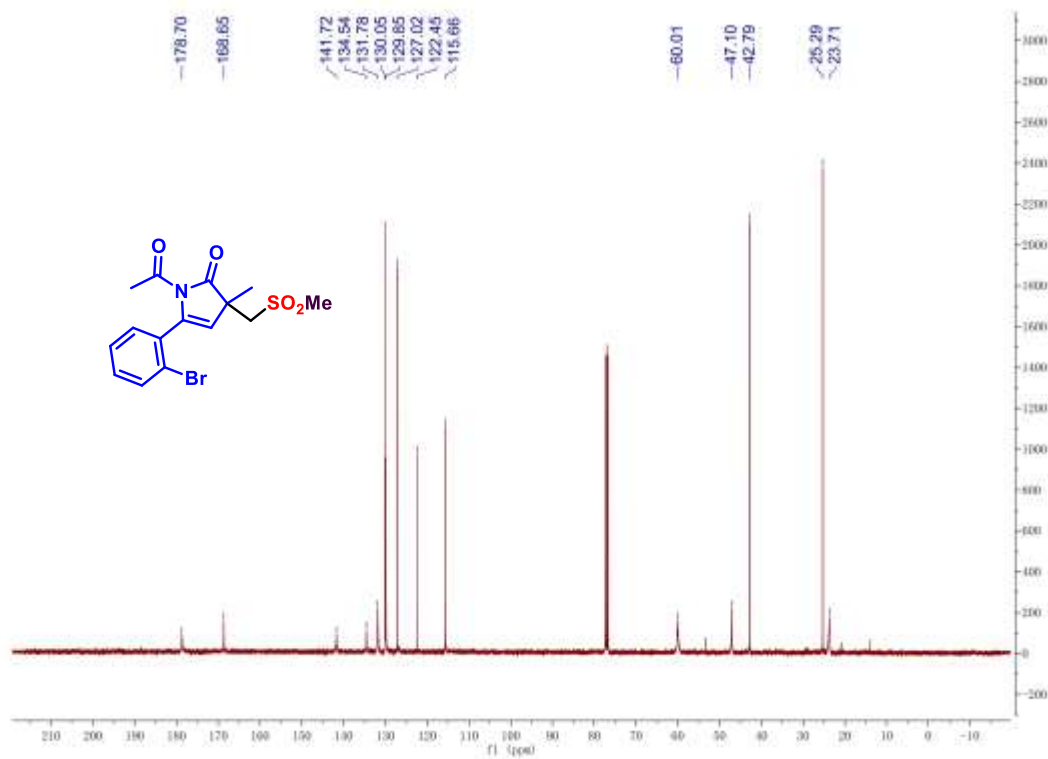

1-acetyl-3-methyl-3-((methylsulfonyl)methyl)-5-(thiophen-3-yl)-1,3-dihydro-2H-pyrrol-2-one (**5ja**)

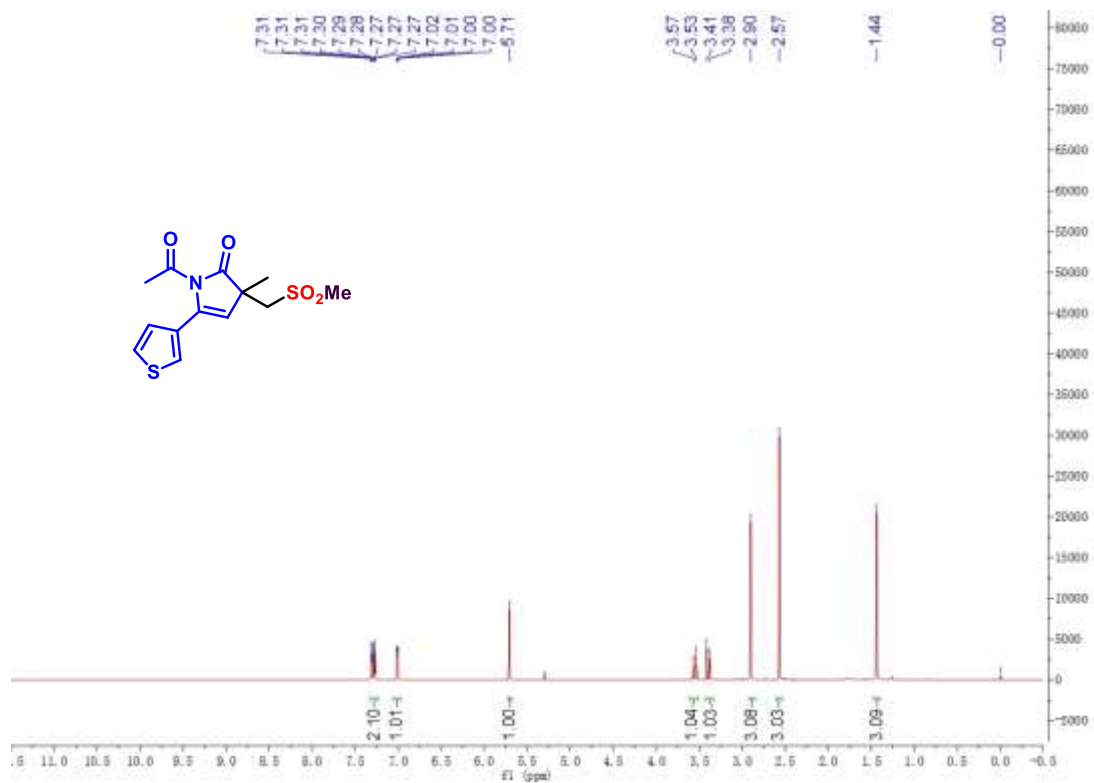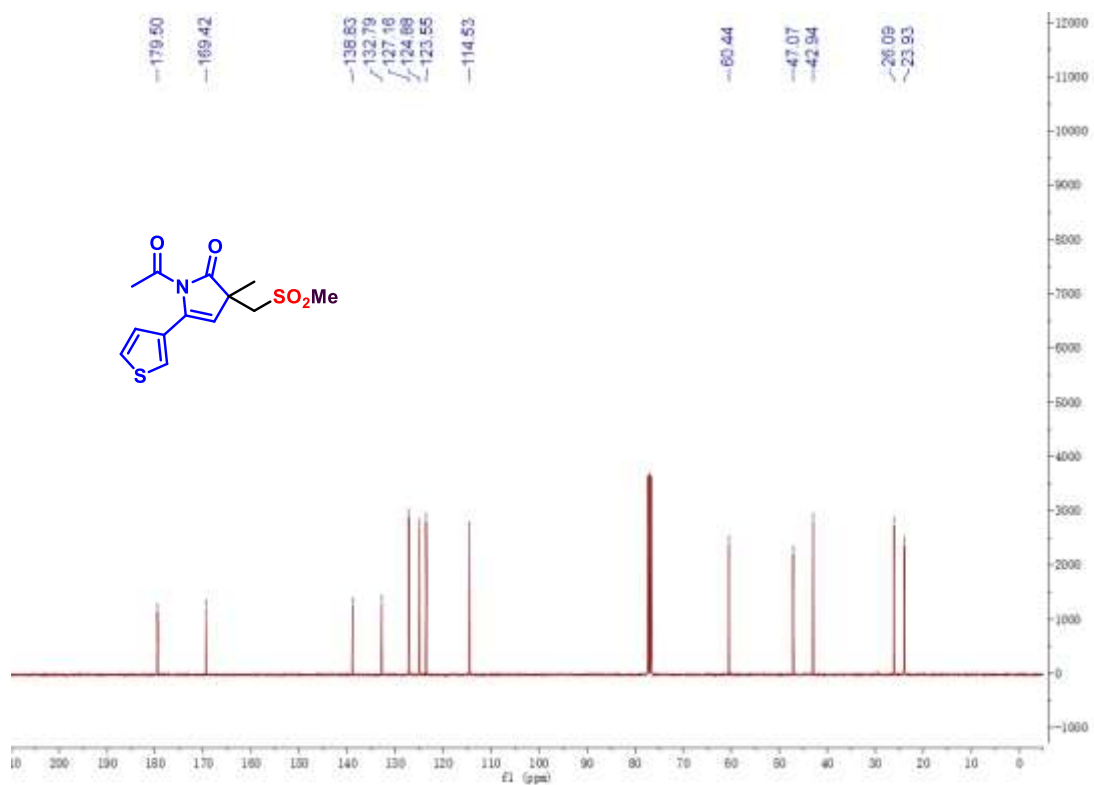

acetyl-3-methyl-3-((methylsulfonyl)methyl)-5-(naphthalen-2-yl)-1,3-dihydro-2H-pyrr  
ol-2-one (**5ka**)

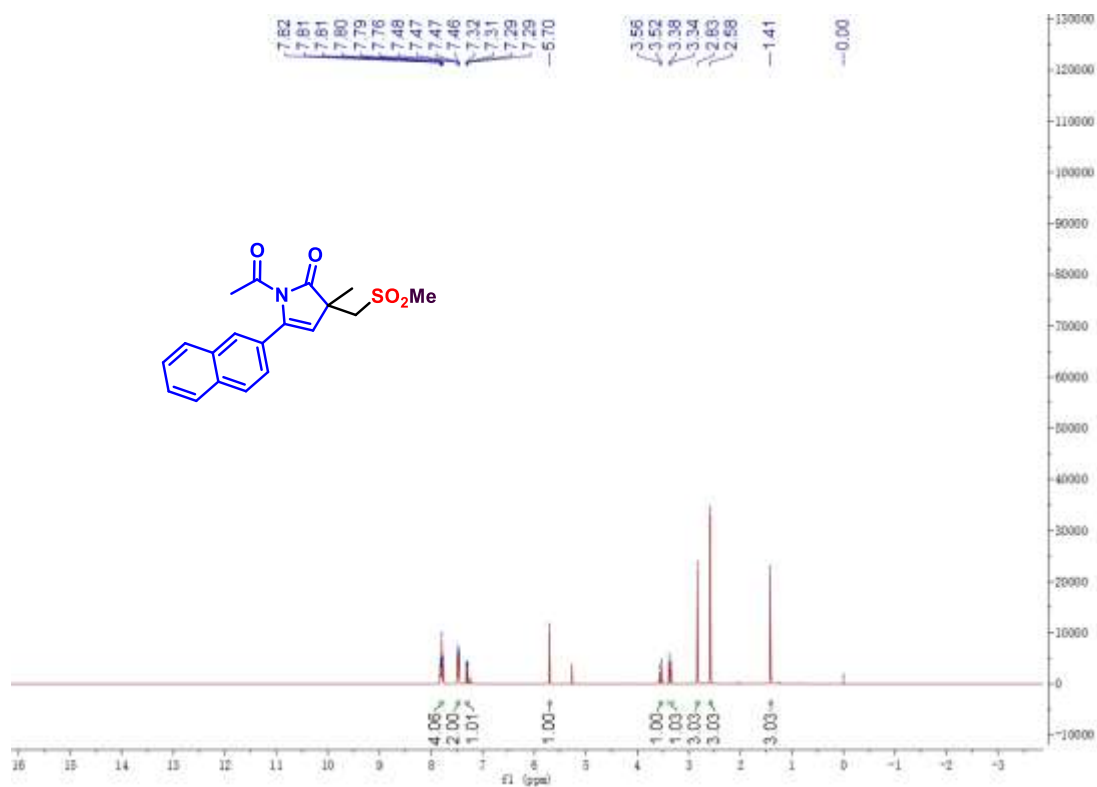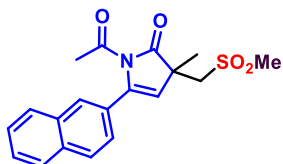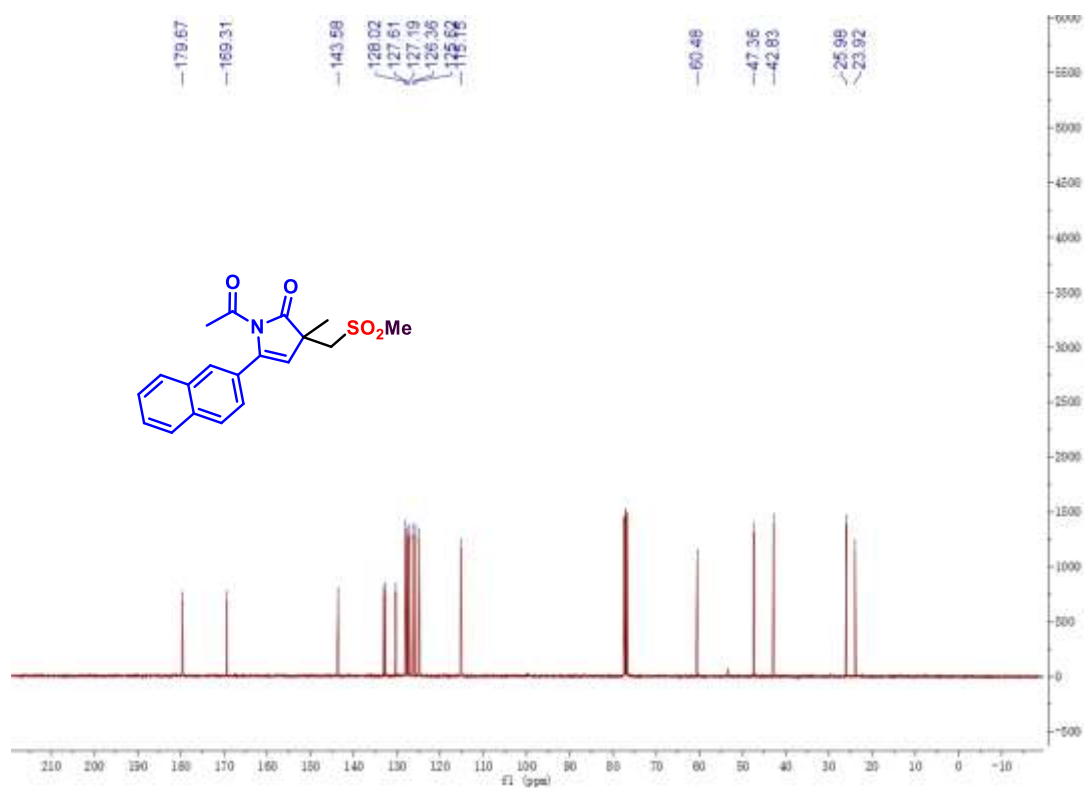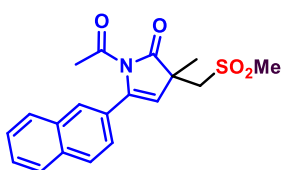



1-acetyl-3-methyl-3-((methylsulfonyl)methyl)-1,3,4,5-tetrahydro-2H-benzo[g]indol-2-one (51a)

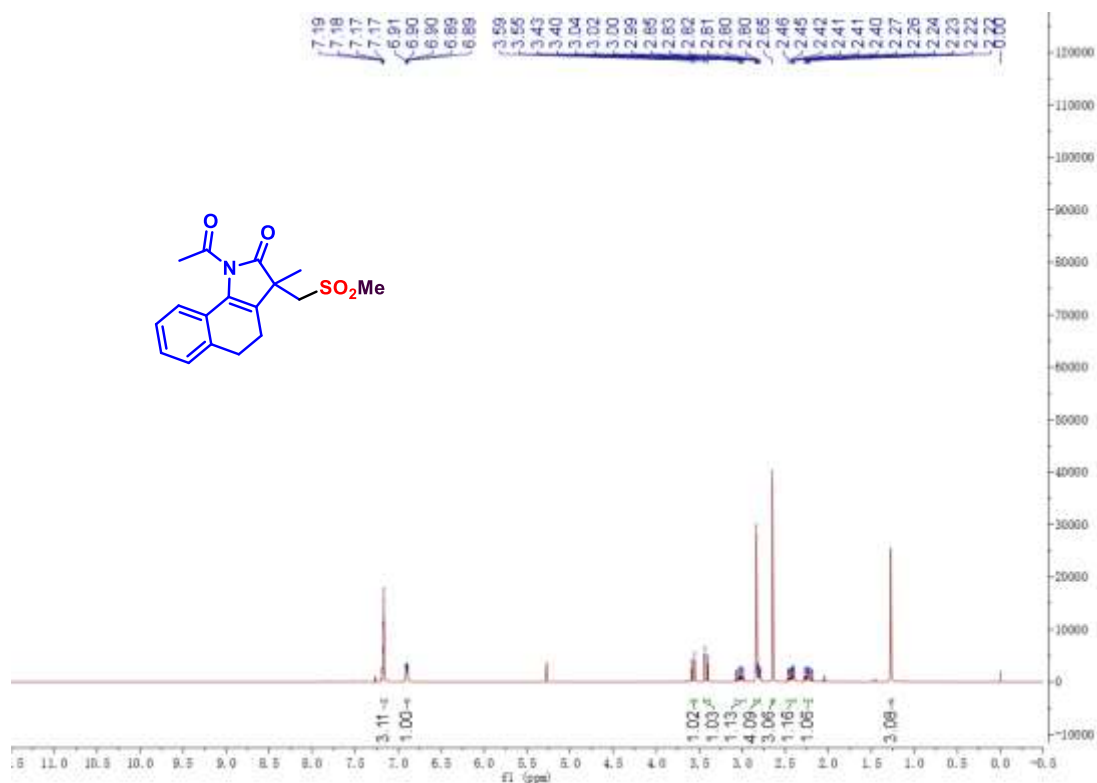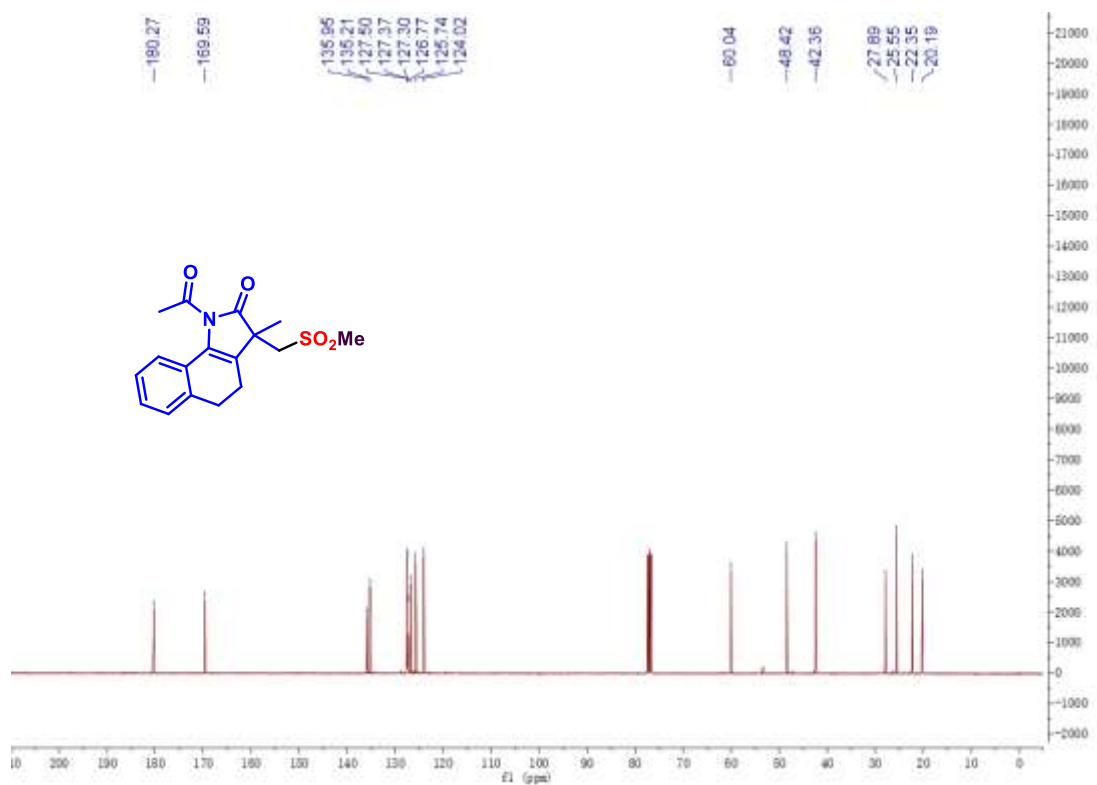

Supplement: d4cc02865a1.pdf [file d4cc02865a1.pdf]
